# Supplementary material for: Signaling pathway network alterations in human ovarian cancers identified with quantitative mitochondrial proteomics
Source: PubMed Central journal article supplement (PMC6562010; doi:10.1007/s13167-019-00170-5), 2019-06-08

## Supplementary Figure 1

Cancer-related canonical pathways ( $p < 0.05$ , and  $|z| \geq 2$ ) were identified from ovarian cancer mitochondrial differentially expressed proteins (mtDEPs).

1. Antigen presentation pathway
2. Mitochondrial dysfunction
3. GP6 signaling pathway
4. EIF2 signaling
5. Glutathione-mediated detoxification
6.  $\alpha$ -Adrenergic signaling
7. Creb signaling
8. CXCR4 signaling in neurons
9. Regulation of EIF4 and p70S6K signaling
10. Endothelin signaling
11. Ephrin receptor signaling
12. Fatty acid beta-oxidation I
13. FLMP signaling in neutrophils
14. G beta gamma signaling
15. G $\alpha$ q signaling
16. GNRN signaling
17. IGF-1 signaling
18. IL2 signaling
19. IL-8 signaling
20. Integrin signaling
21. mTOR signaling
22. Ovarian cancer signaling
23. Oxidative phosphorylation
24. P2Y Purigenic receptor signaling pathway
25. Phospholipase c signaling
26. Signaling by Rho family GTPases
27. Antiproliferative role of somatostatin signaling
28. Tec kinase signaling
29. Thrombin signaling

# 1. Antigen presentation pathway

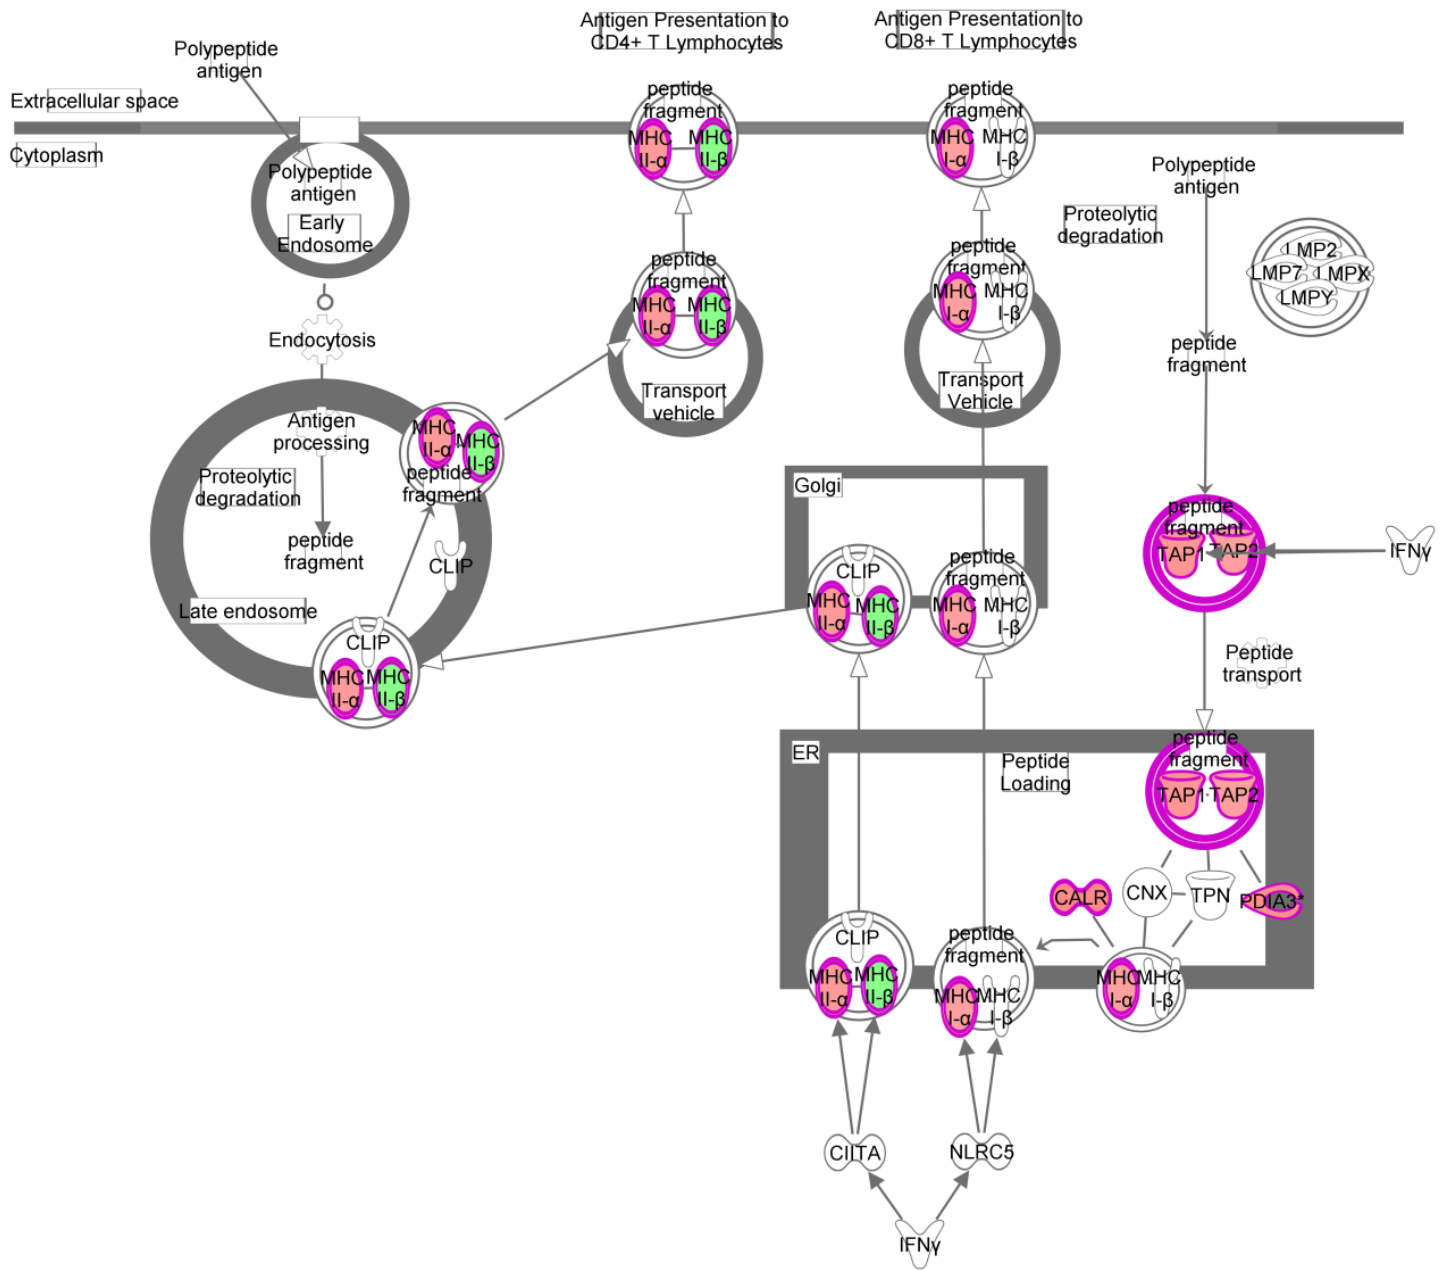

## 2. Mitochondrial dysfunction

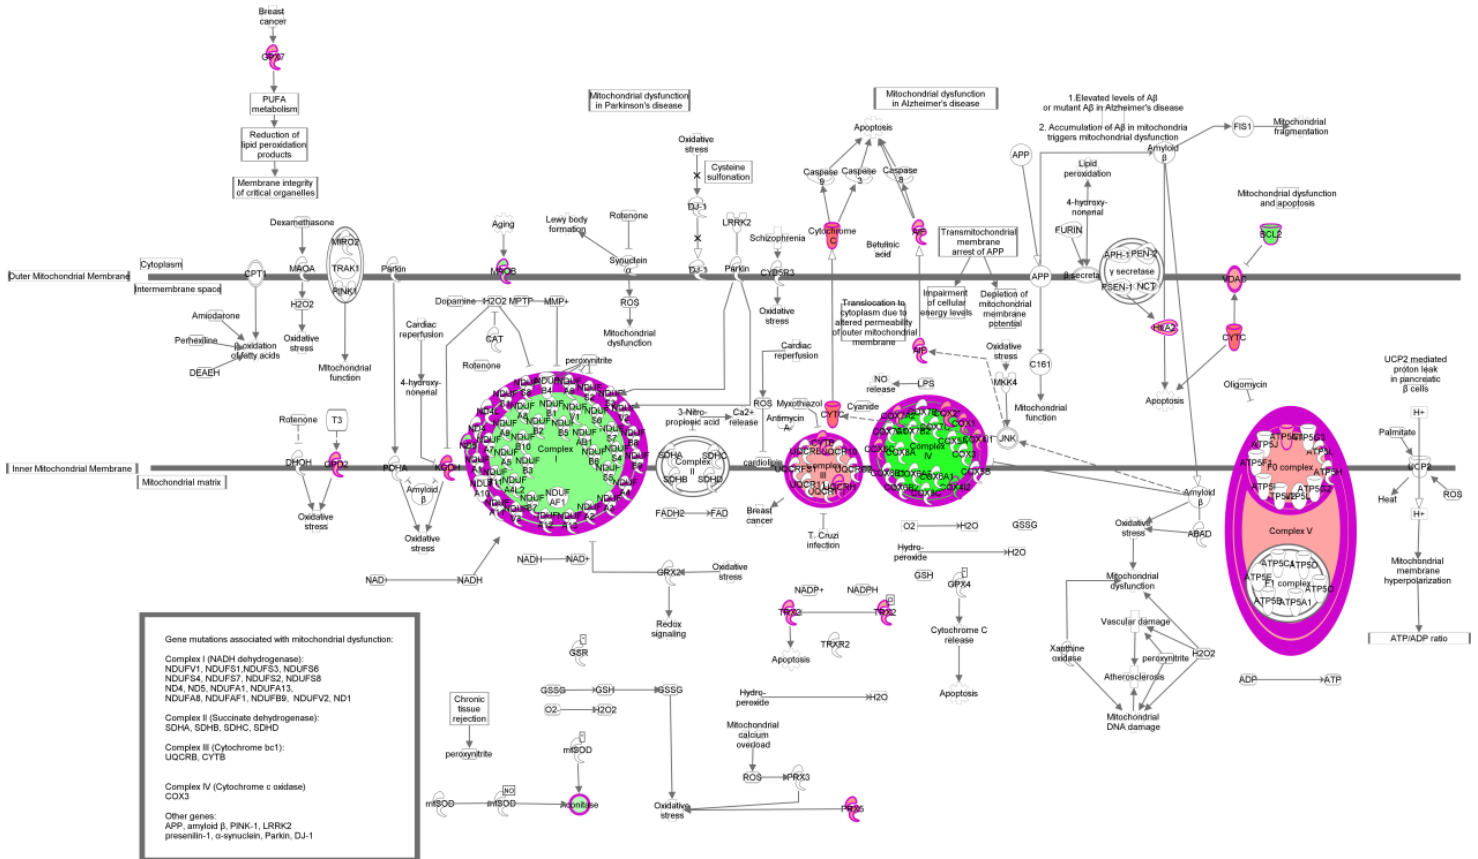

### 3. GP6 signaling pathway

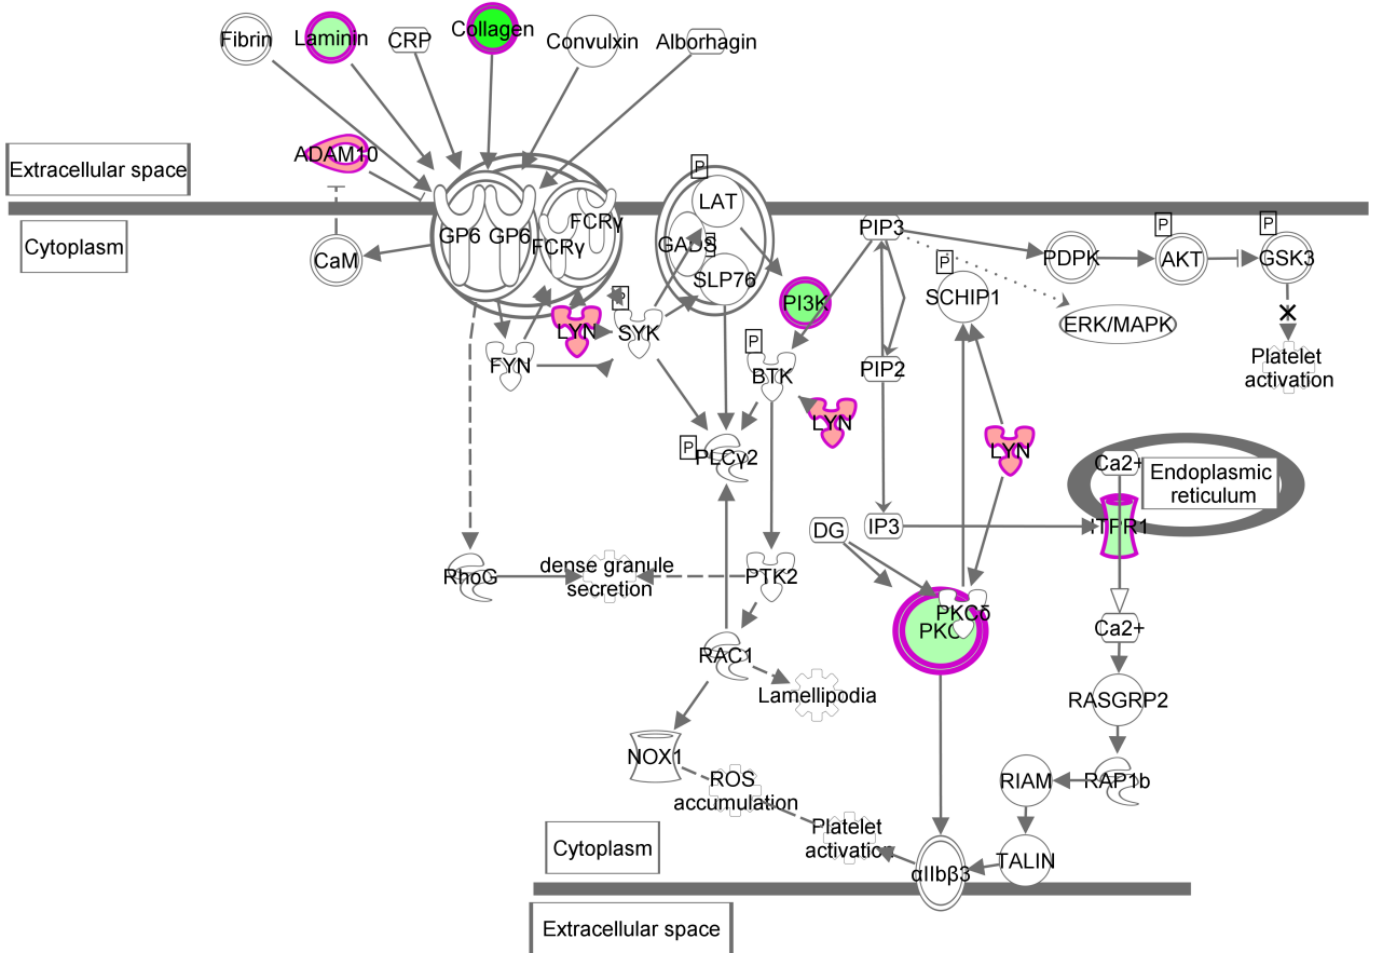

## 4. EIF2 signaling

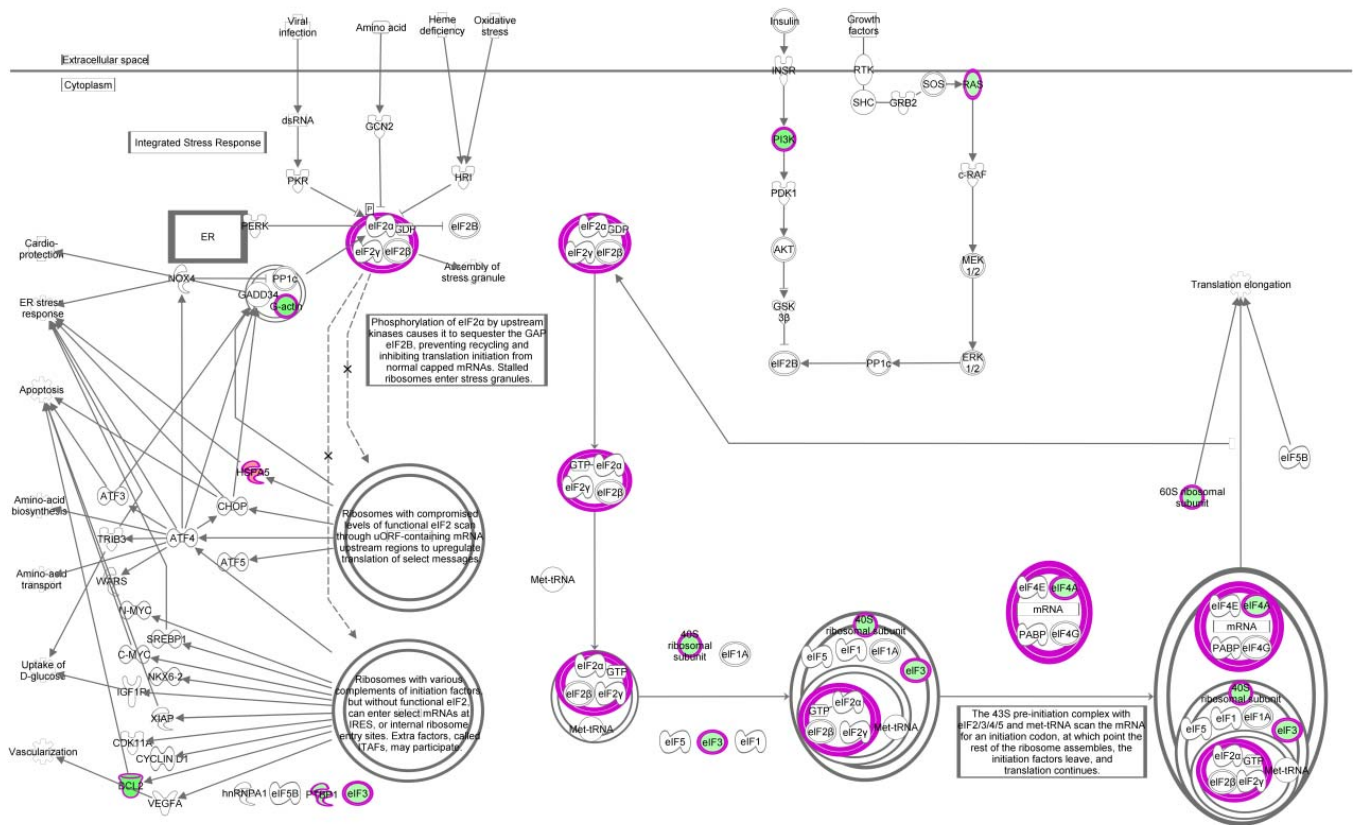

## 5. Glutathione-mediated detoxification

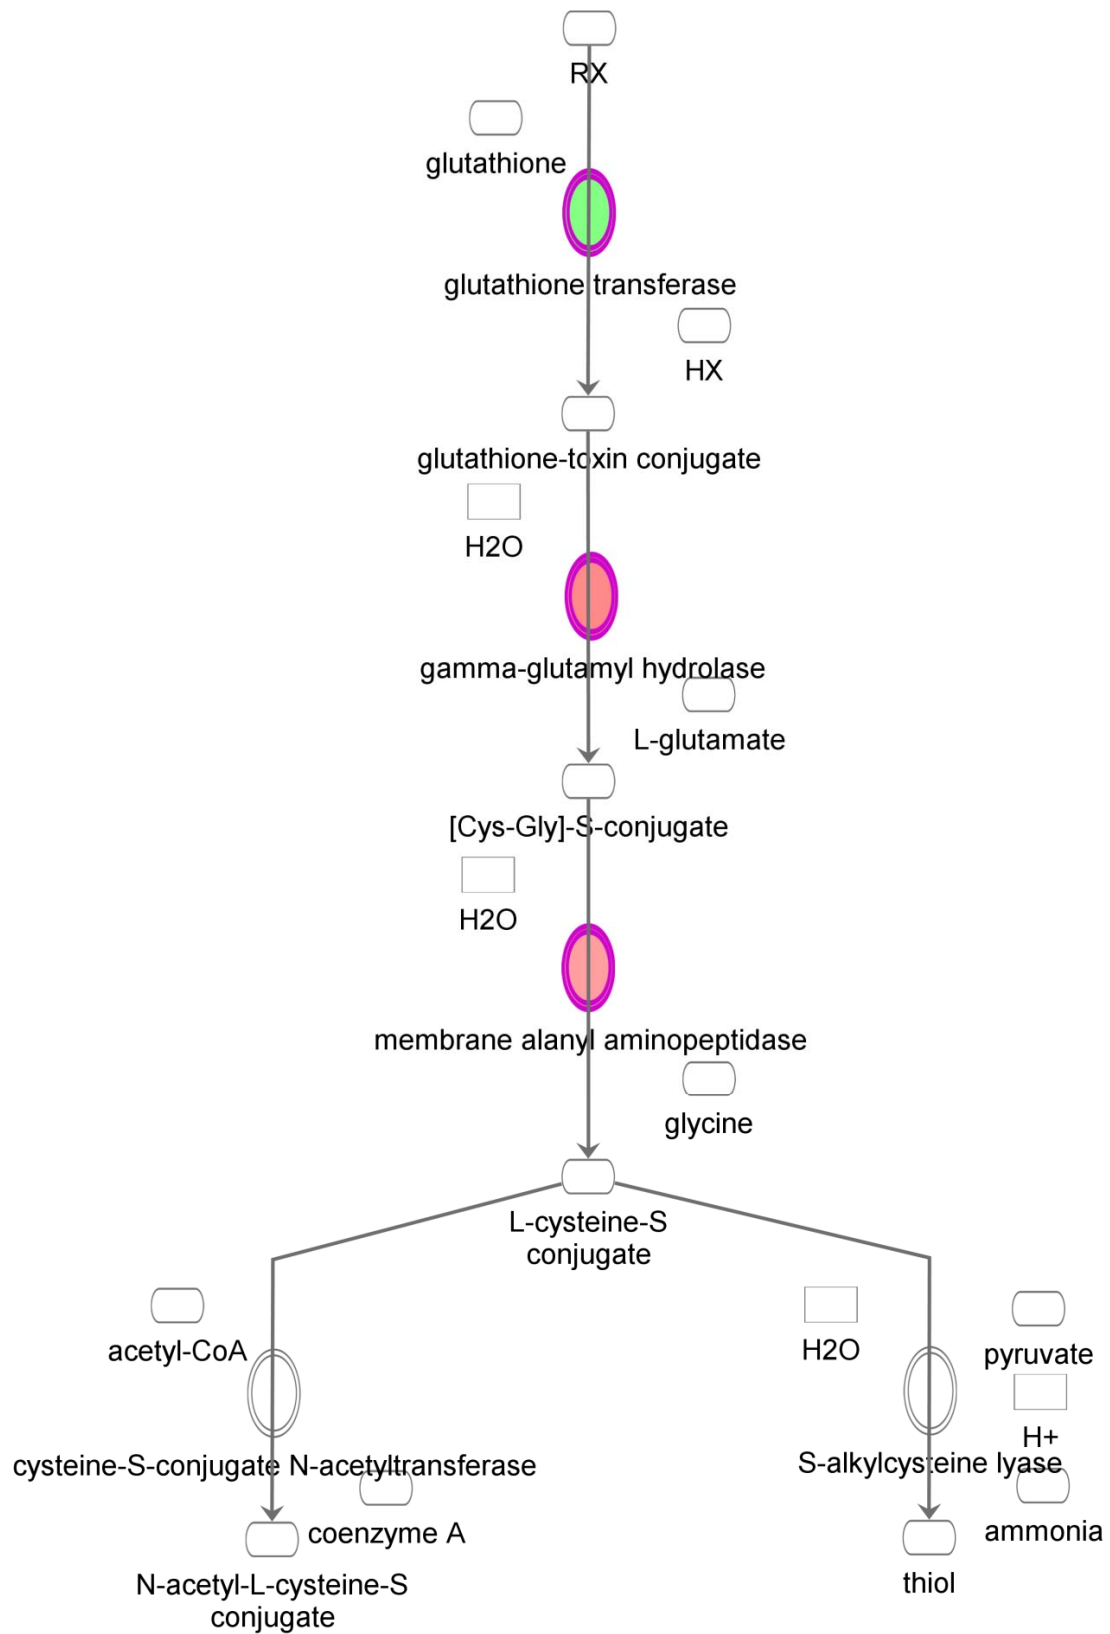

## 6. $\alpha$ -Adrenergic signaling

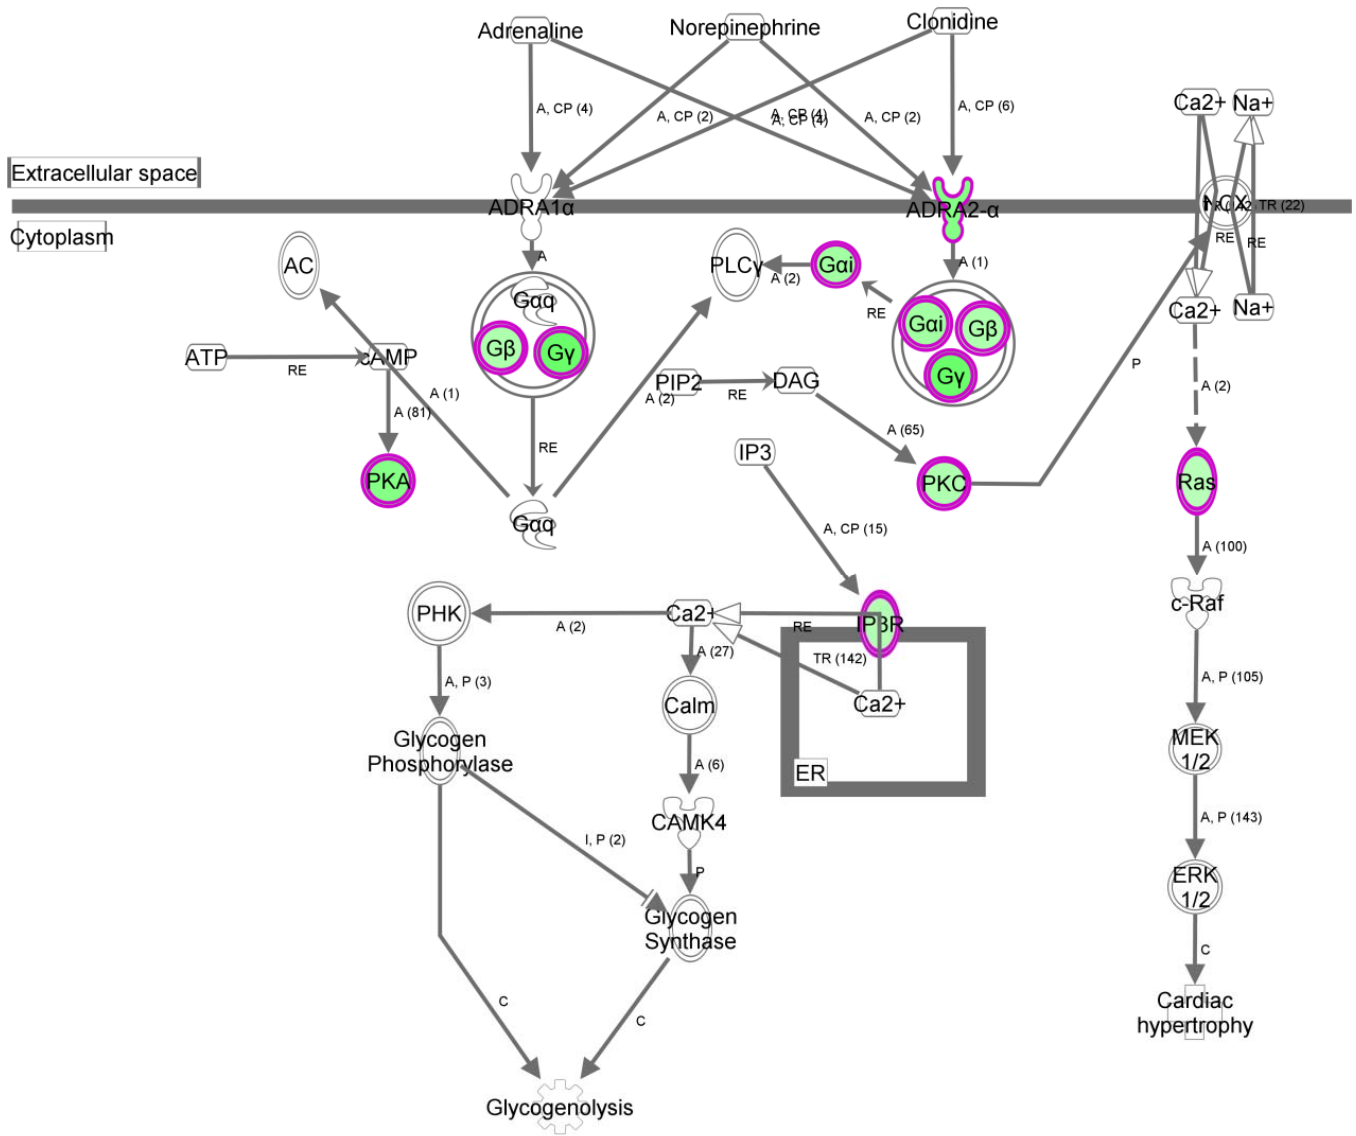

## 7. Creb signaling

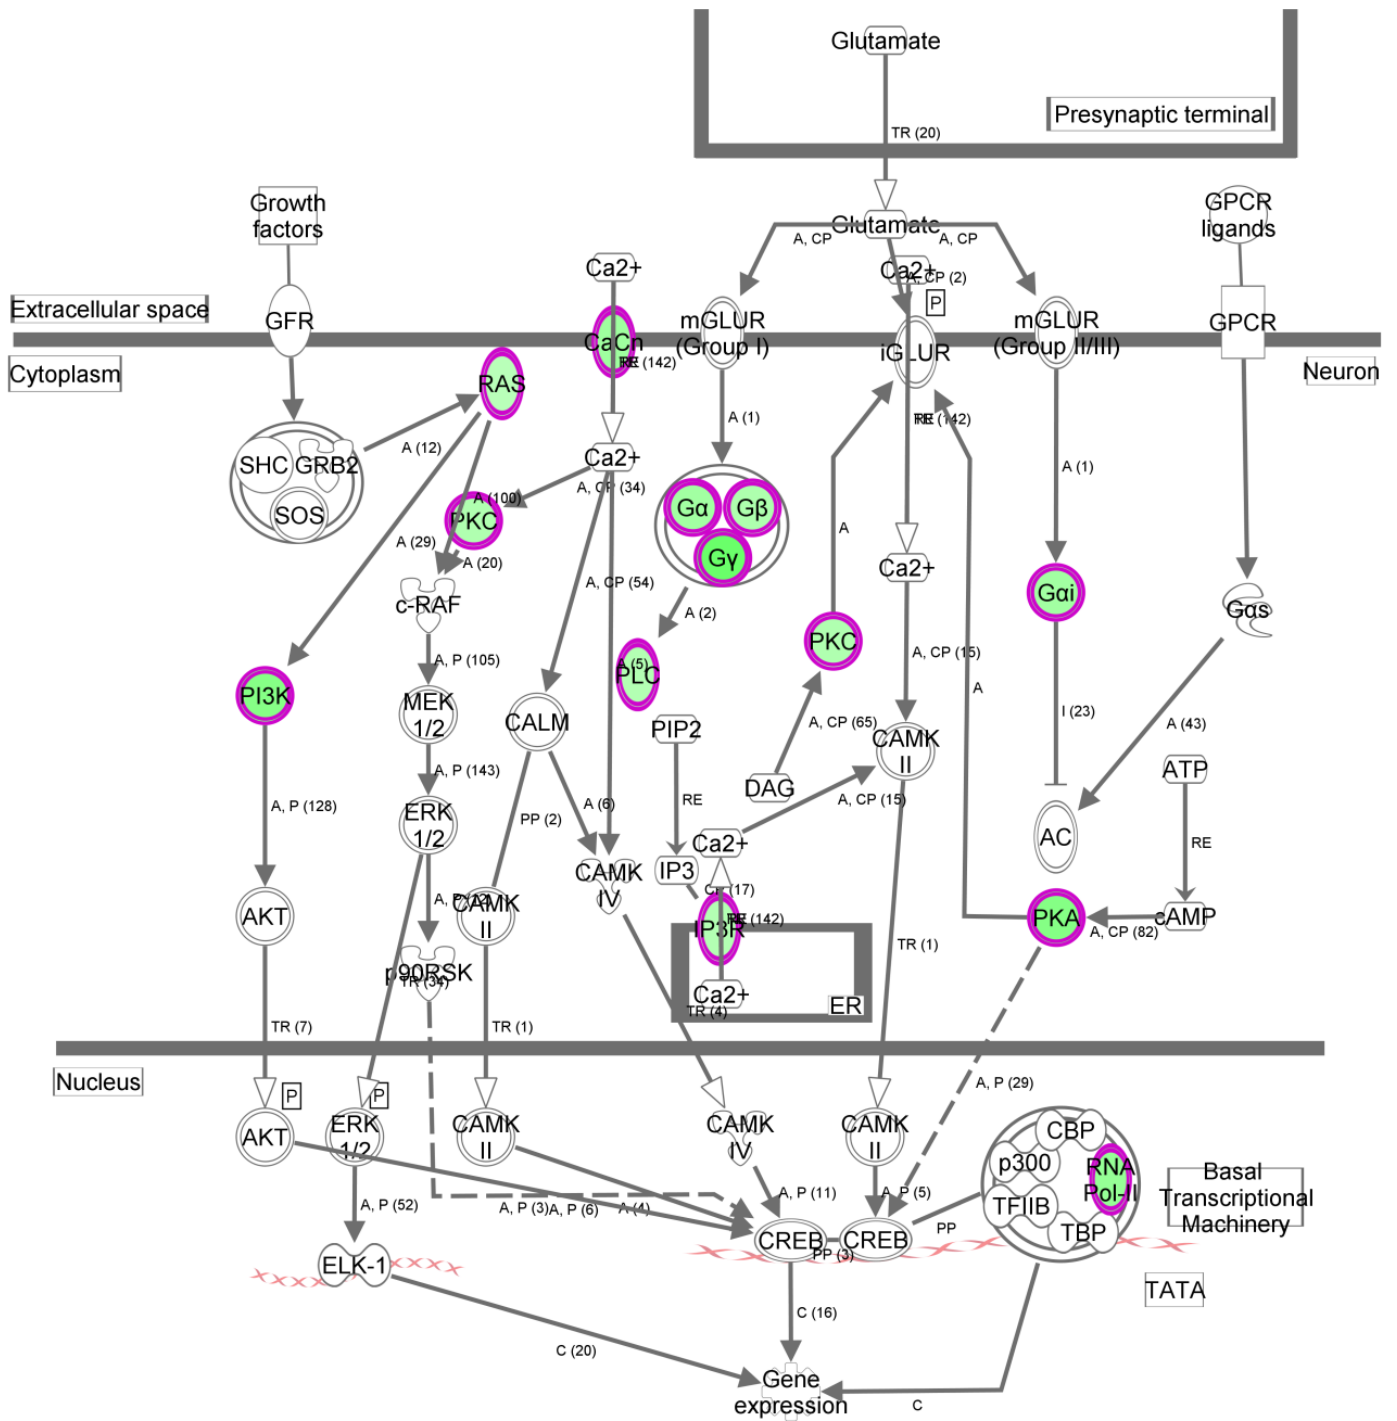



## 8. CXCR4 signaling in neurons

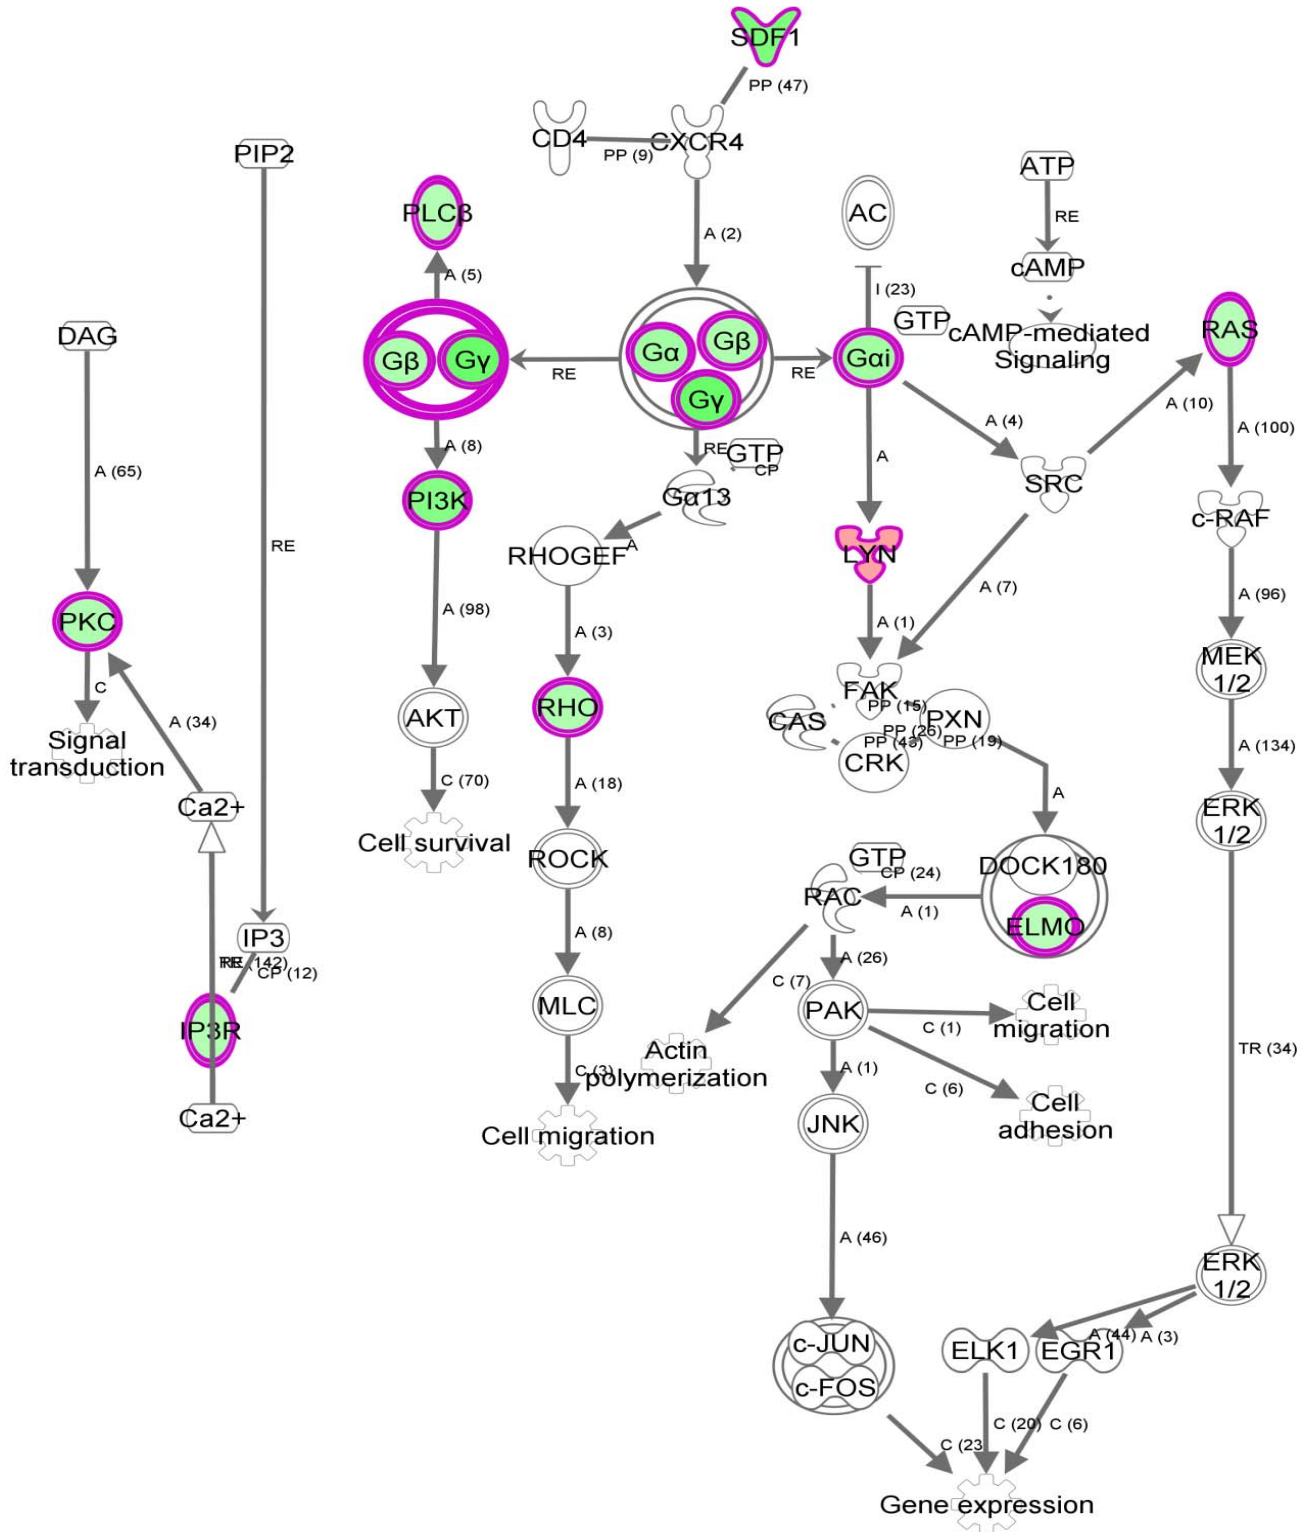

## 9. Regulation of EIF4 and p70S6K signaling

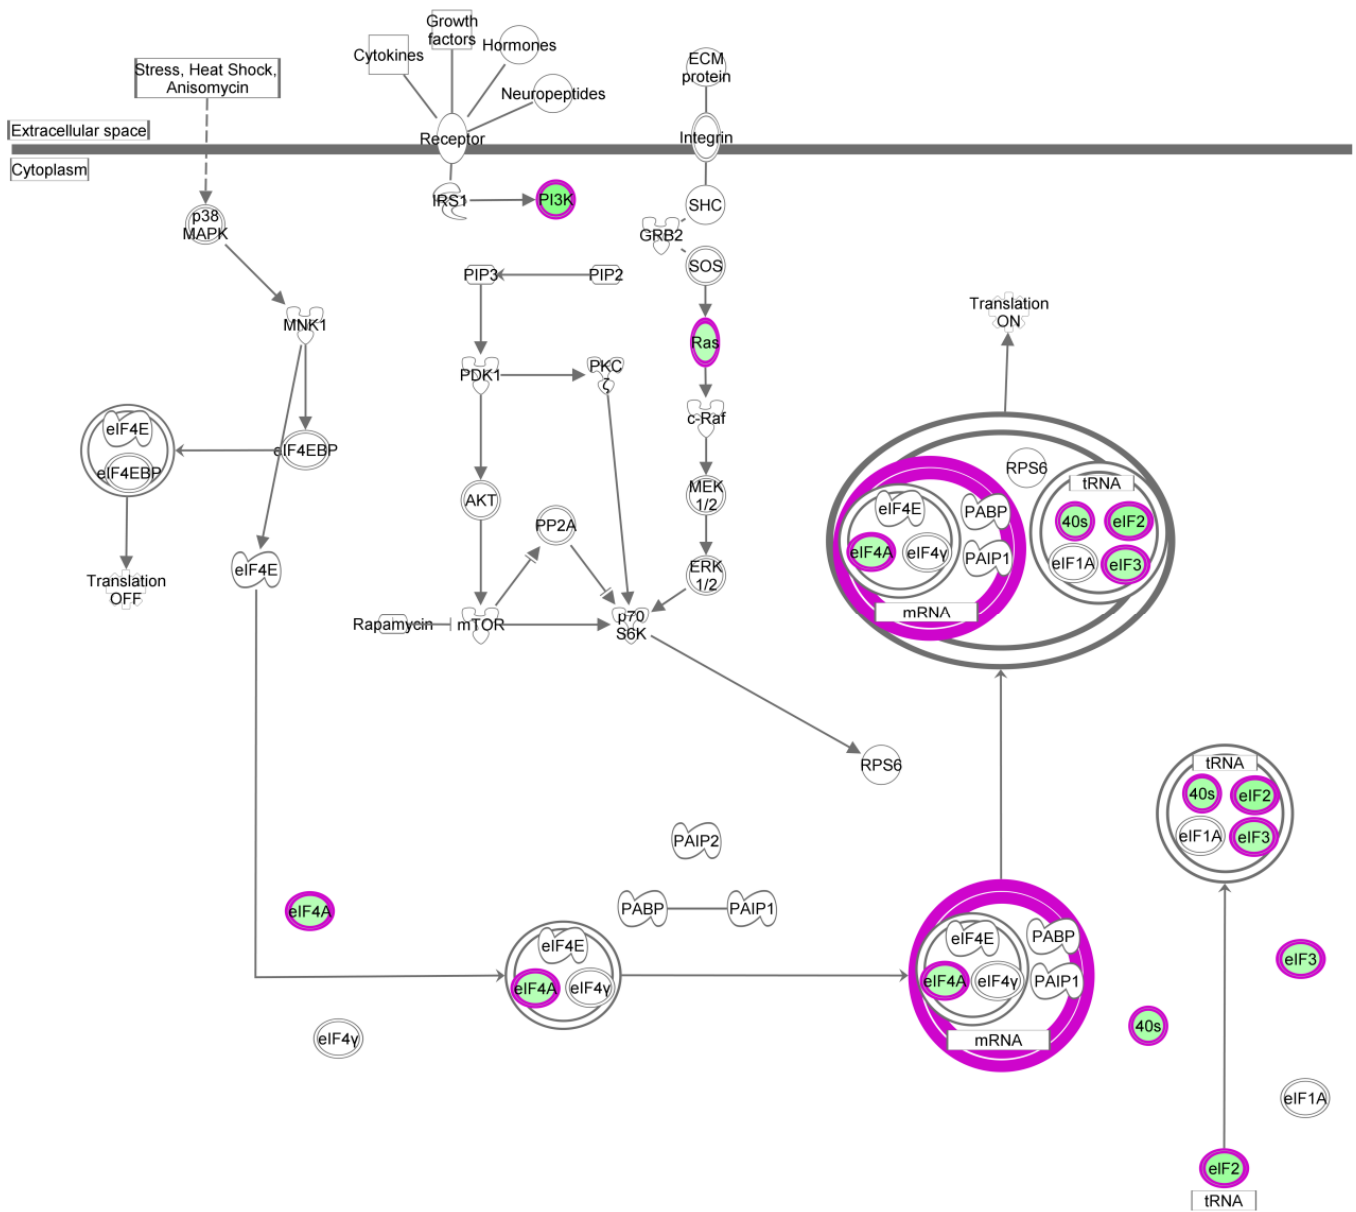

## 10. Endothelin signaling

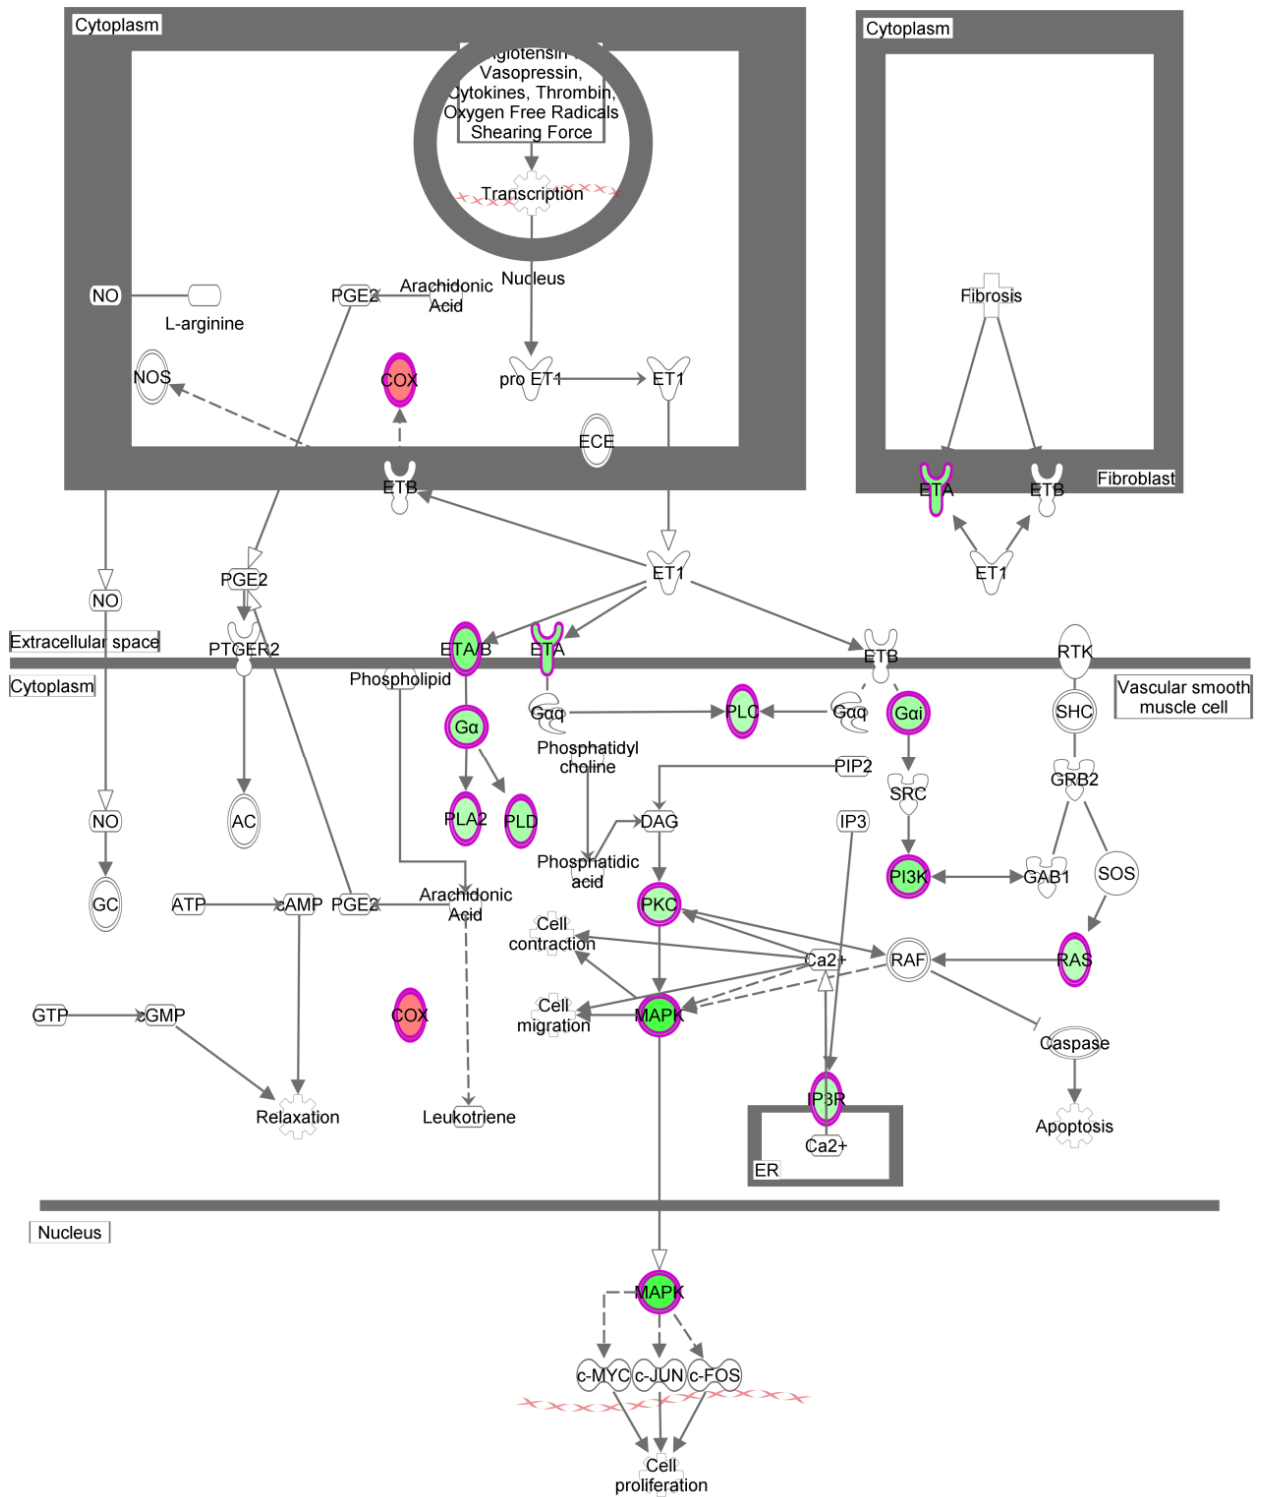

# 11. Ephrin receptor signaling

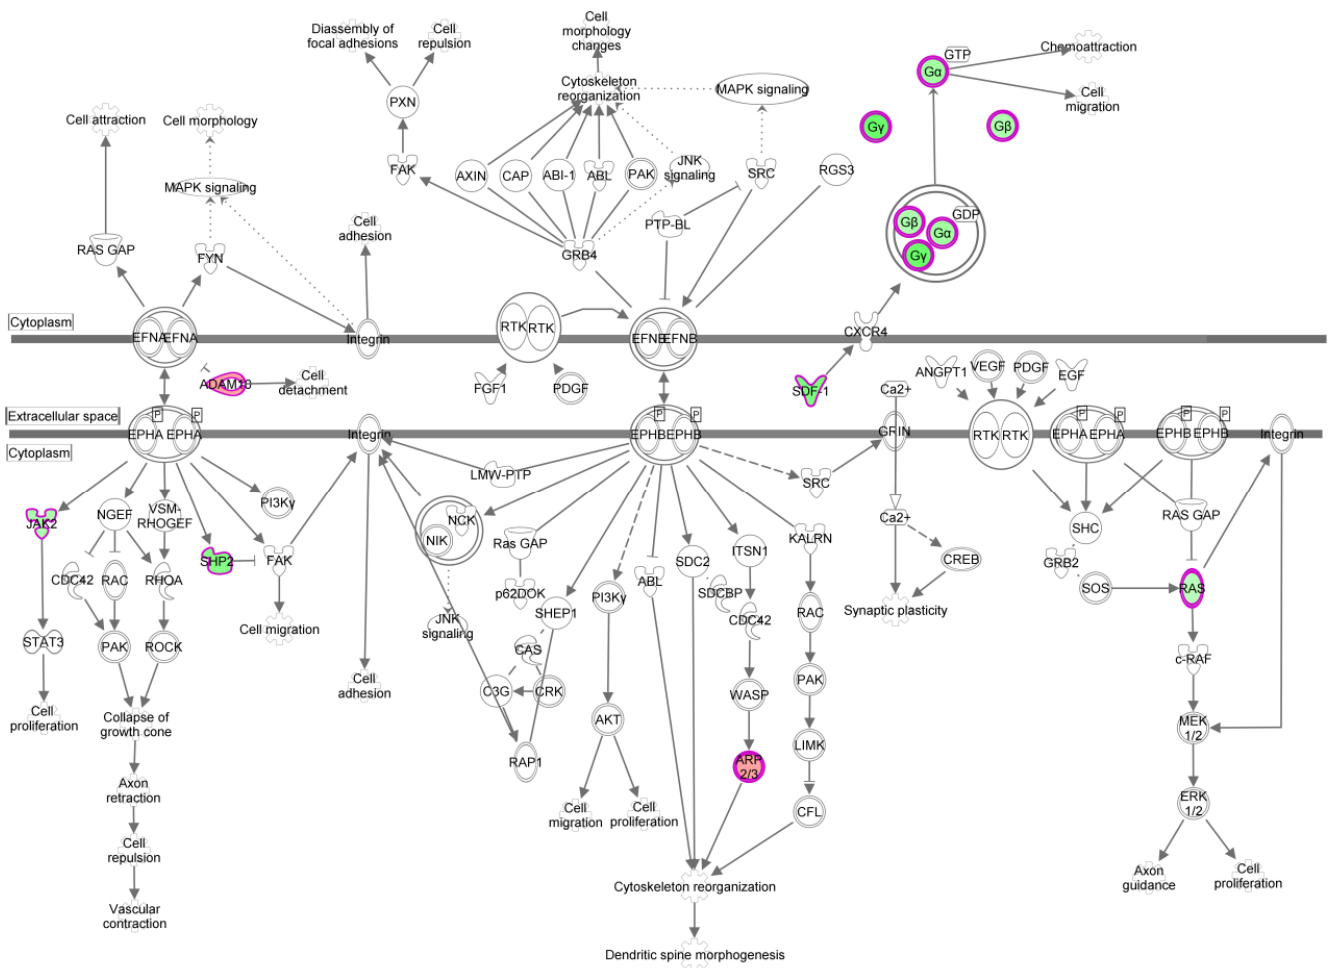

## 12. Fatty acid beta-oxidation I

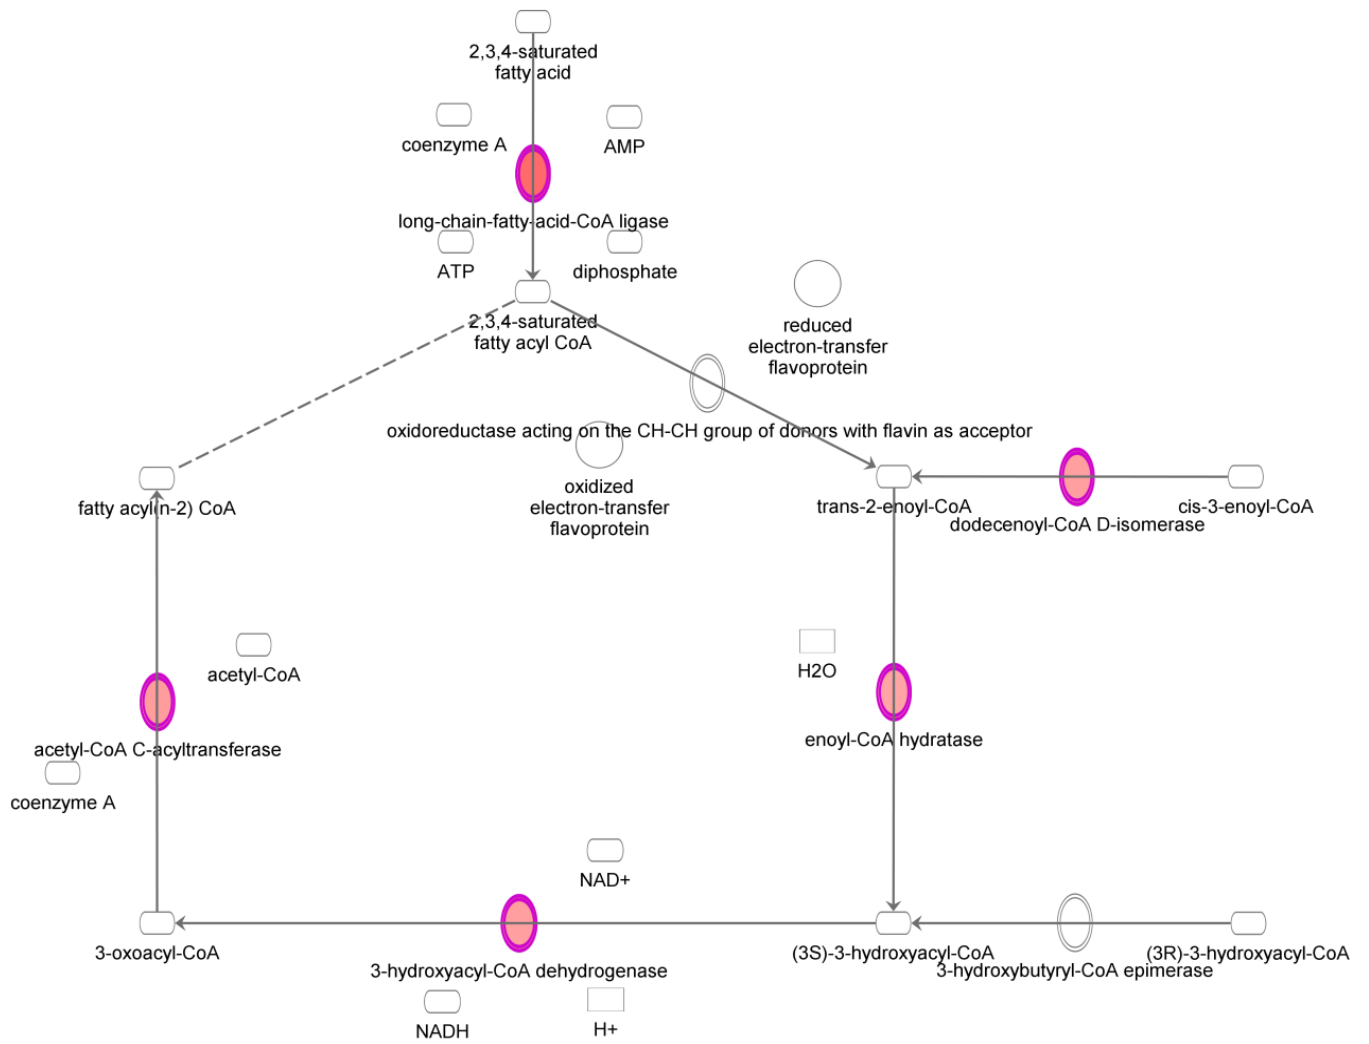

### 13. FLMP signaling in neutrophils

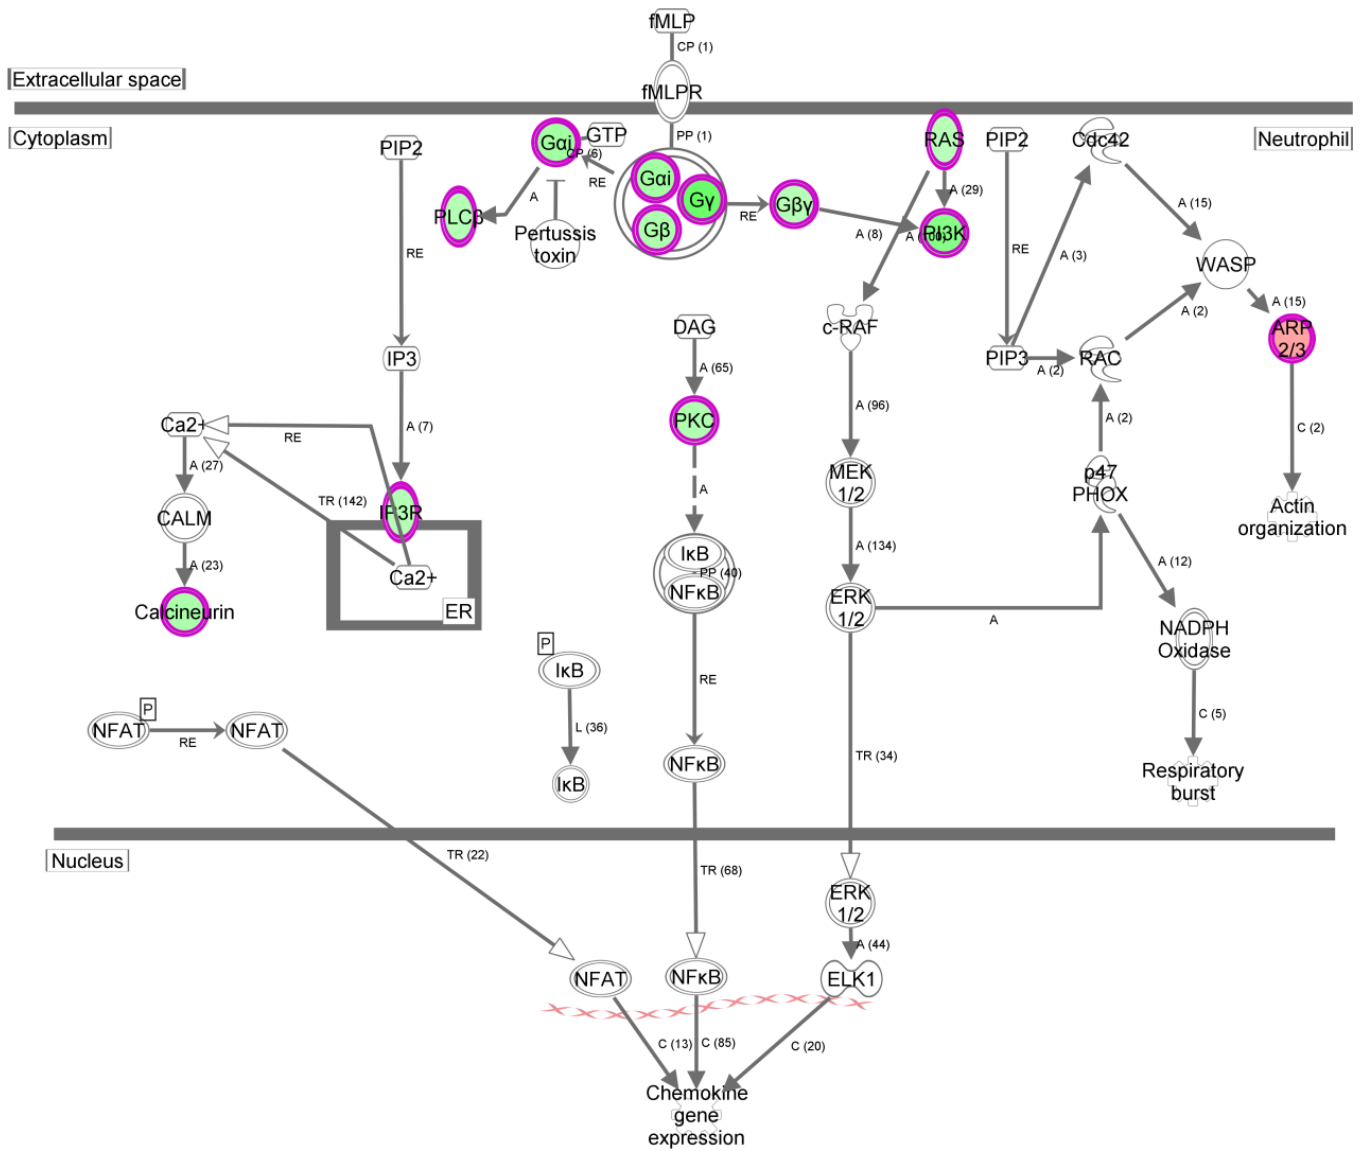

## 14. G beta gamma signaling

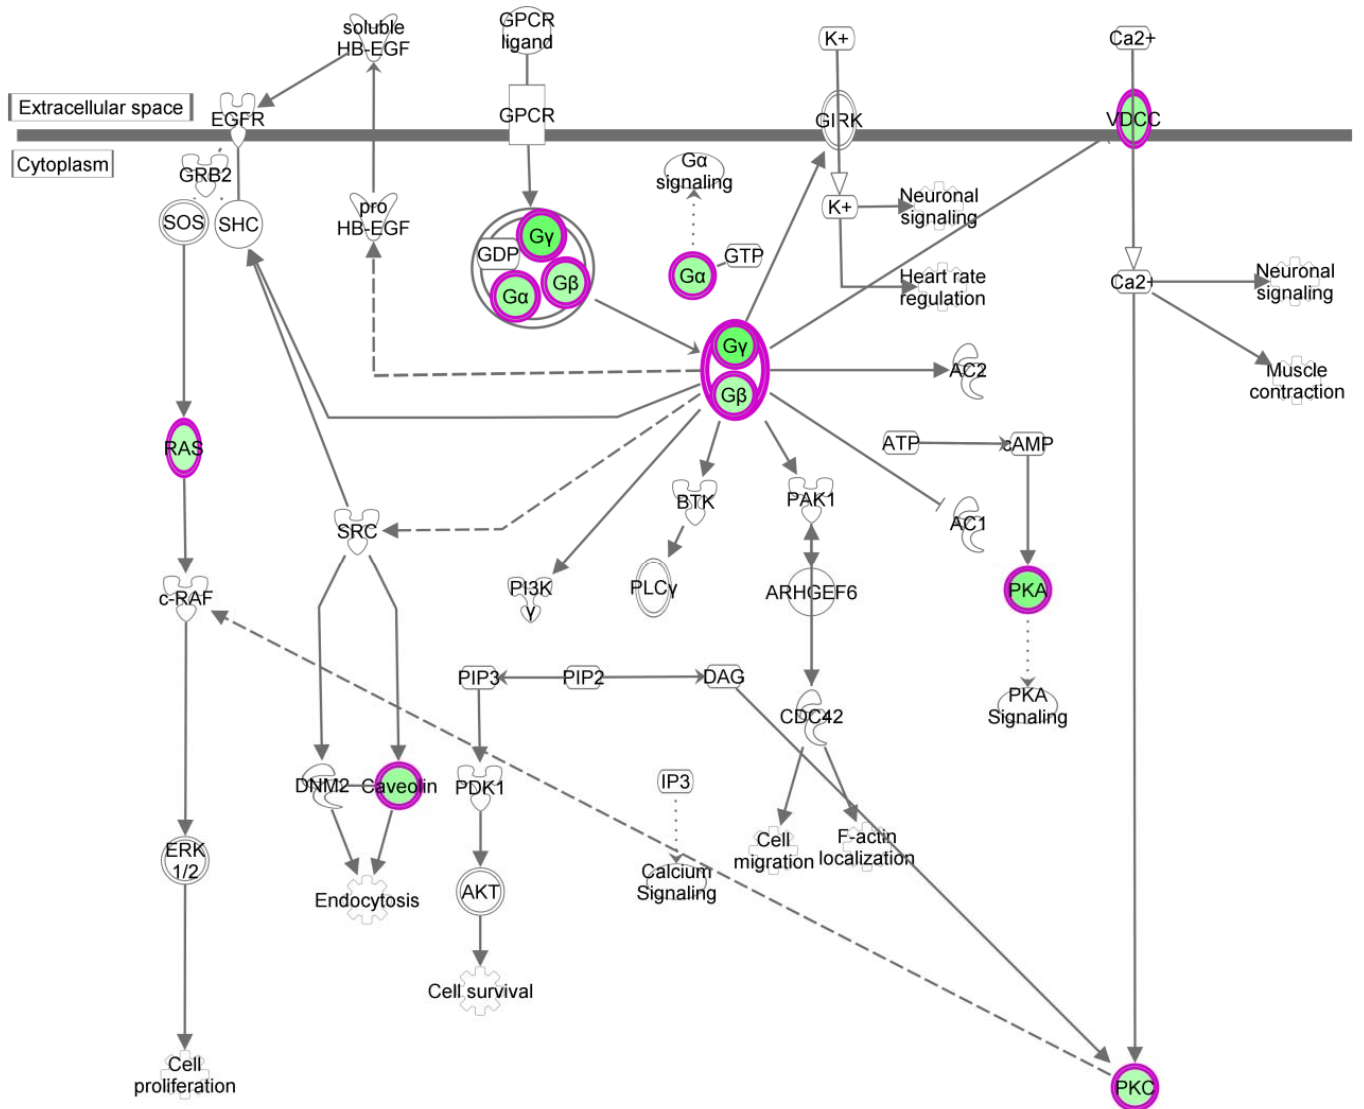

## 15. Gαq signaling

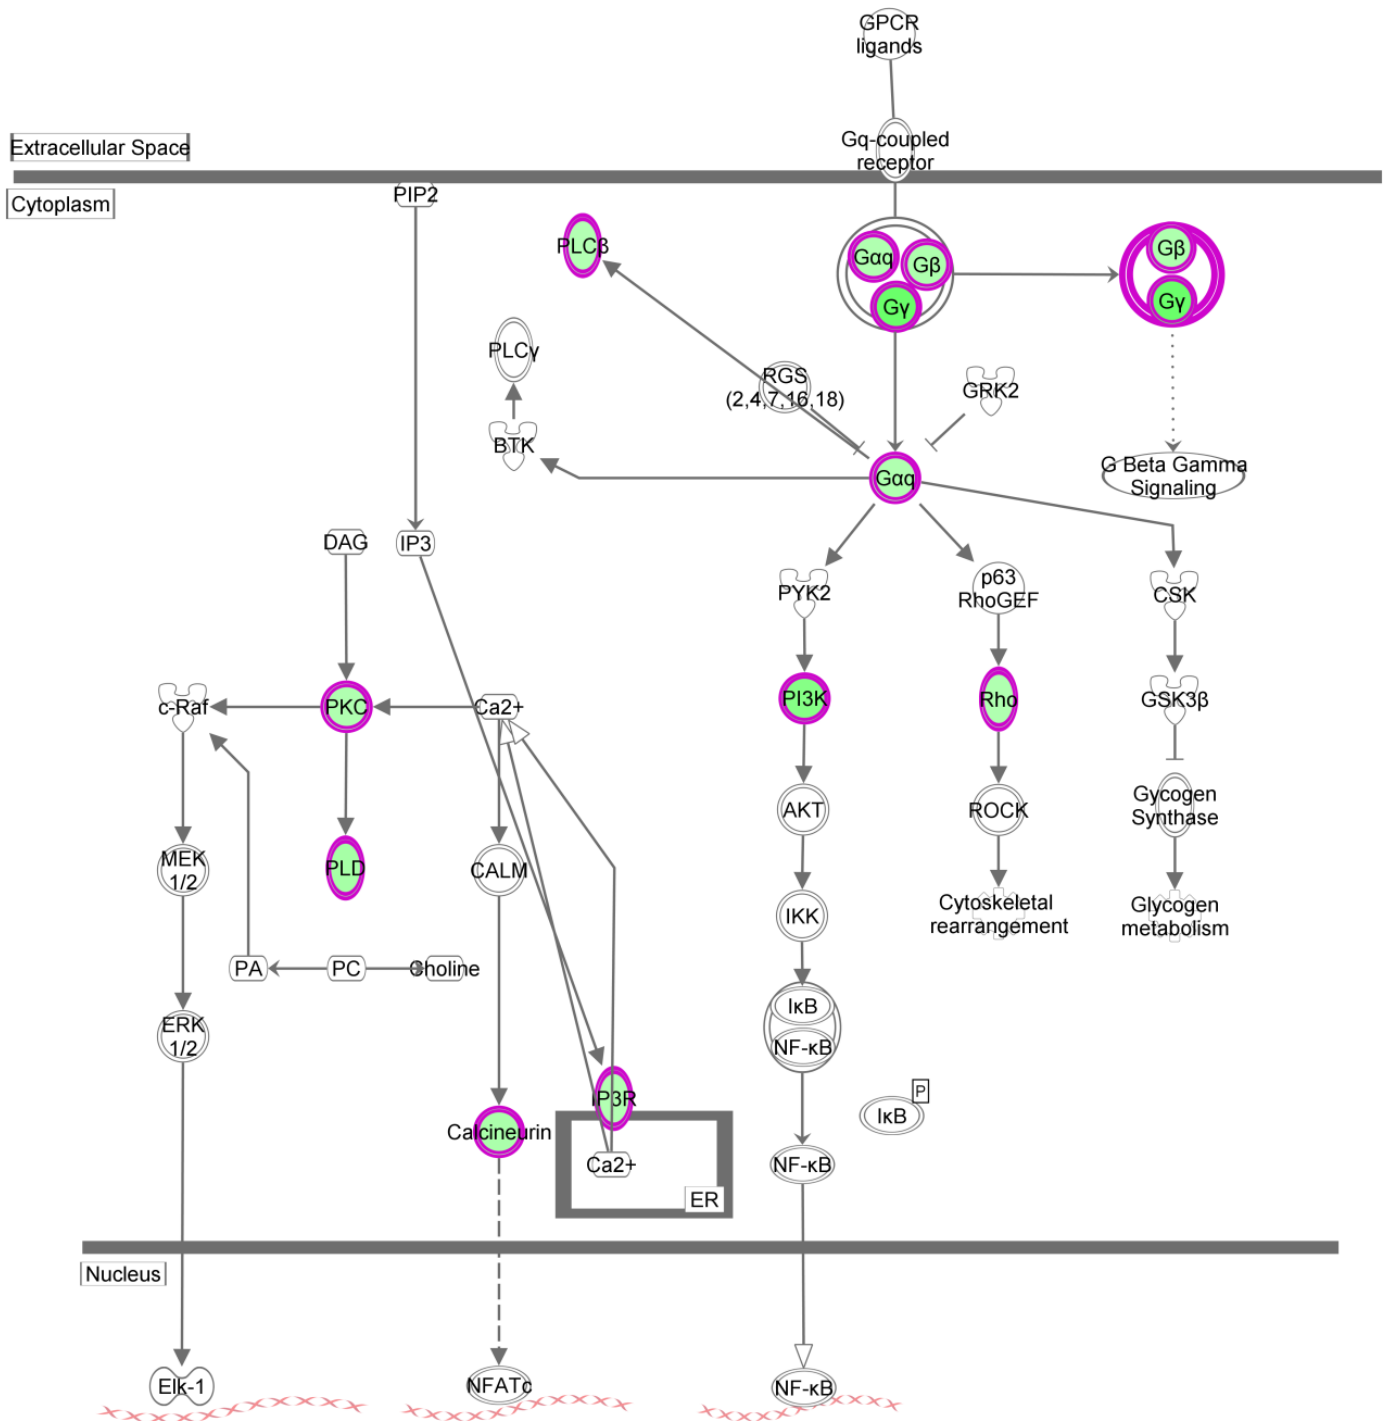



## 16. GNRN signaling IGF-1 signaling

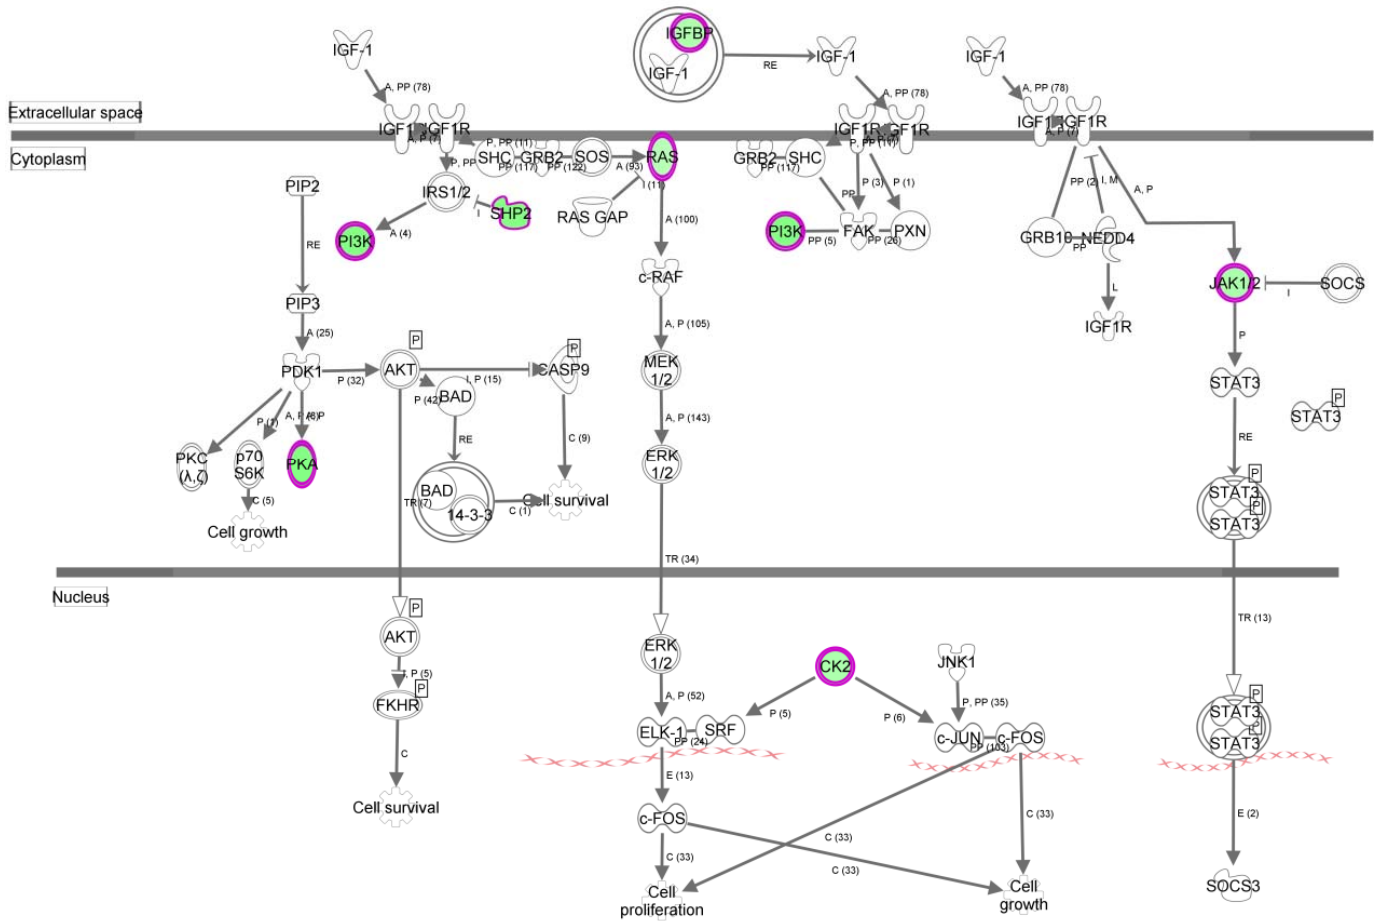

## 17. IL2 signaling

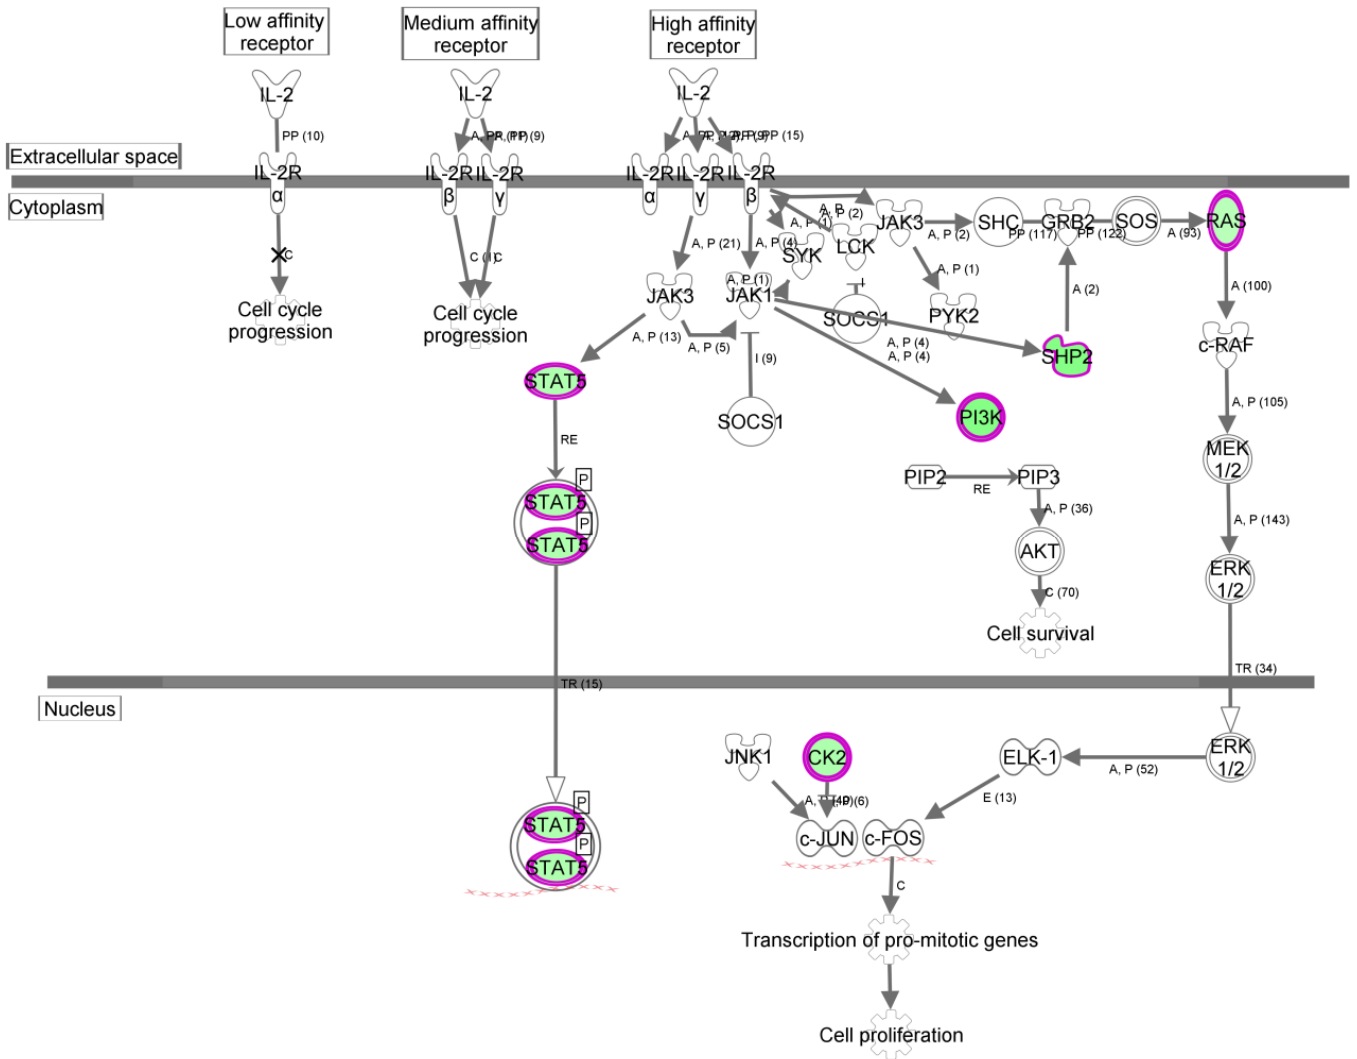

# 18. IL-8 signaling

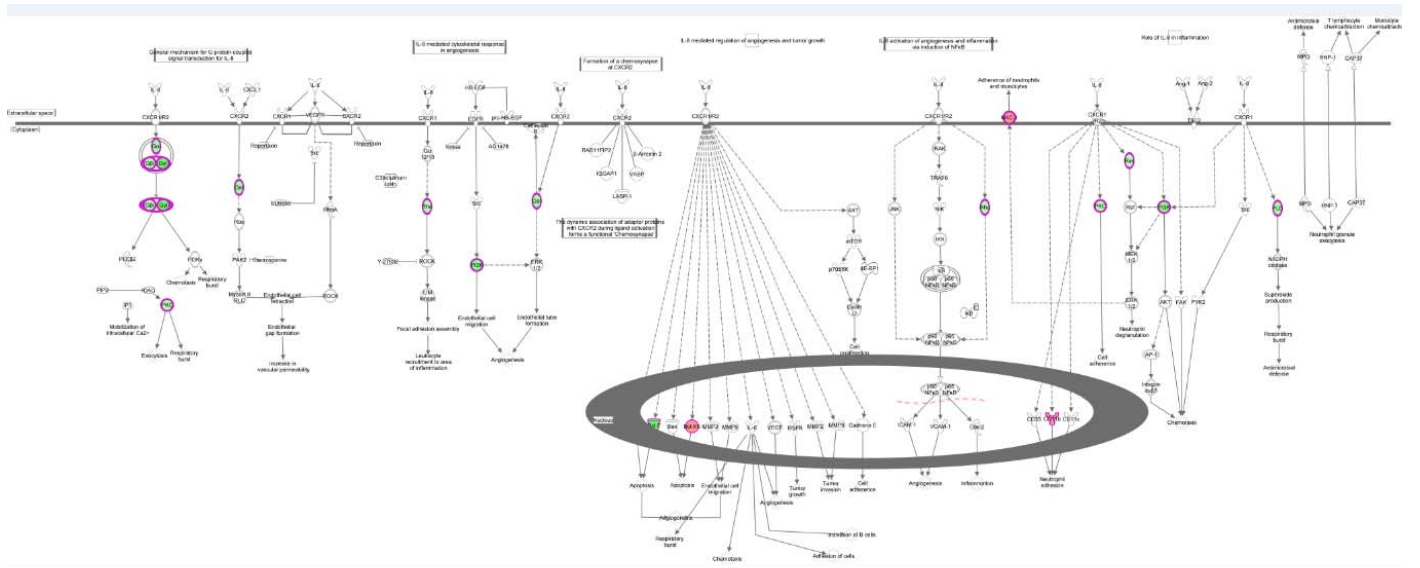

# 19. Integrin signaling

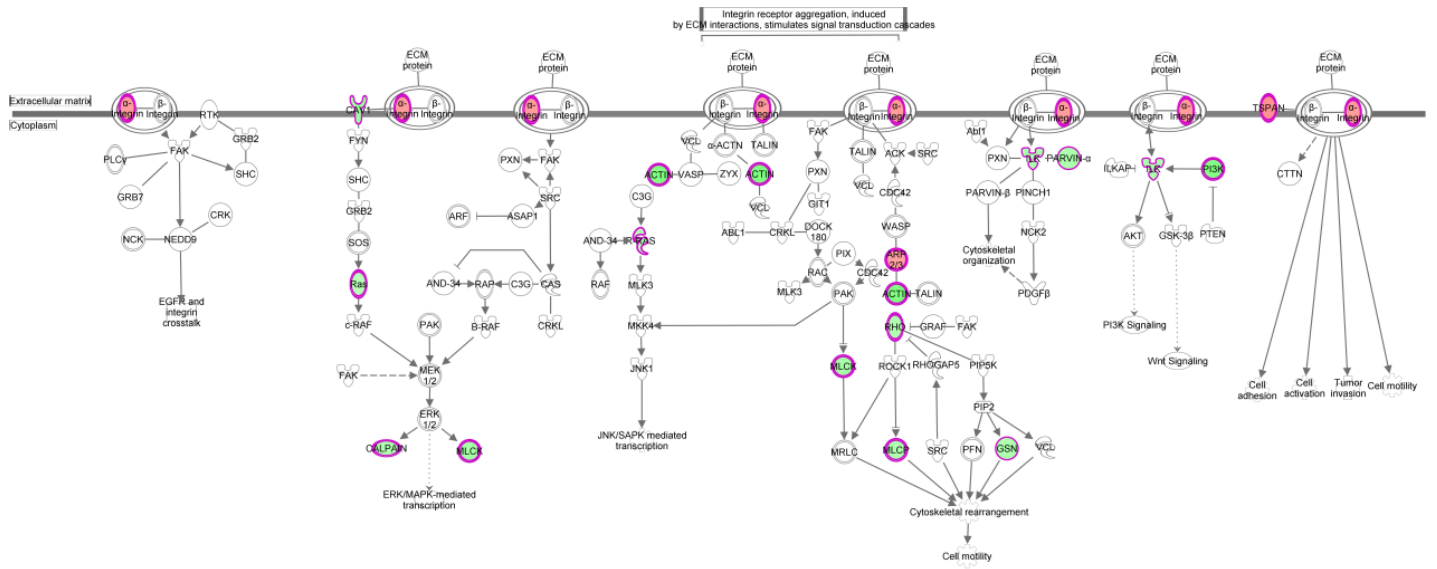

## 20. mTOR signaling

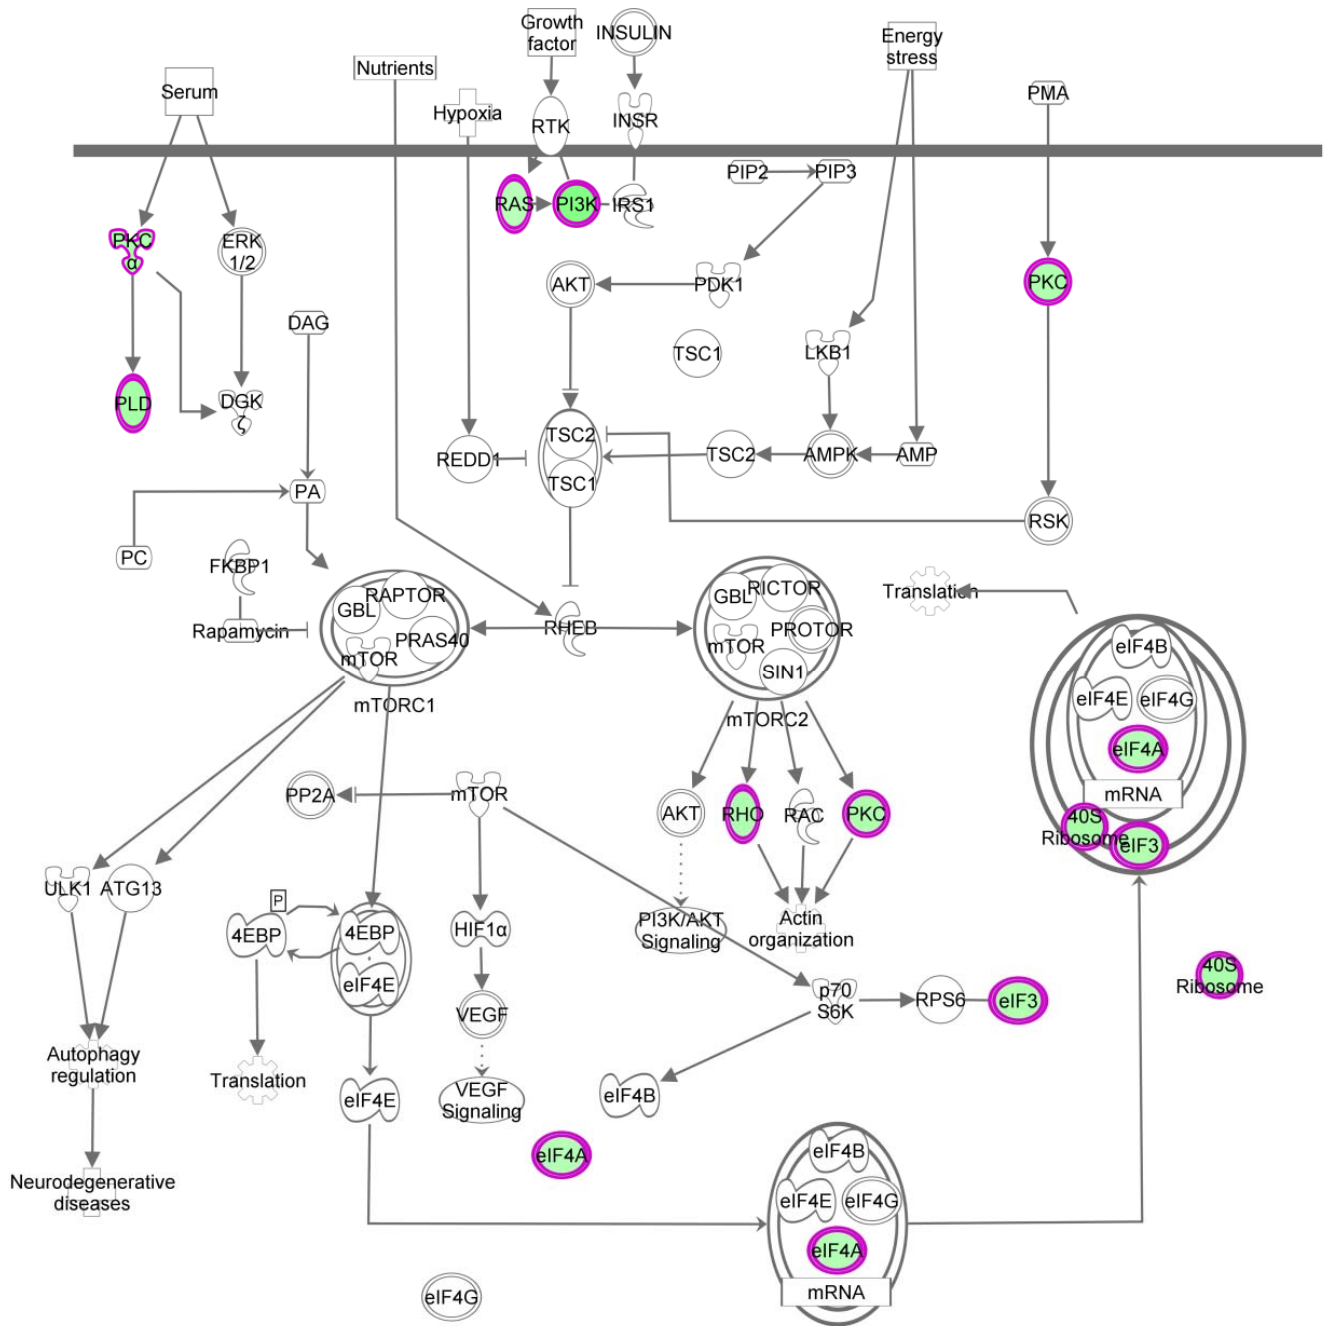

## 21. Ovarian cancer signaling

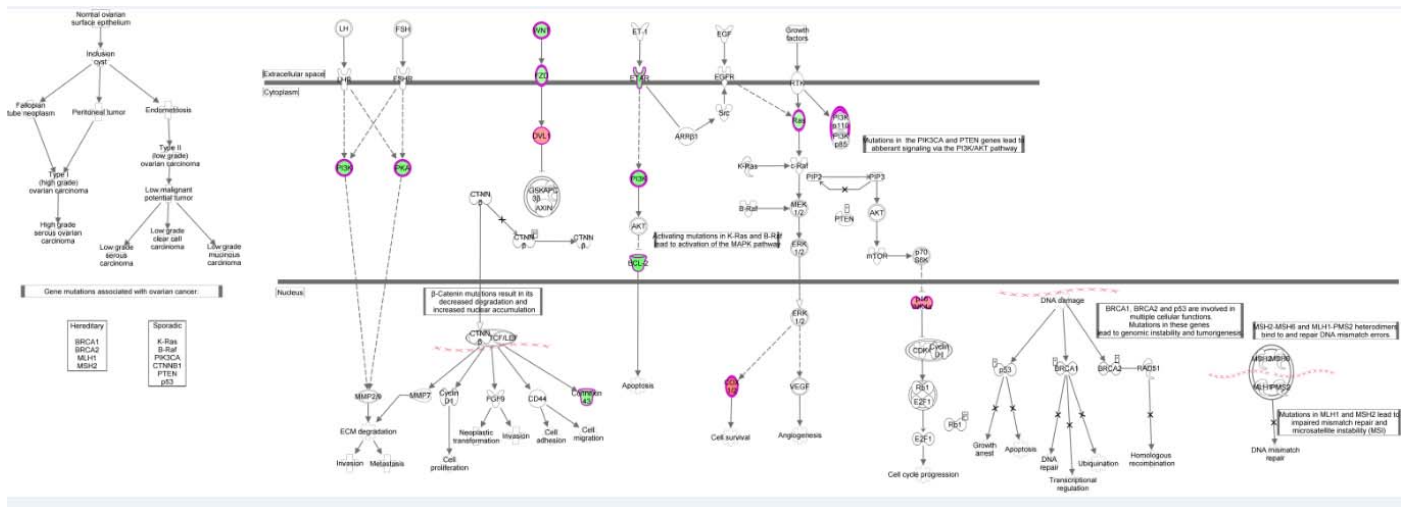

## 22. Oxidative phosphorylation

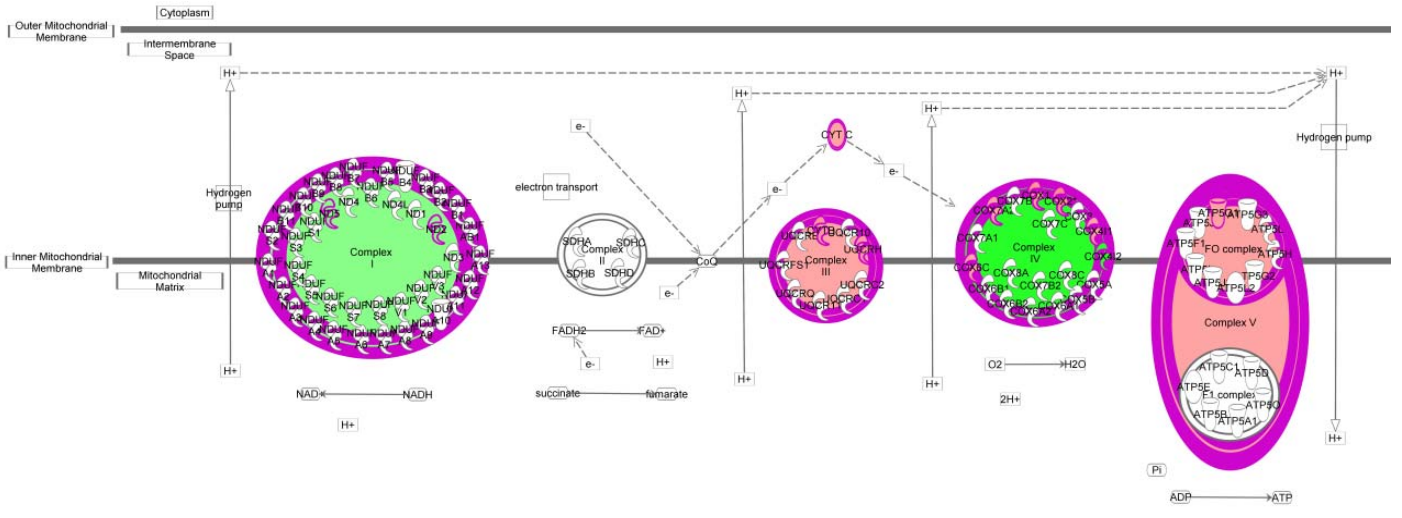

### 23. P2Y Purigenic receptor signaling pathway

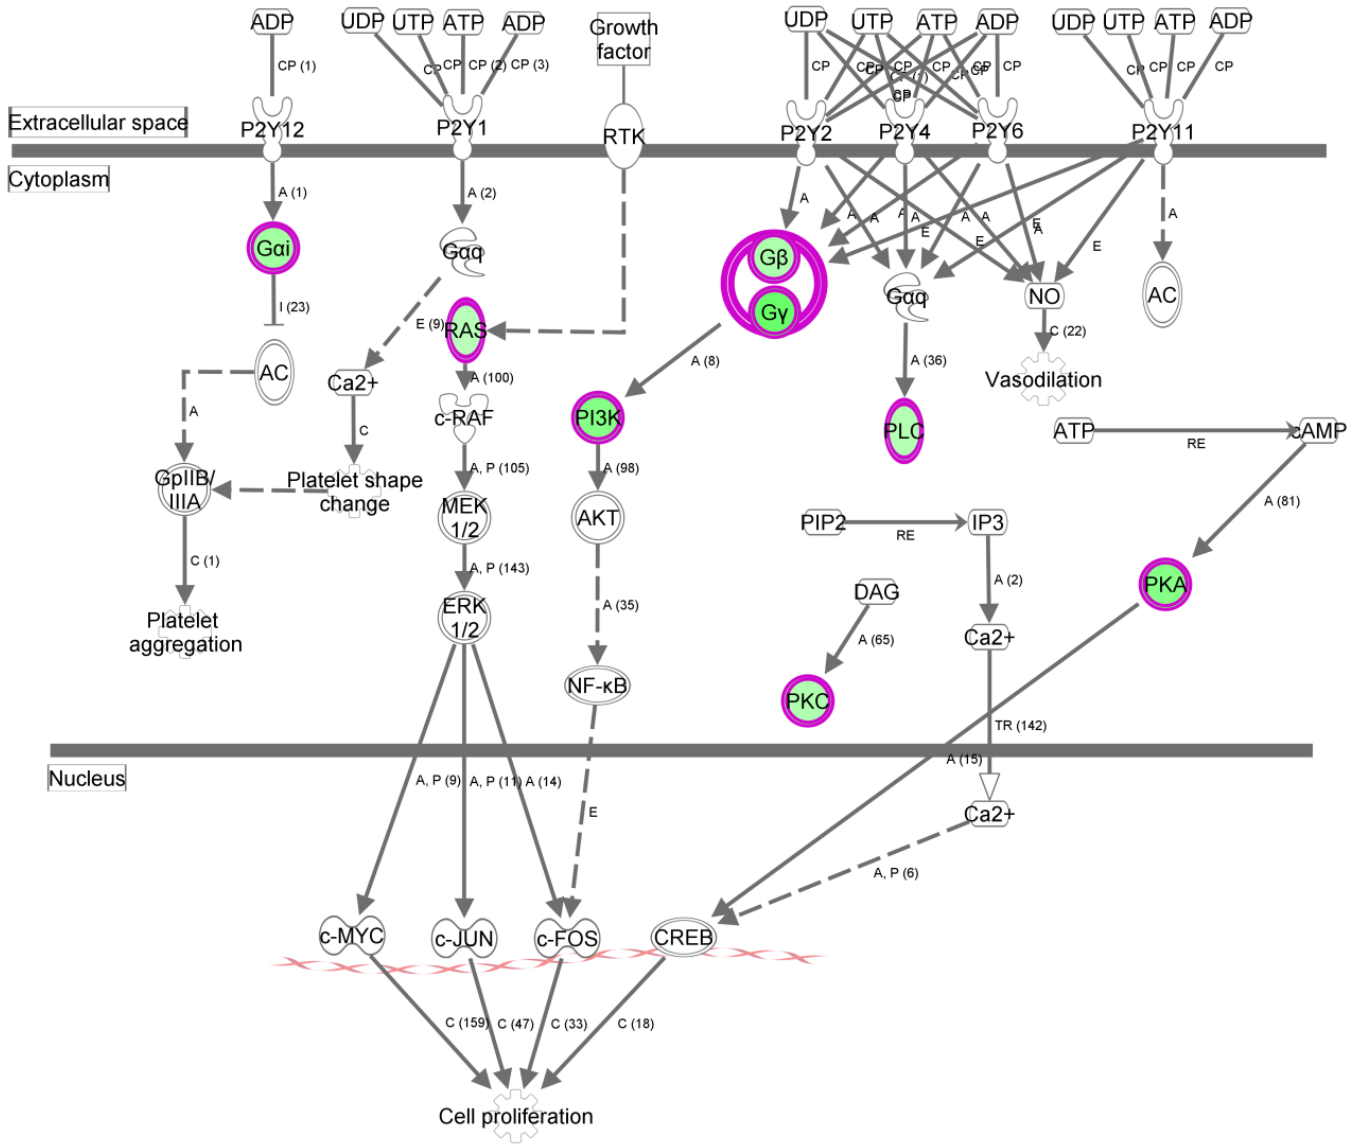



## 24. Phospholipase c signaling

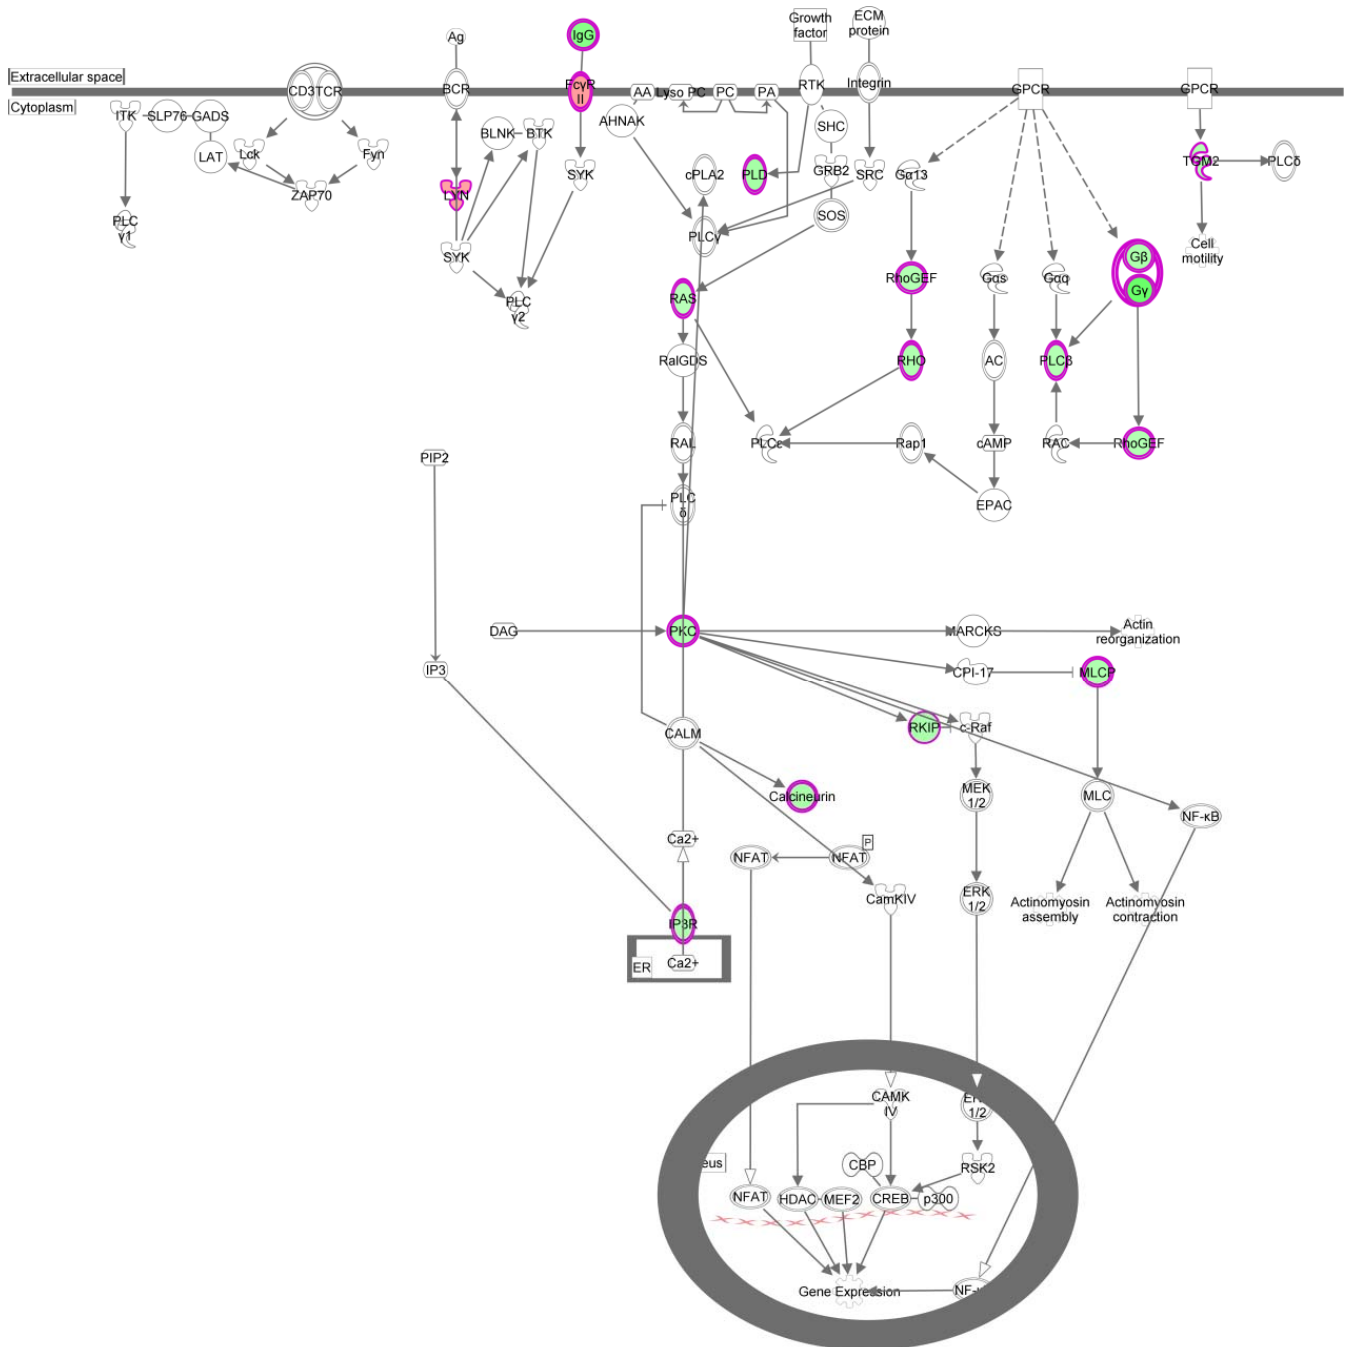

## 25. Signaling by Rho family GTPases

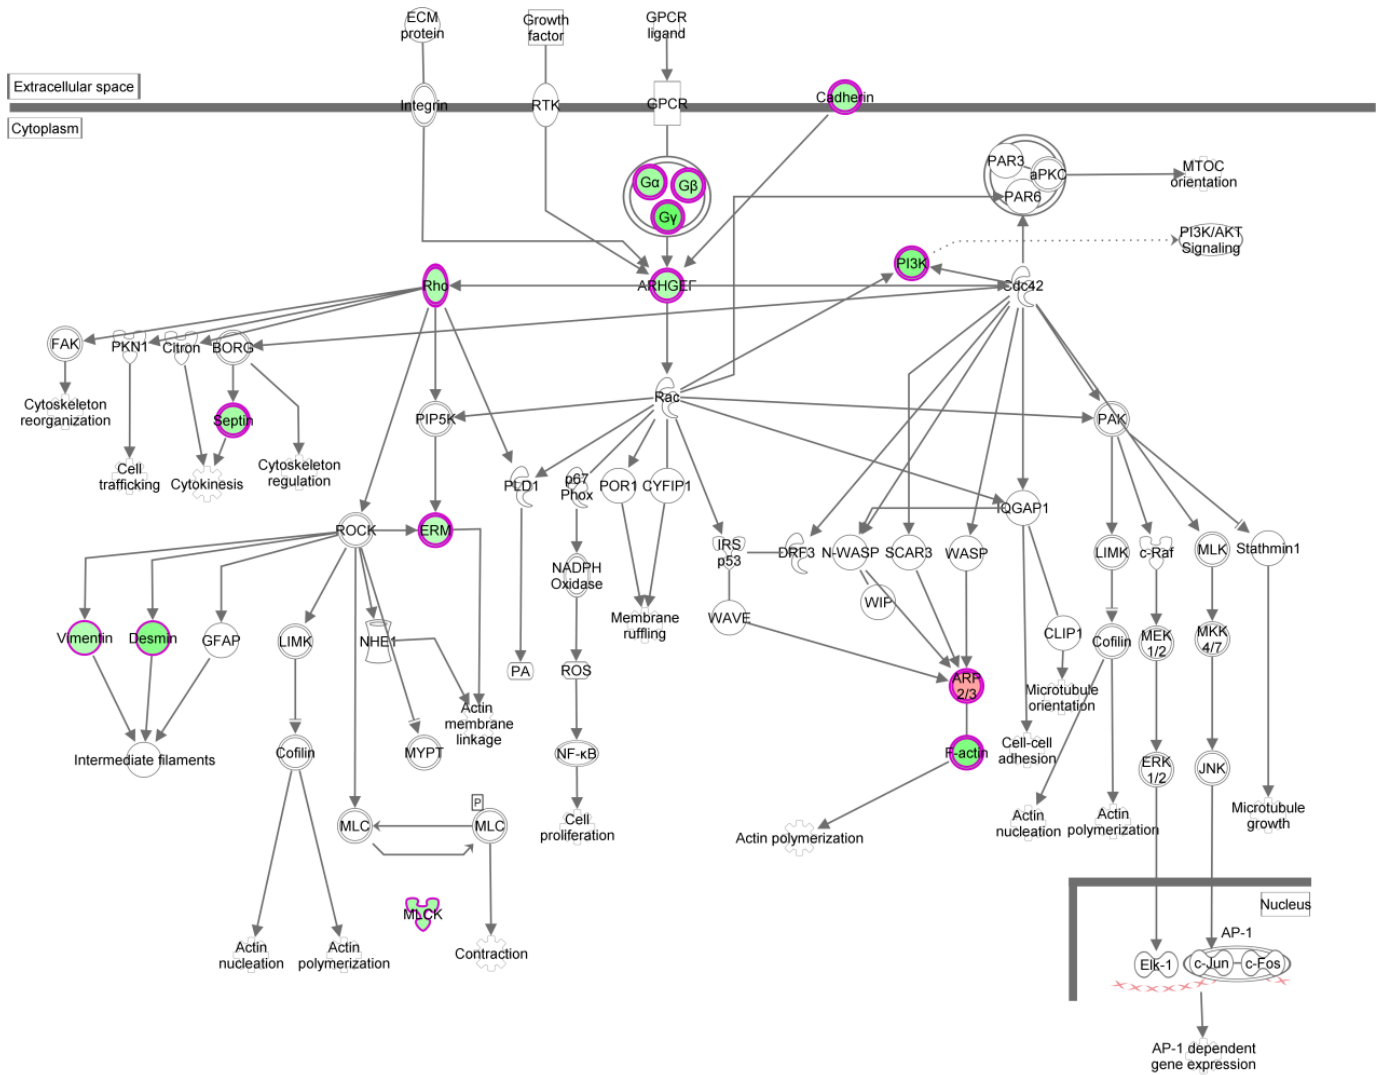

## 26. Antiproliferative role of somatostatin signaling

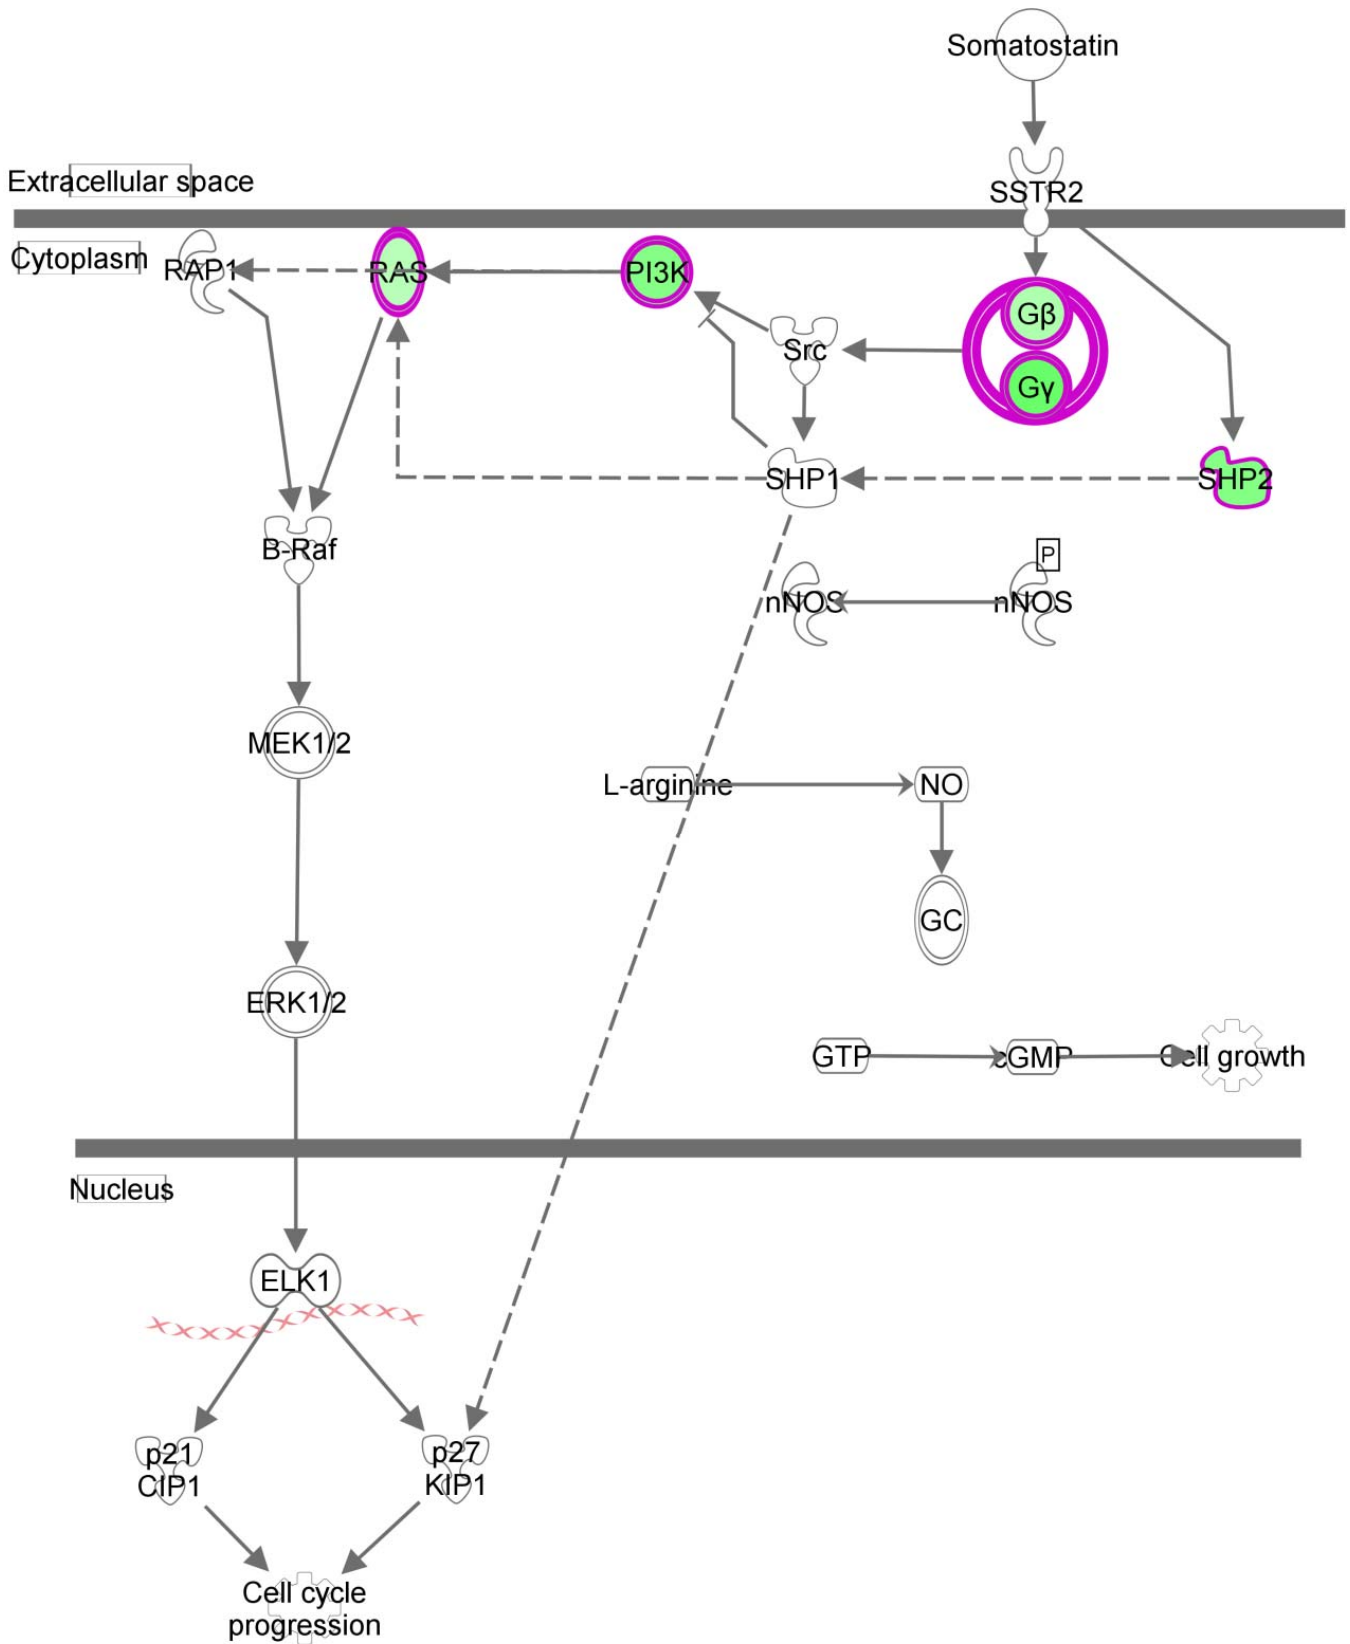

## 27. Tec kinase signaling

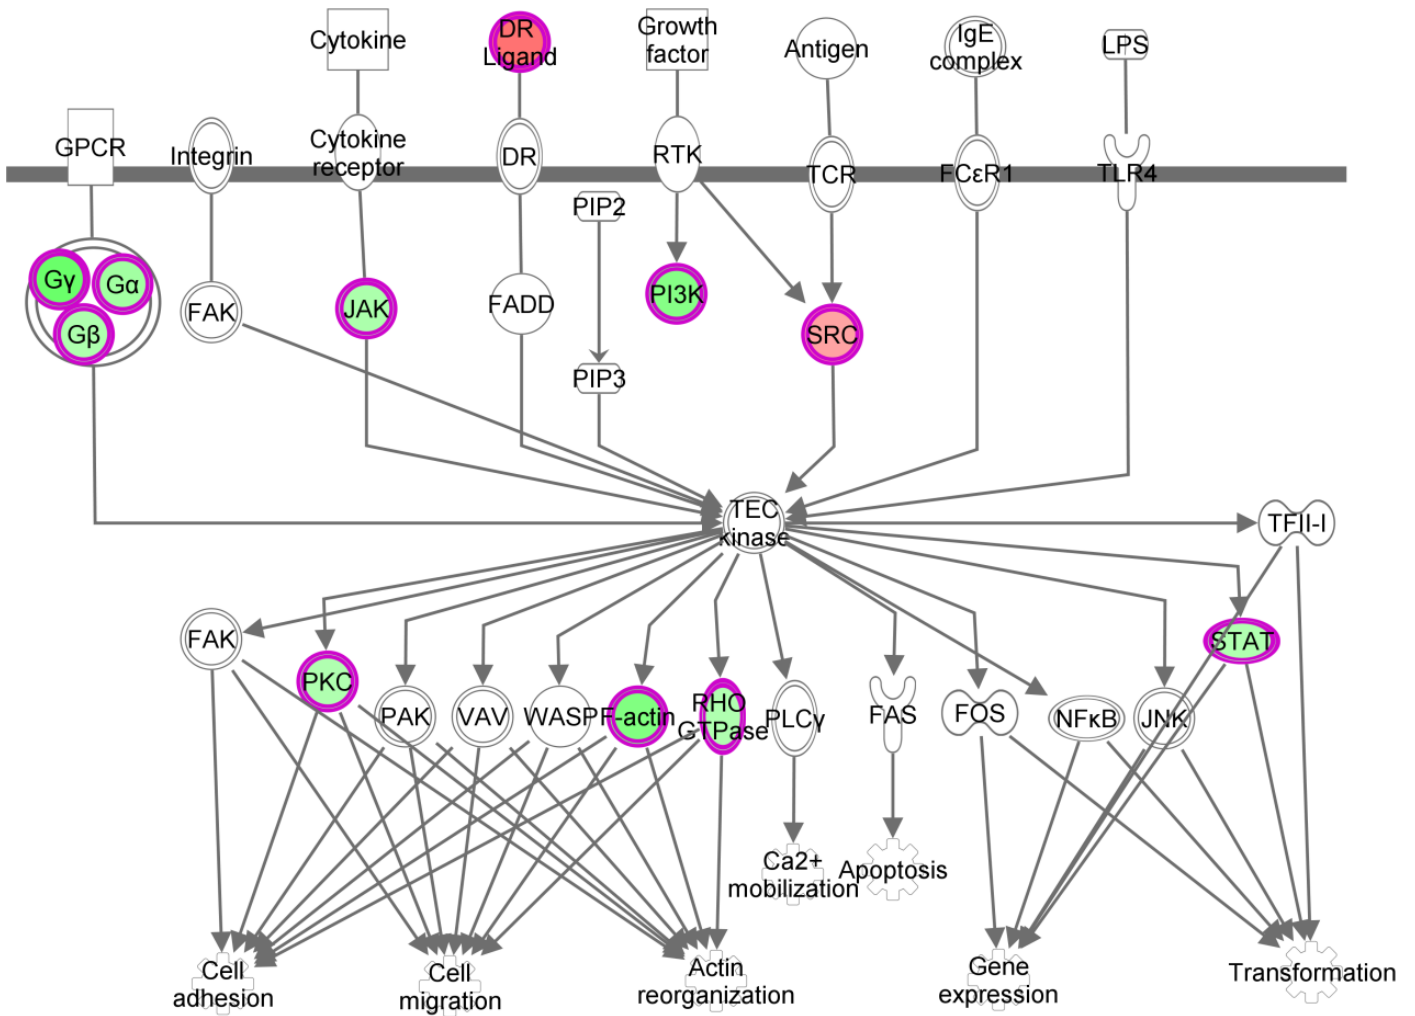

## 28. Thrombin signaling

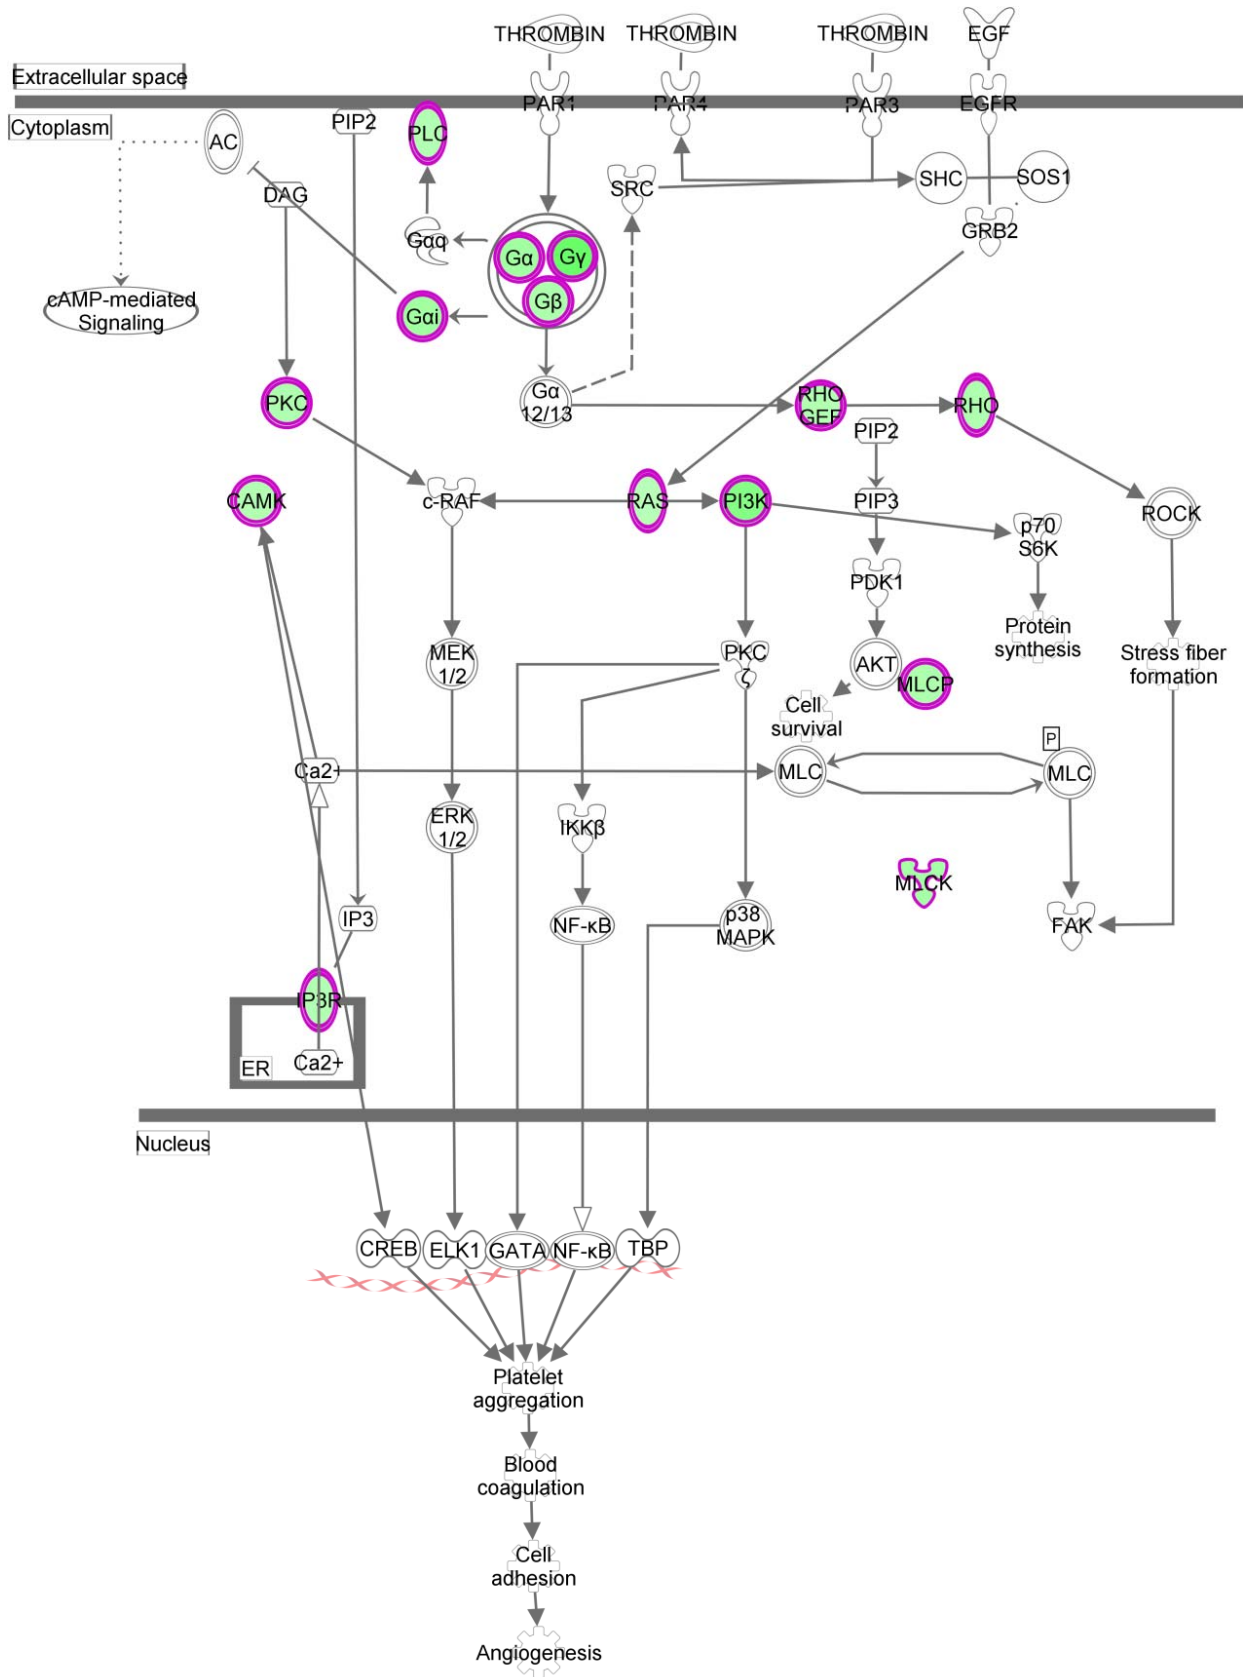

Supplement: 13167_2019_170_MOESM1_ESM.pdf [file 13167_2019_170_MOESM1_ESM.pdf]
