# Supplementary material for: Signaling pathway network alterations in human ovarian cancers identified with quantitative mitochondrial proteomics
Source: PubMed Central journal article supplement (PMC6562010; doi:10.1007/s13167-019-00170-5), 2019-06-08

# Supplementary Figure 2

Molecular and cellular functions provide some significant tumor-related molecules.

1. Cell death and survival (including apoptosis, cell death, cell survival, cell viability, necrosis).
2. Cell movement.
3. Cell-to-cell signaling and interaction.
4. Free radical scavenging.
5. Lipid metabolism.

## 1. Apoptosis

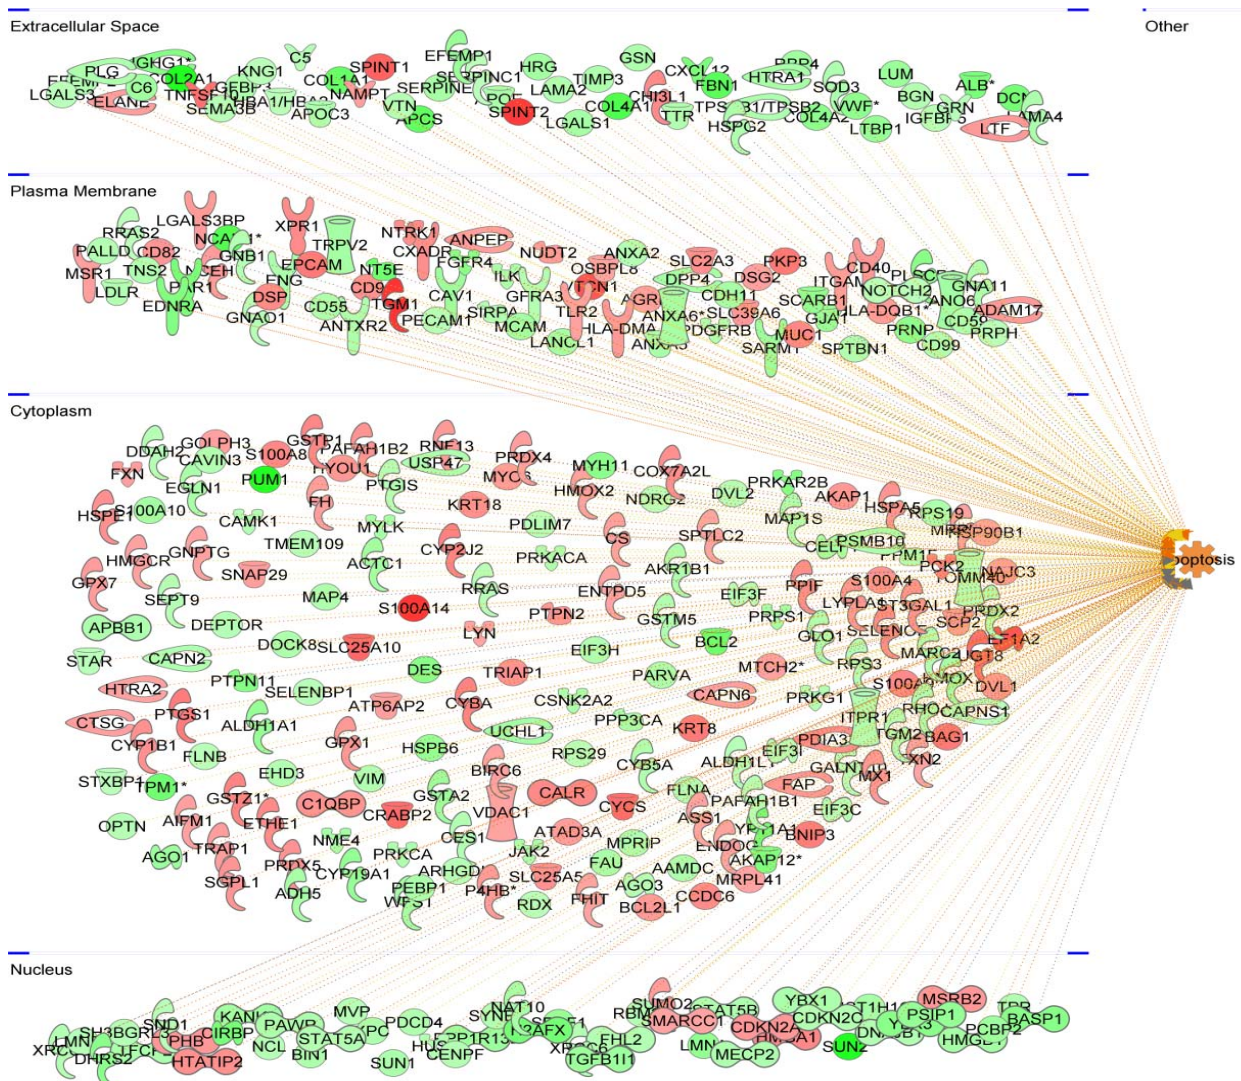

## 2. Cell death

Extracellular Space

Other

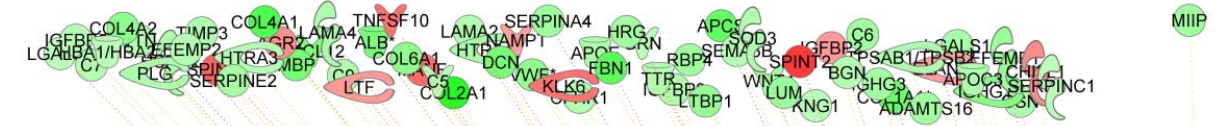

Plasma Membrane

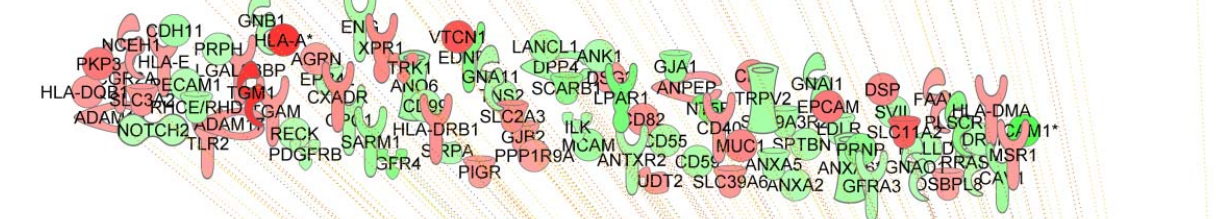

Cytoplasm

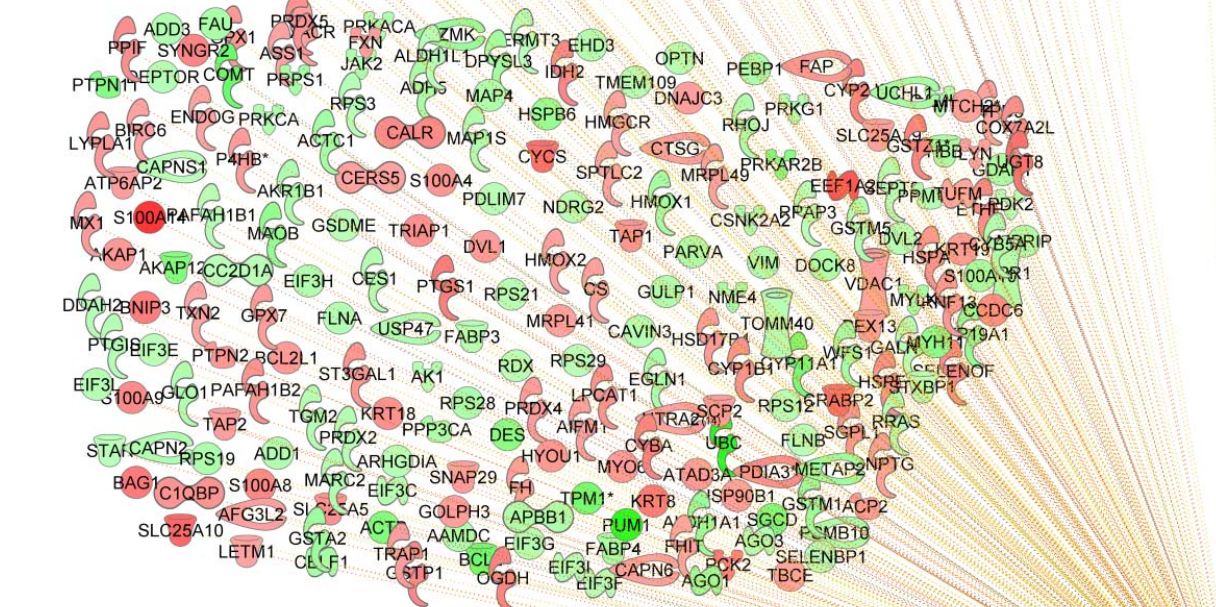

Nucleus

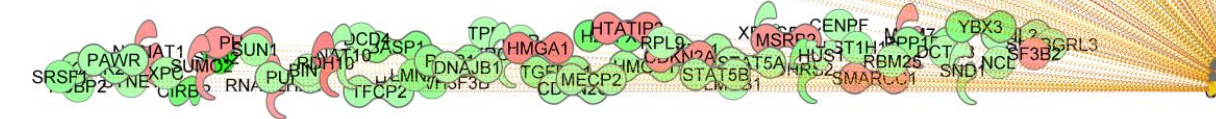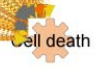

### 3. Cell survival

Extracellular Space

Other

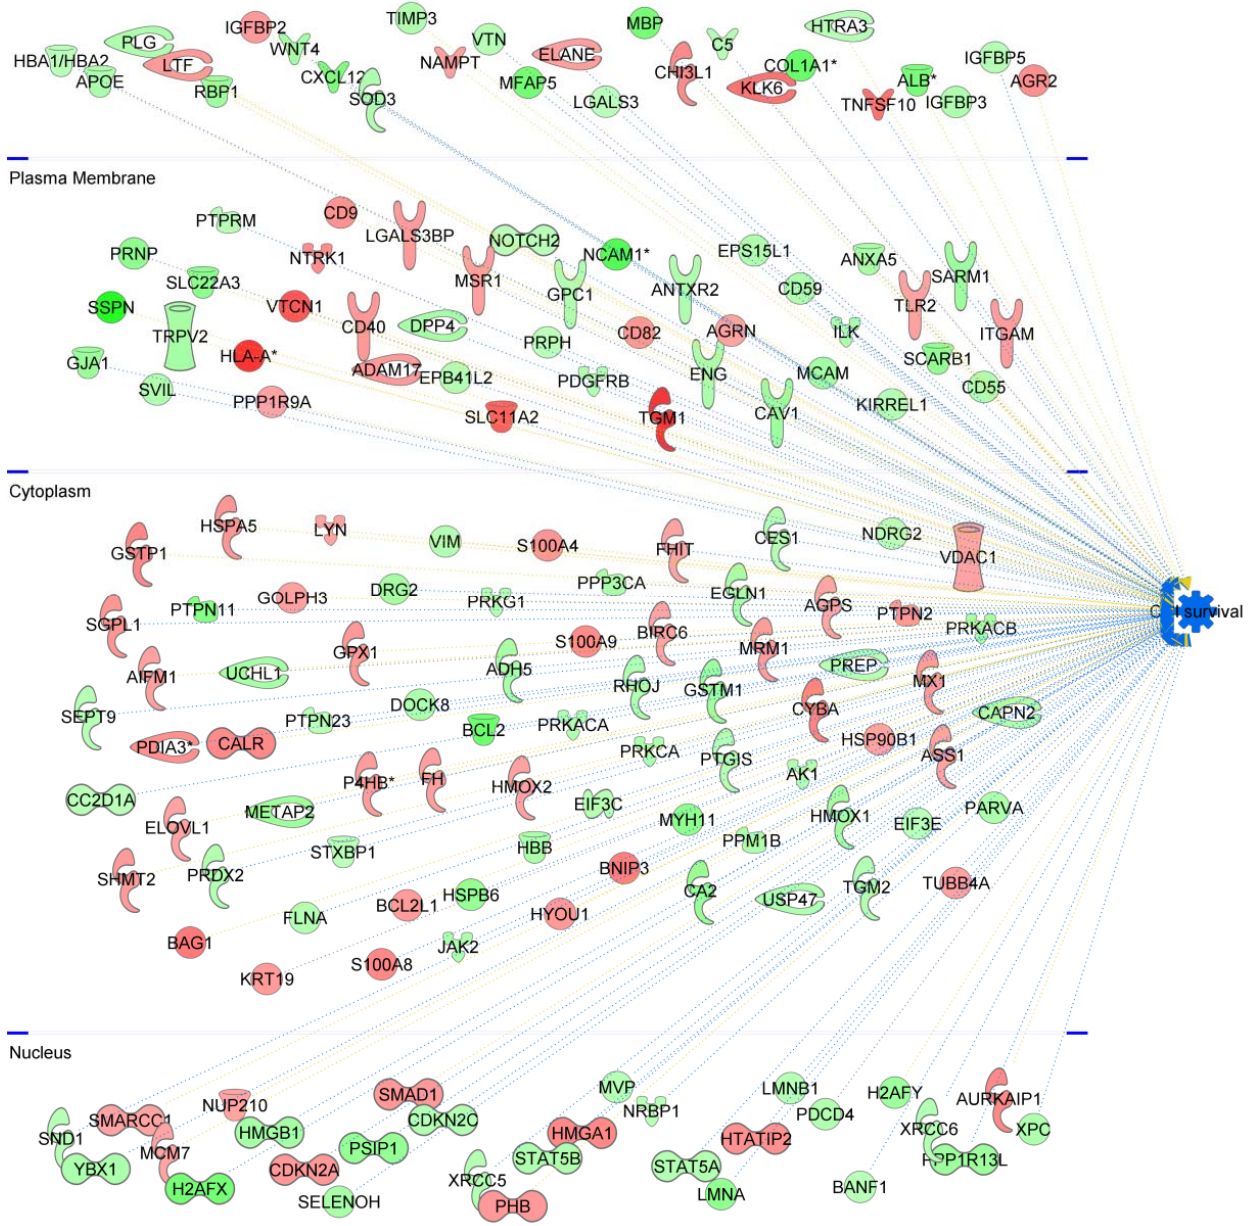

## 4. Cell viability

Extracellular Space

Other

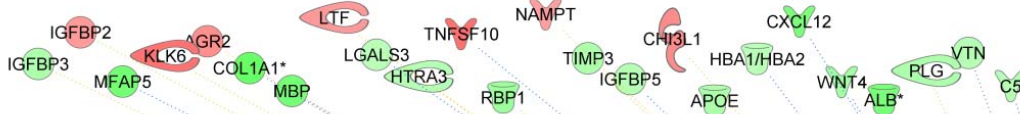

Plasma Membrane

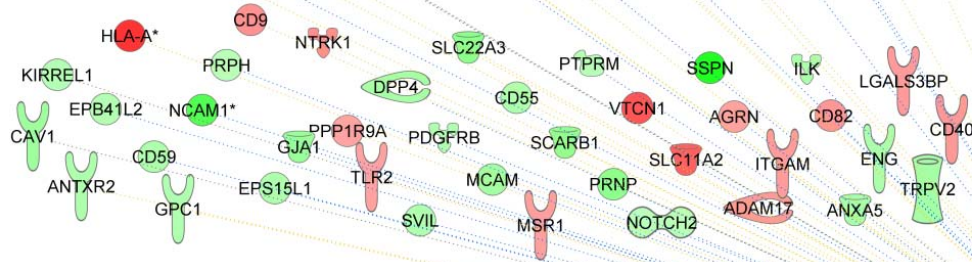

Cytoplasm

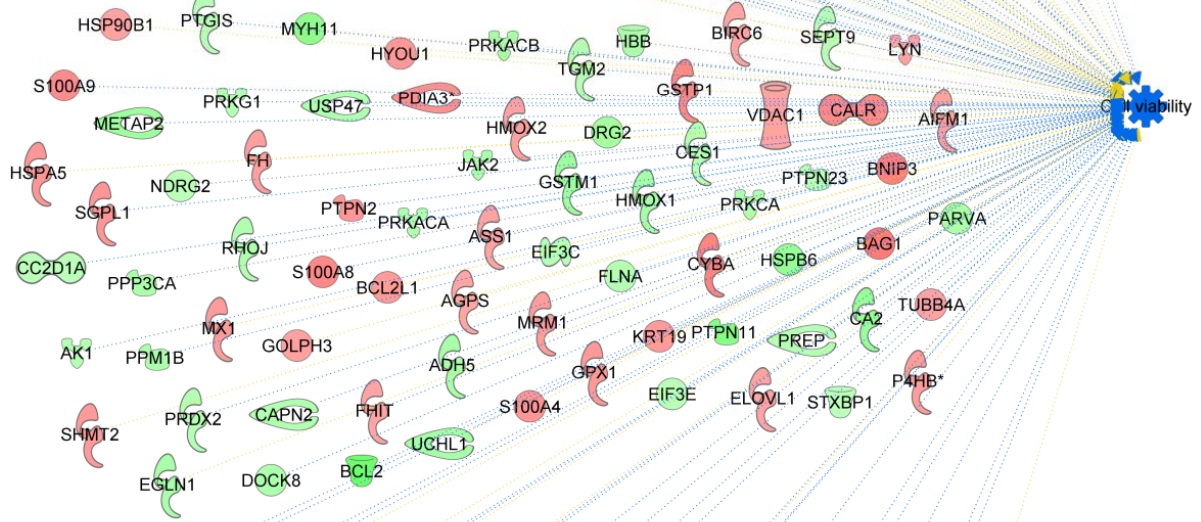

Nucleus

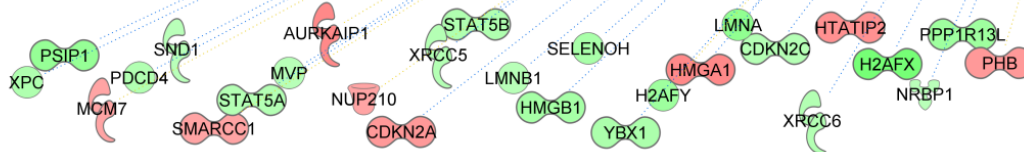

## 5. Necrosis

Extracellular Space

Other

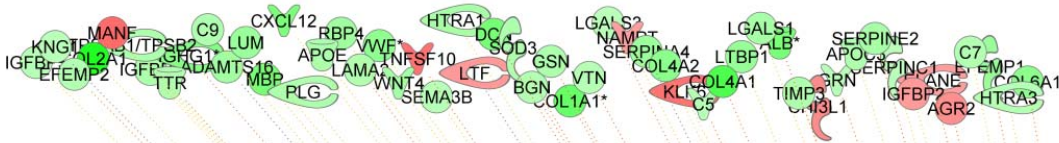

Plasma Membrane

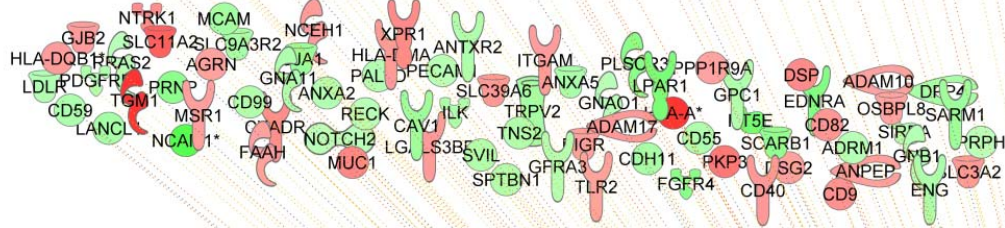

Cytoplasm

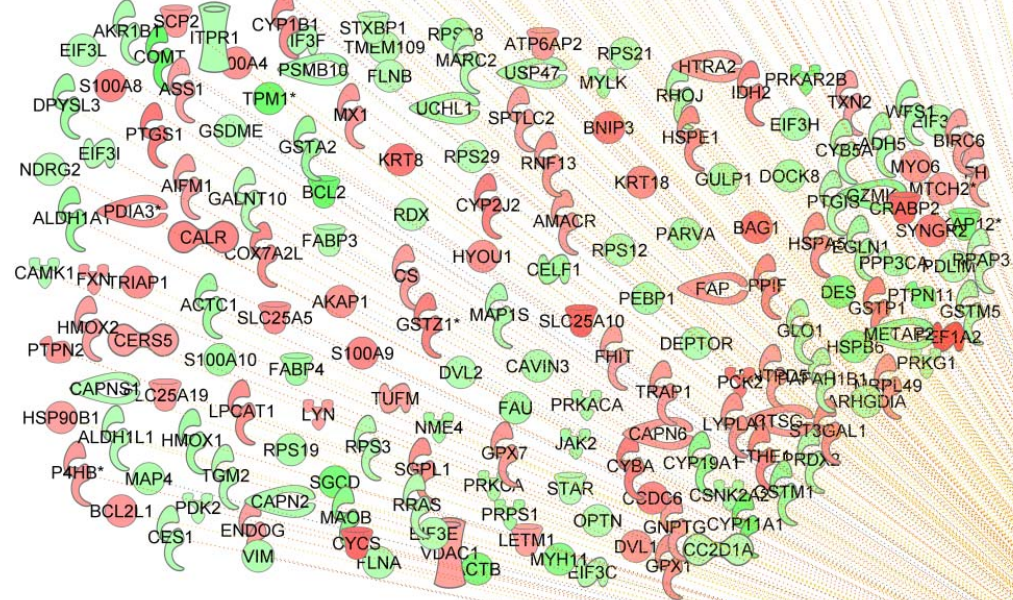

Nucleus

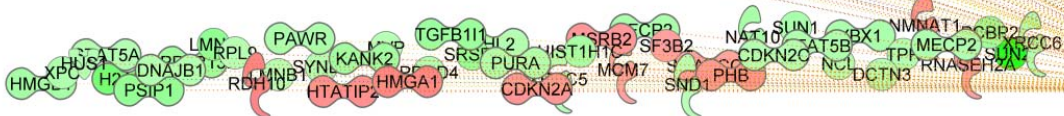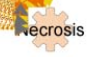

## 6. Cell movement

Extracellular Space

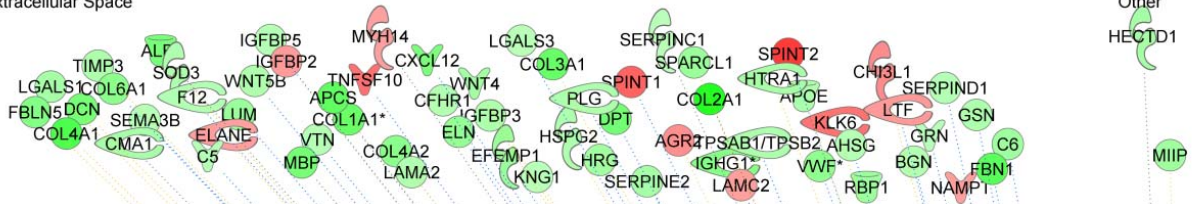

Other  
HECTD1

Plasma Membrane

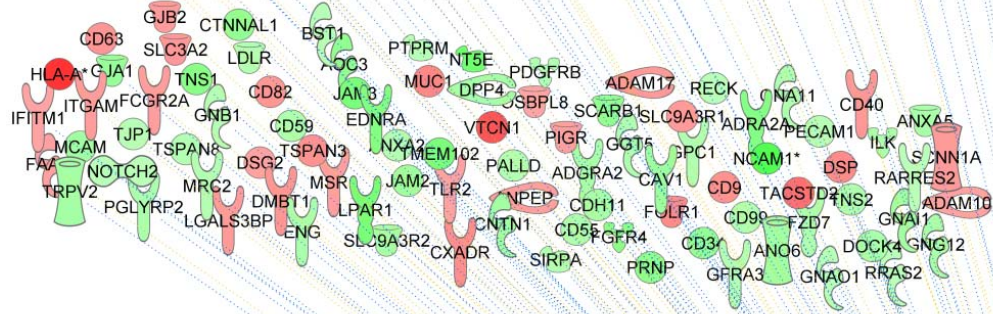

Cytoplasm

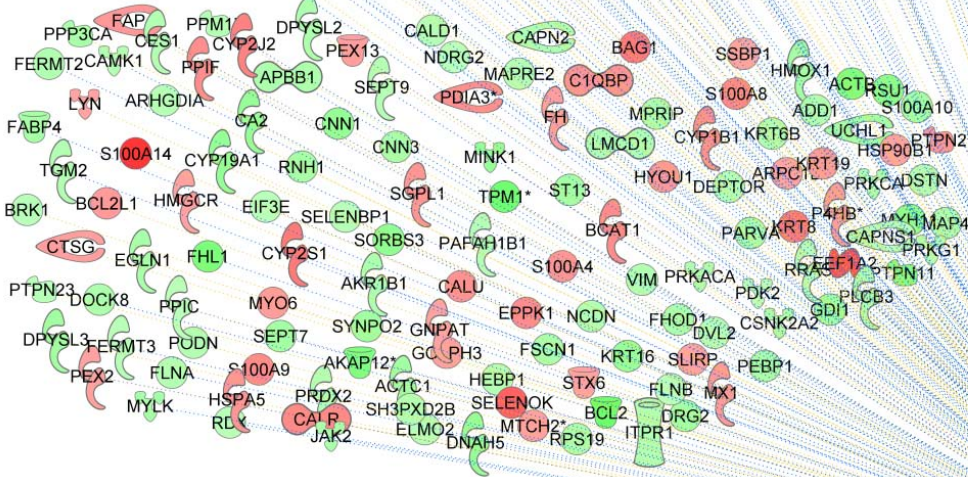

Nucleus

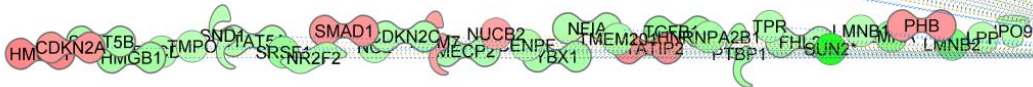

Cell movement

## 7. Cell-to-cell signaling and interaction

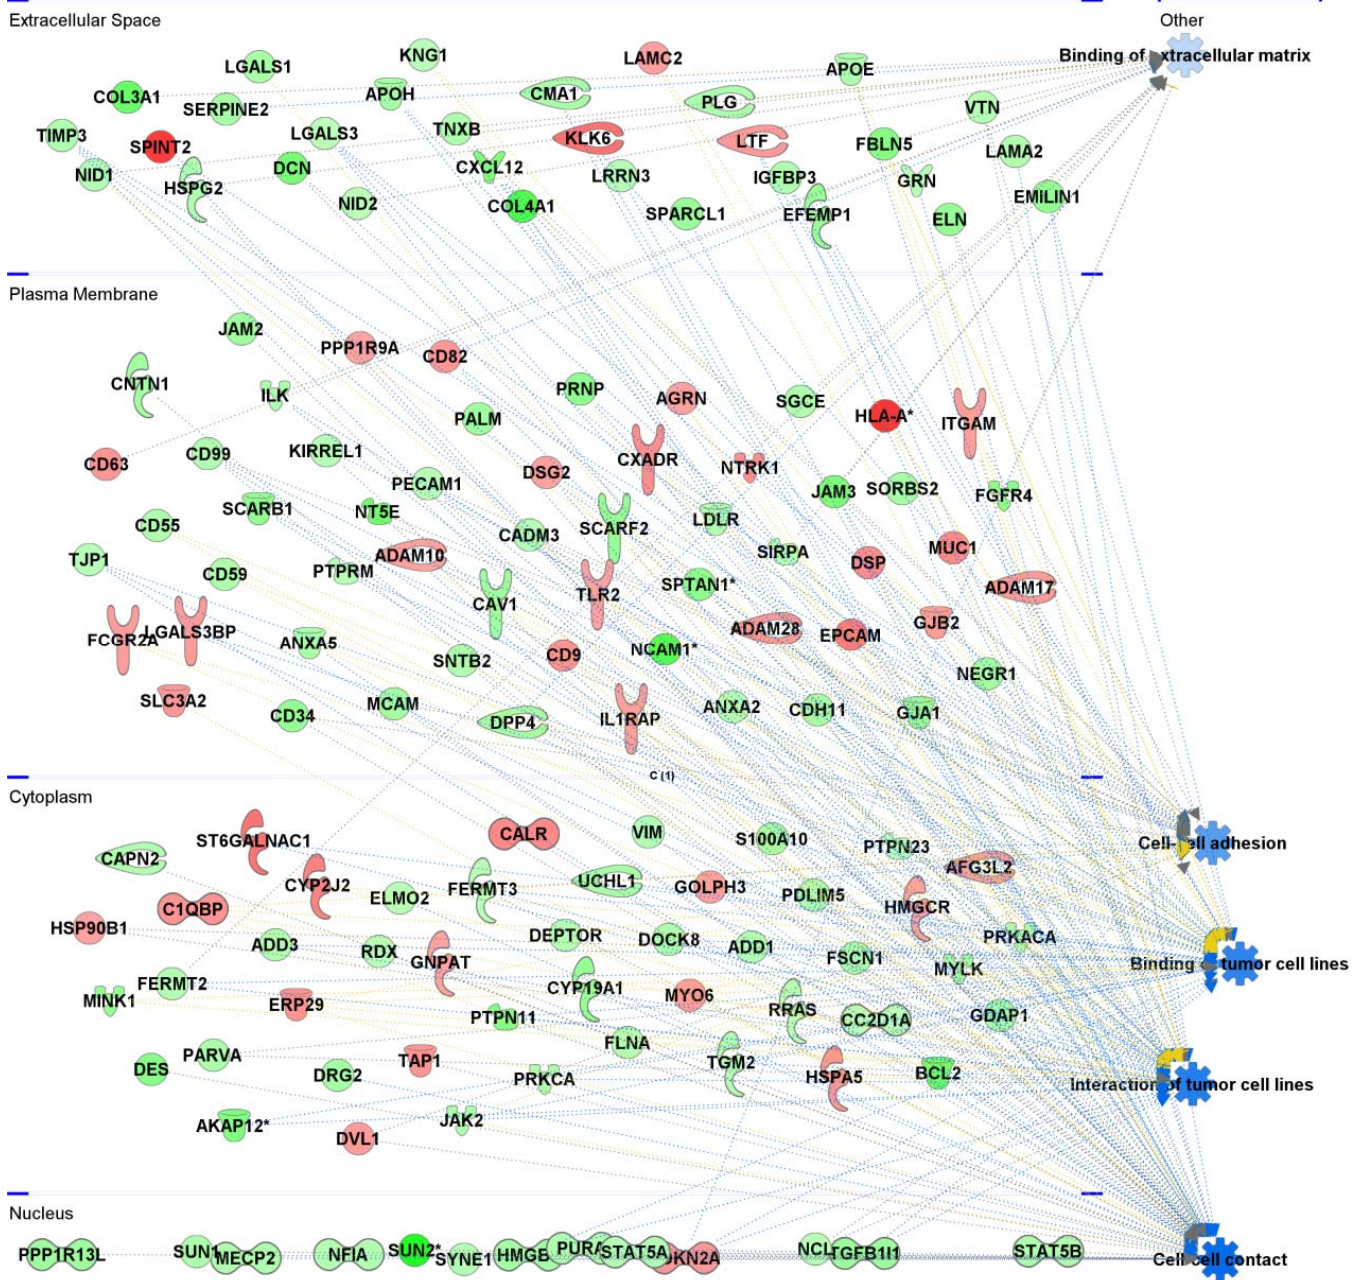

## 8. Free radical scavenging

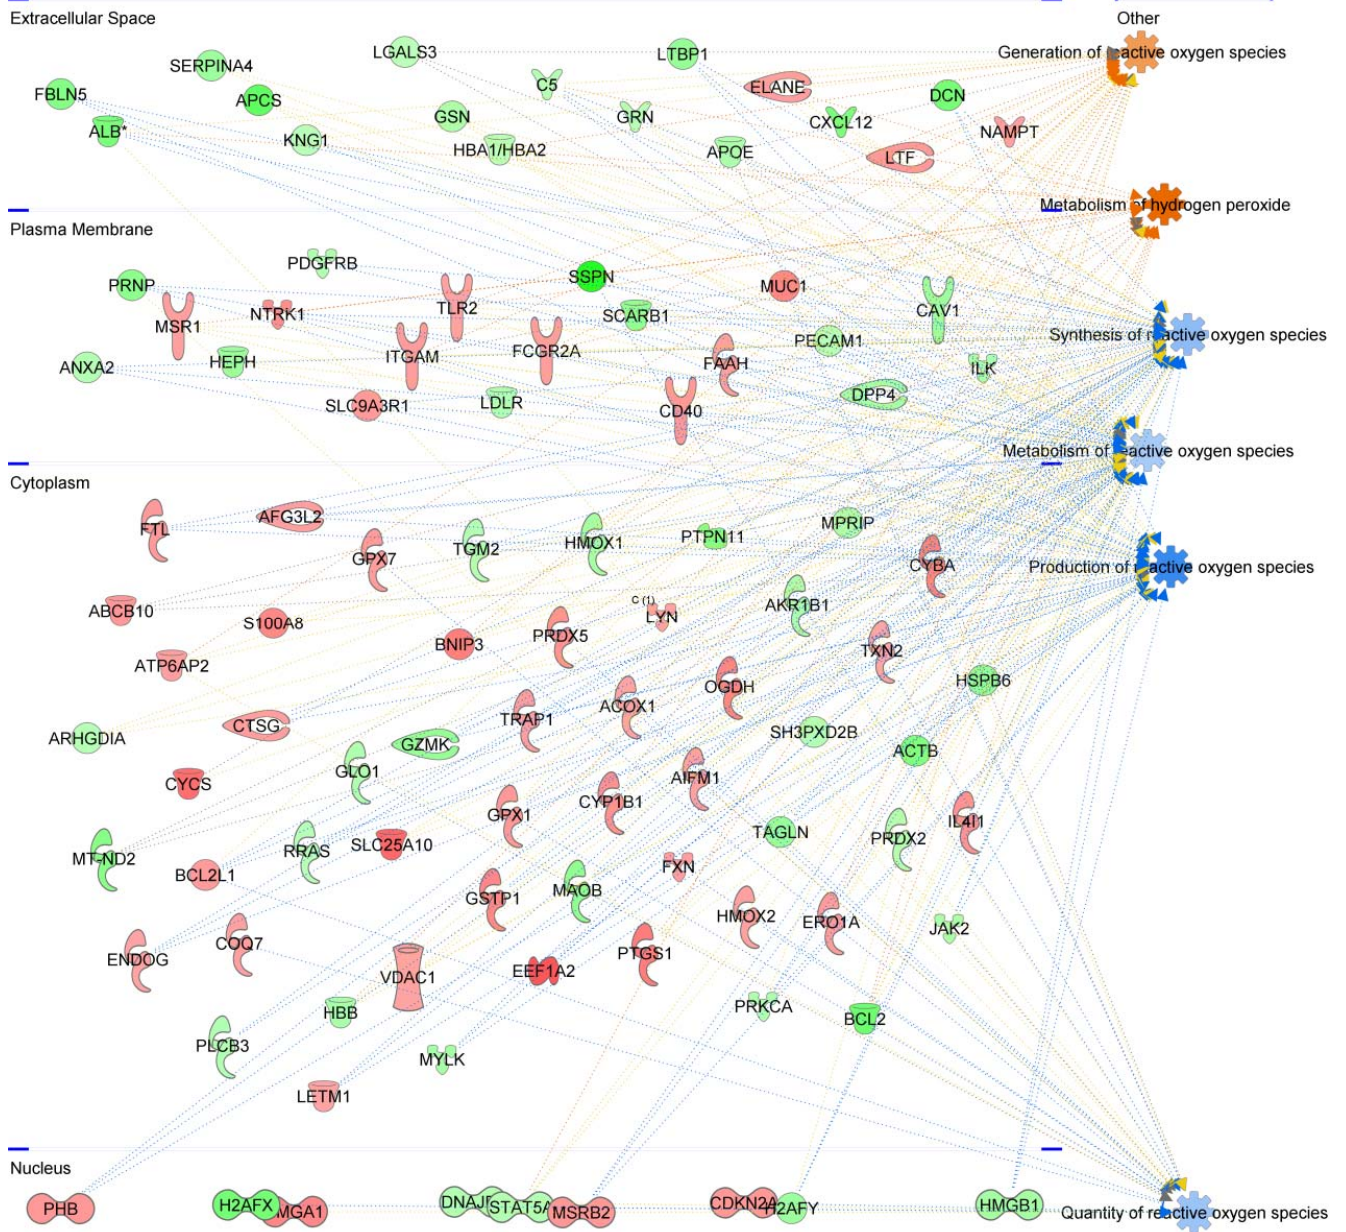



## 9. Lipid metabolism

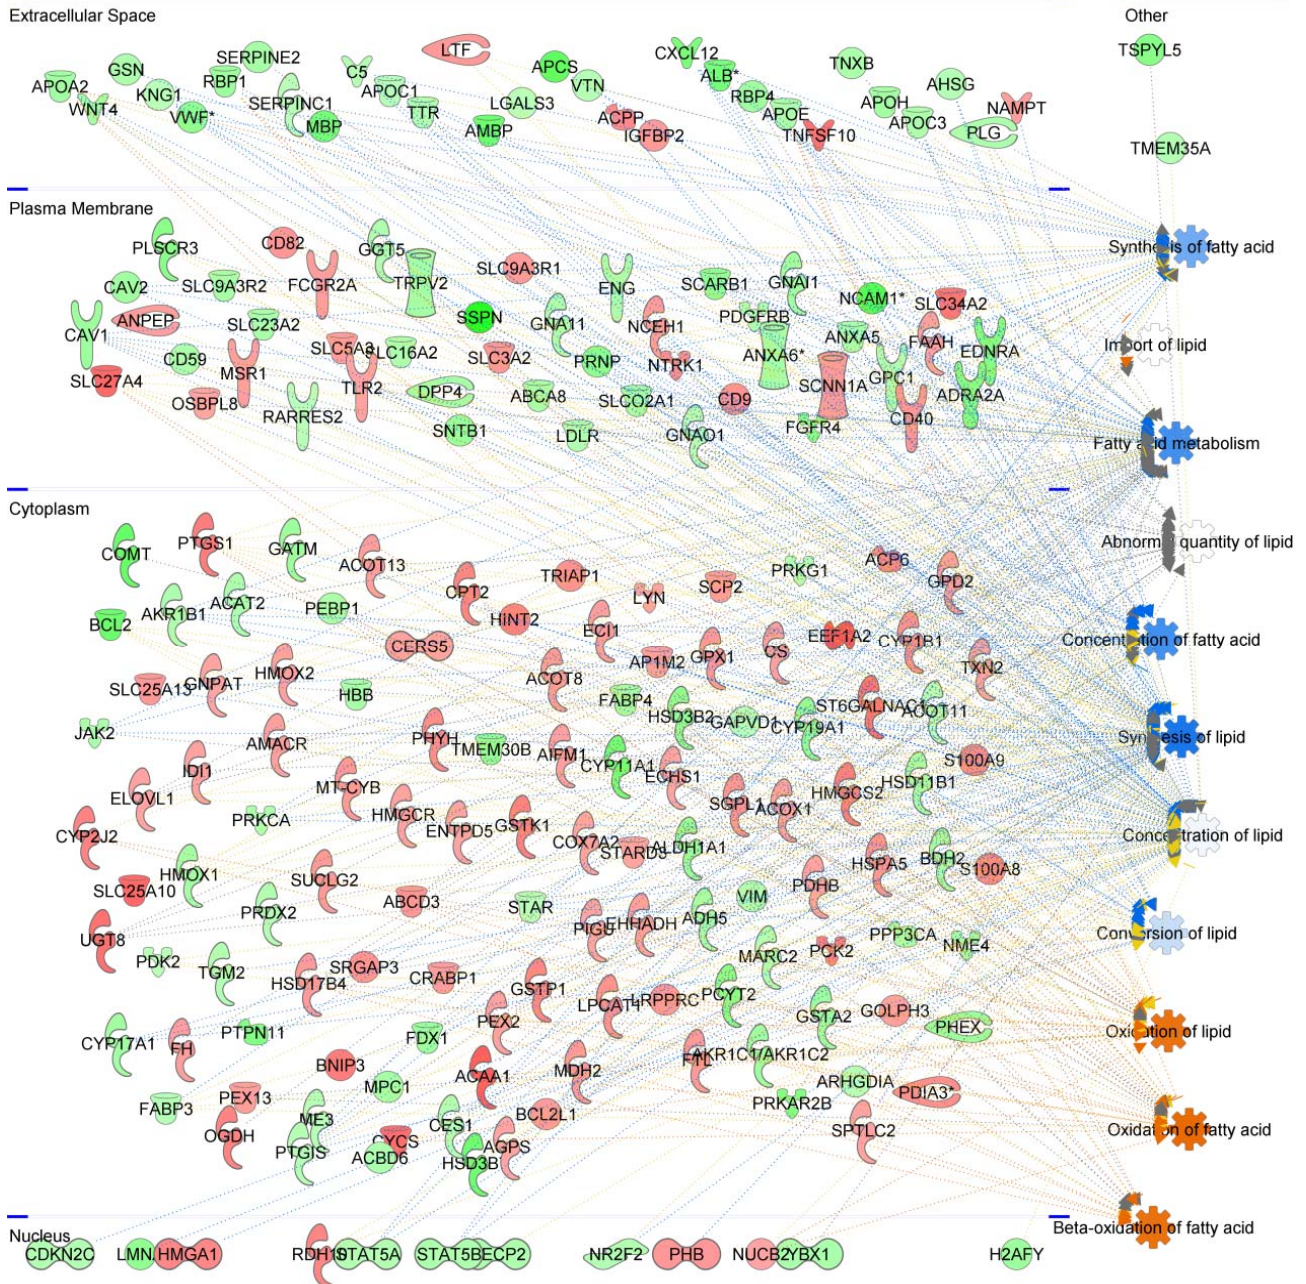

Supplement: 13167_2019_170_MOESM2_ESM.pdf [file 13167_2019_170_MOESM2_ESM.pdf]
