# Supplementary material for: Signaling pathway network alterations in human ovarian cancers identified with quantitative mitochondrial proteomics
Source: PubMed Central journal article supplement (PMC6562010; doi:10.1007/s13167-019-00170-5), 2019-06-08

## Supplementary figure 4

The KMplot analysis revealed that 62 of 102 hub molecules resulted in significant ovarian cancer overall survival (50 none reported molecules).

### 1.ADH5

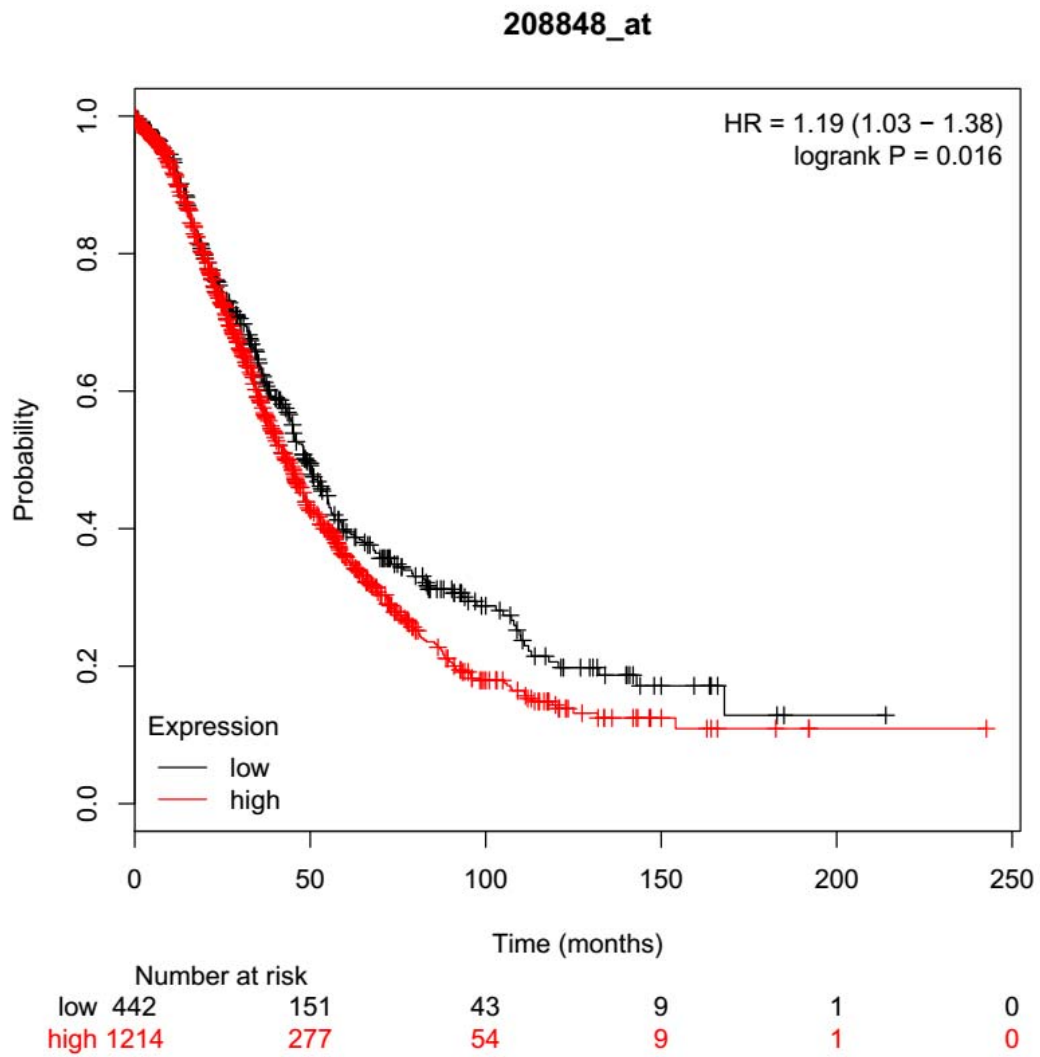

2. ADRA2A

209869\_at

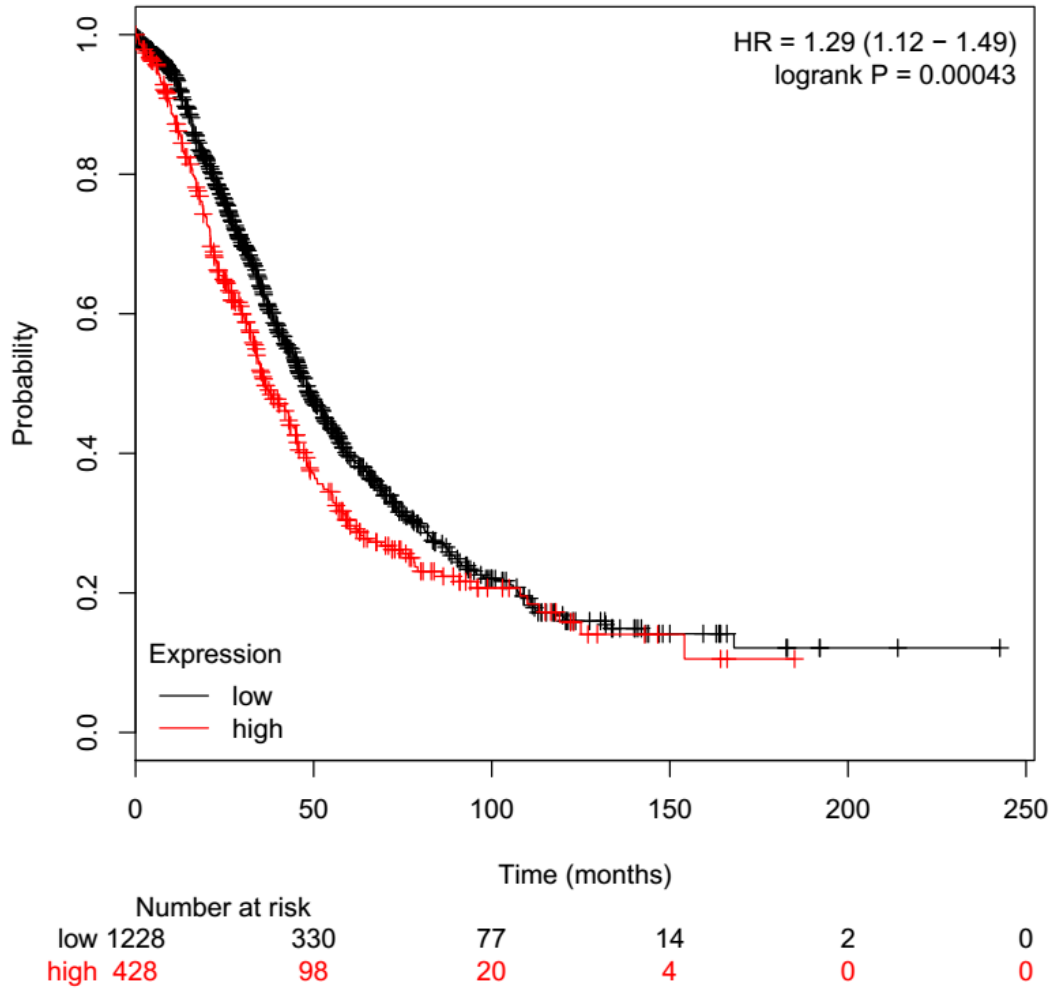

3. ASPN

219087\_at

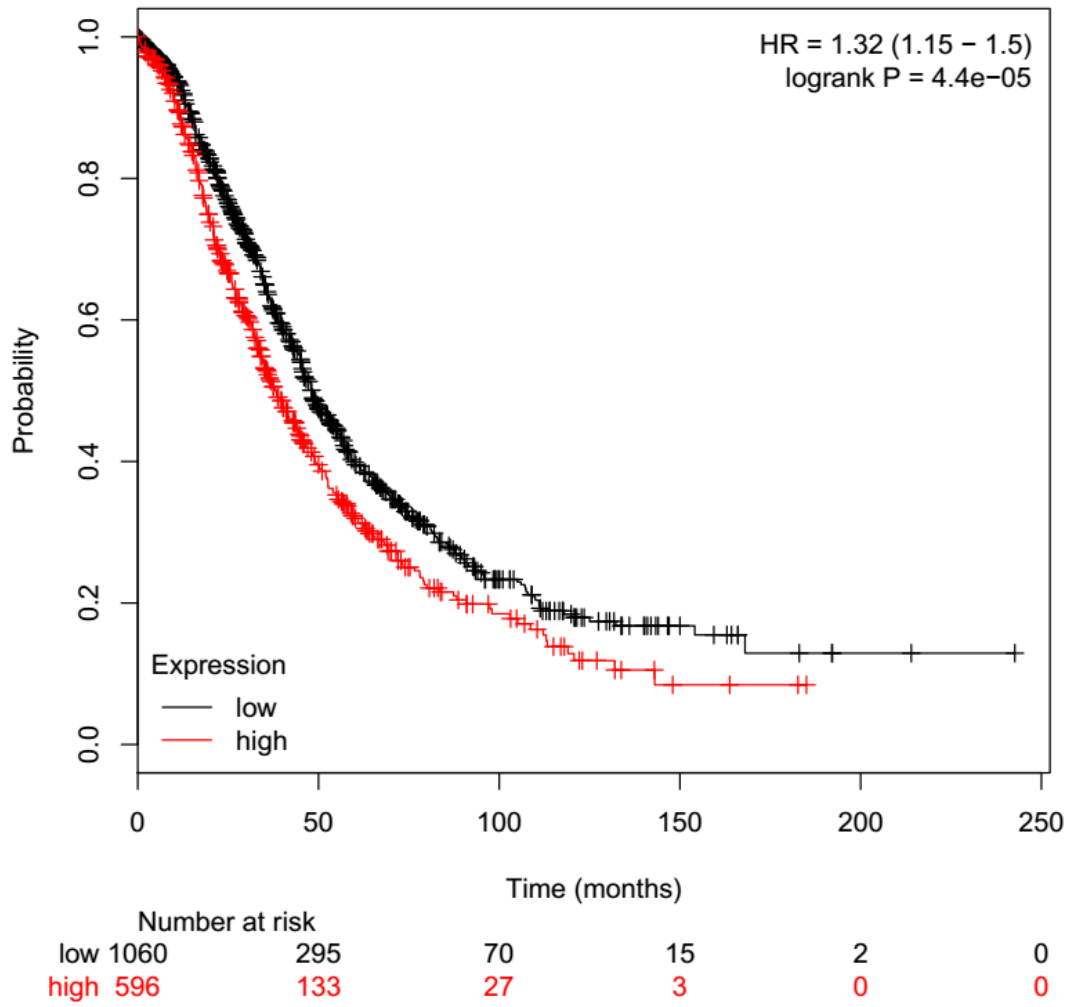

4. BDH2

235155\_at

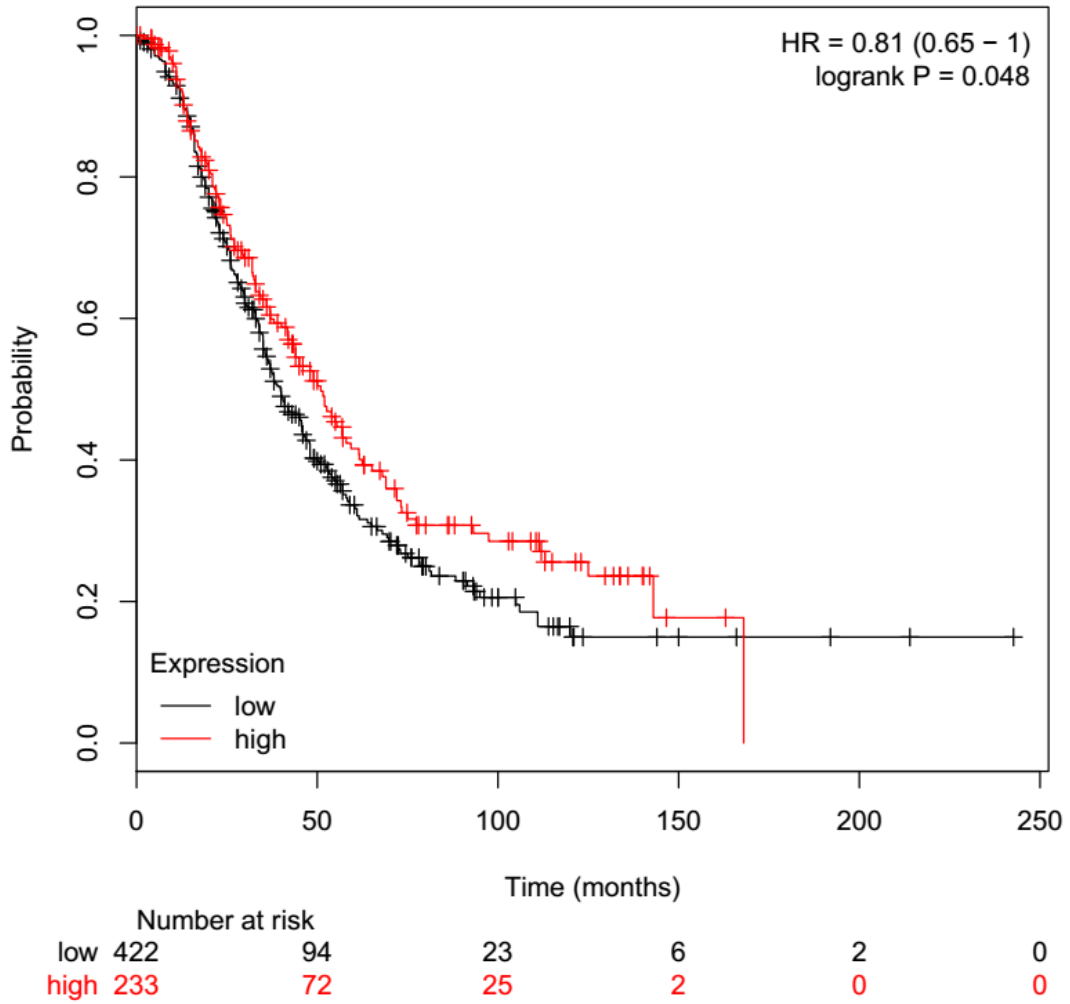

5. COL3A1

211161\_s\_at

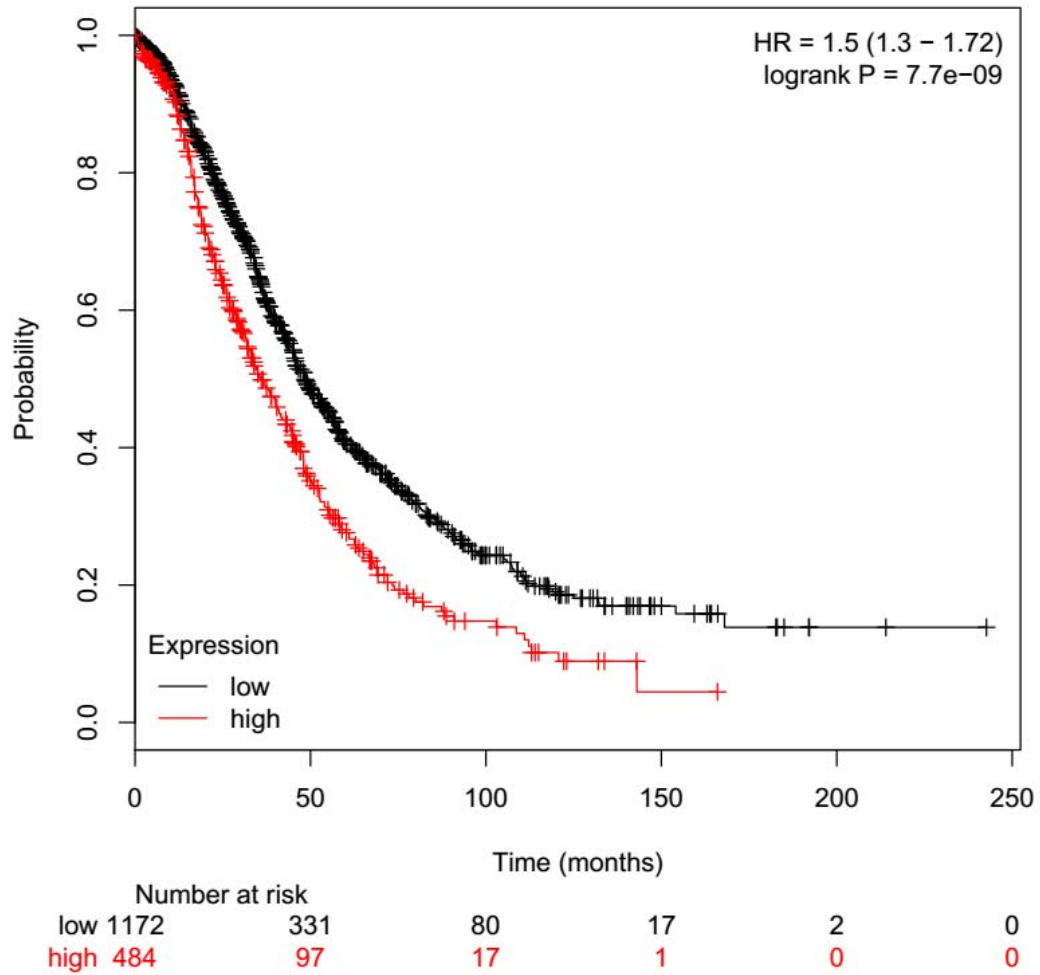

6.COL6A6

230867\_at

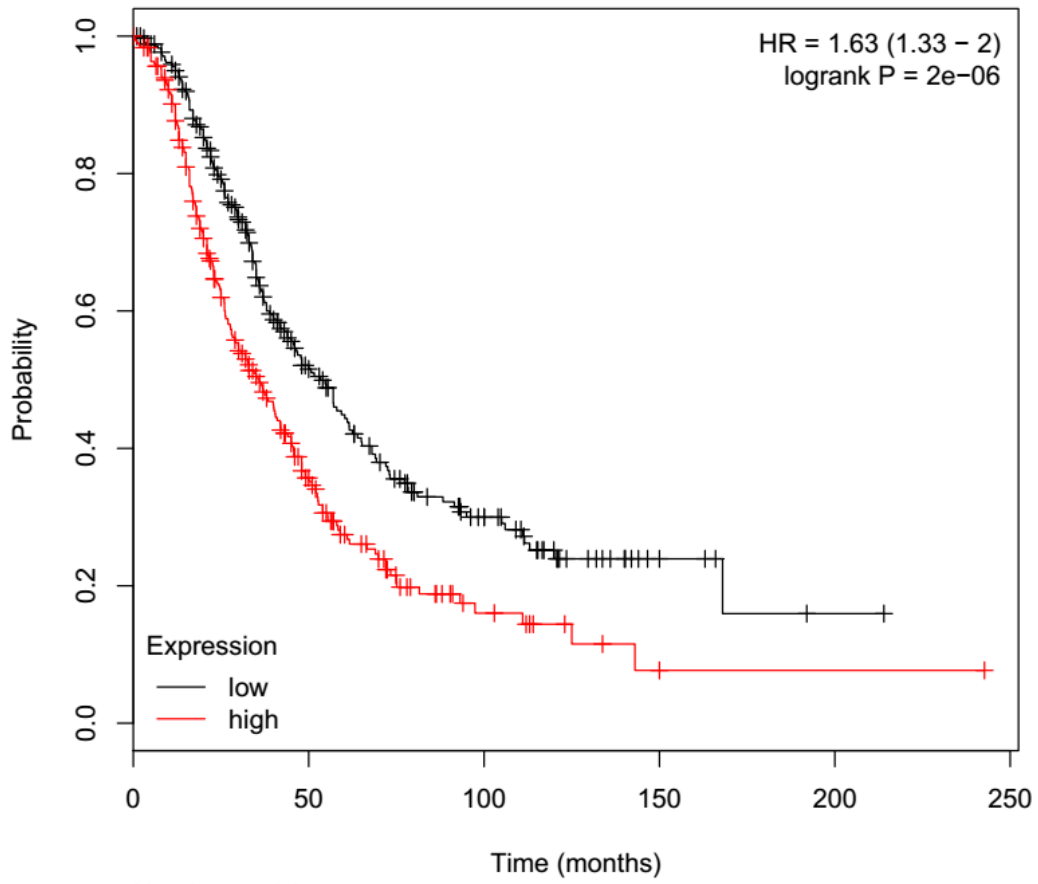

|      | 0   | 50 | 100 | 150 | 200 | 250 |
|------|-----|----|-----|-----|-----|-----|
| low  | 352 | 98 | 37  | 6   | 1   | 0   |
| high | 303 | 68 | 11  | 2   | 1   | 0   |

7. COL10A1

217428\_s\_at

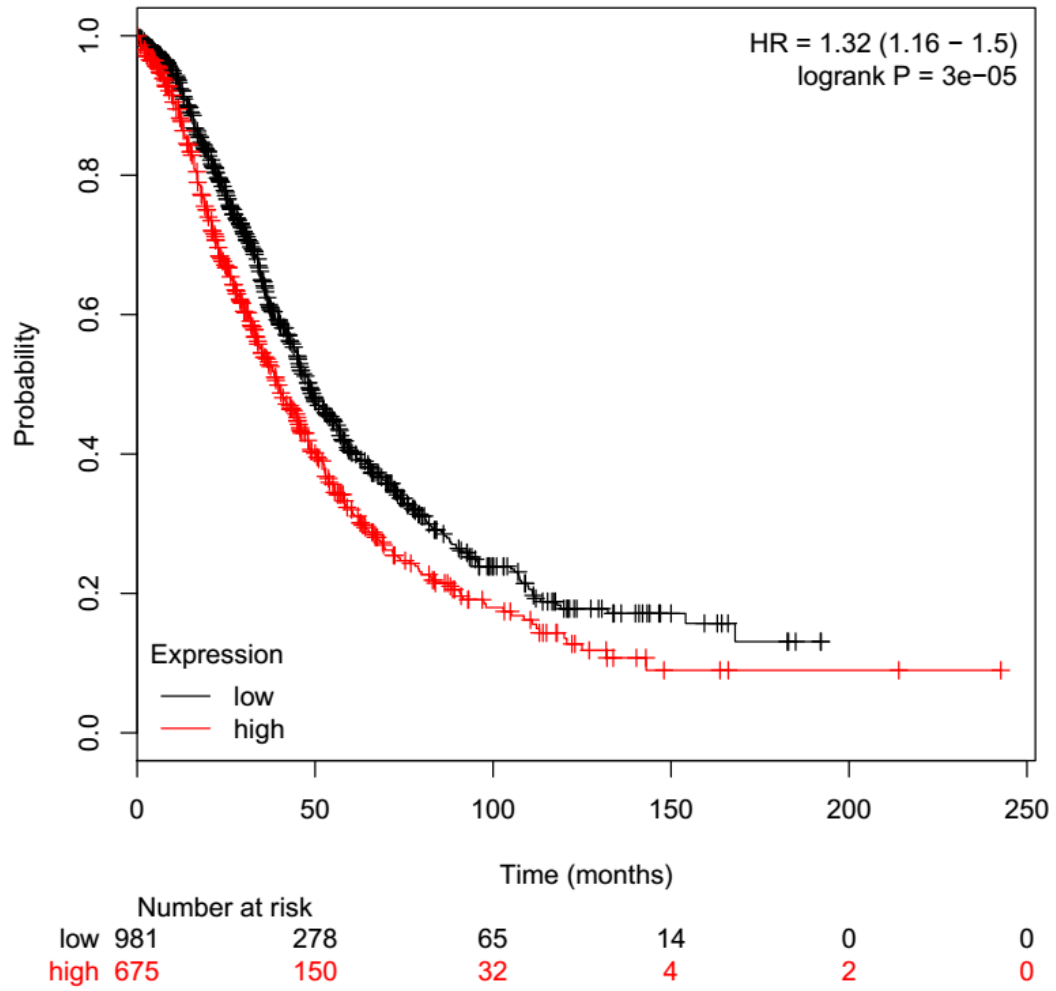

8. COL16A1

204345\_at

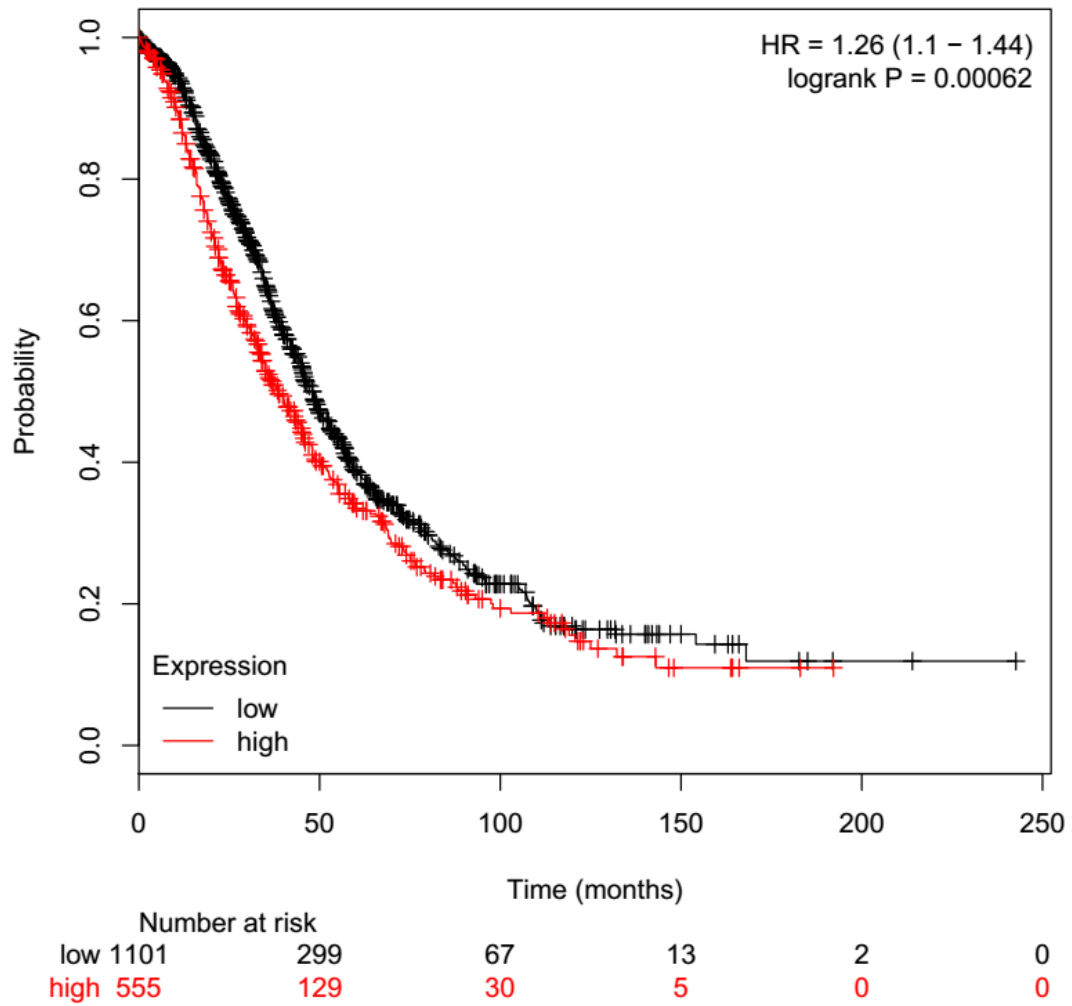



9. DHRS2

214079\_at

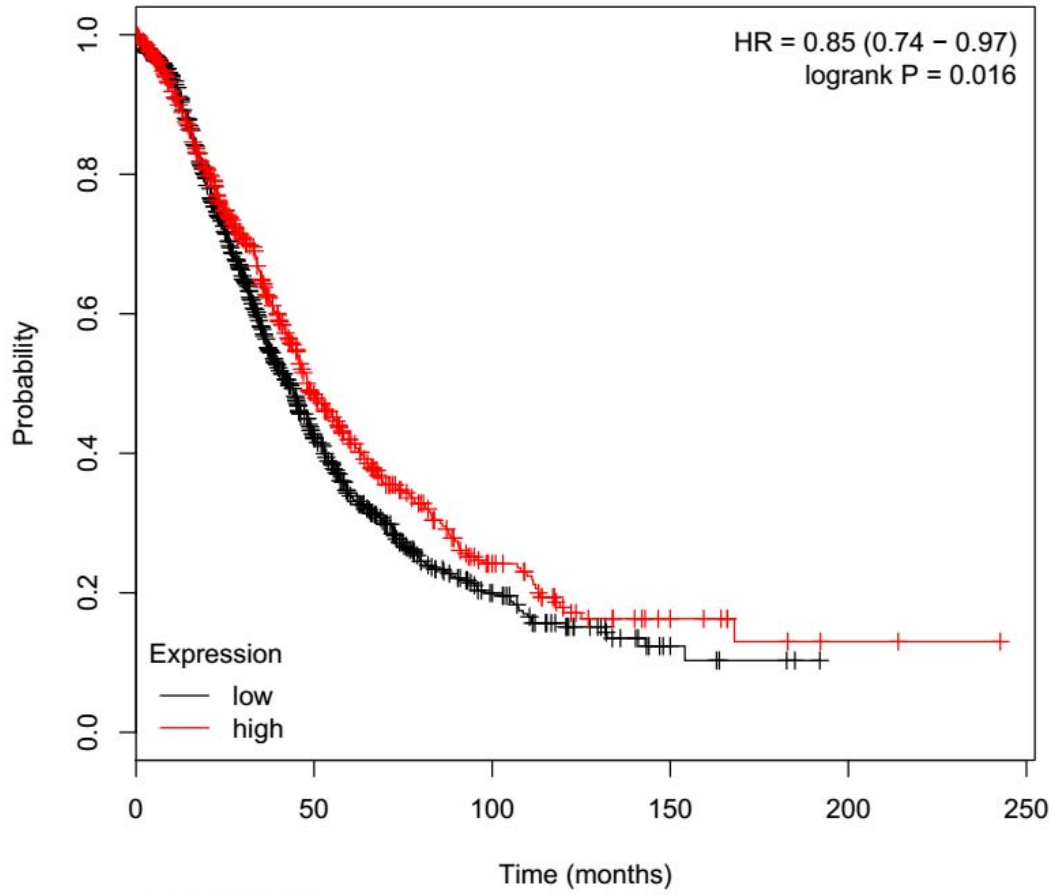

|      | 0    | 50  | 100 | 150 | 200 | 250 |
|------|------|-----|-----|-----|-----|-----|
| low  | 1041 | 246 | 52  | 7   | 0   | 0   |
| high | 615  | 182 | 45  | 11  | 2   | 0   |

10. DNAJB1

200666\_s\_at

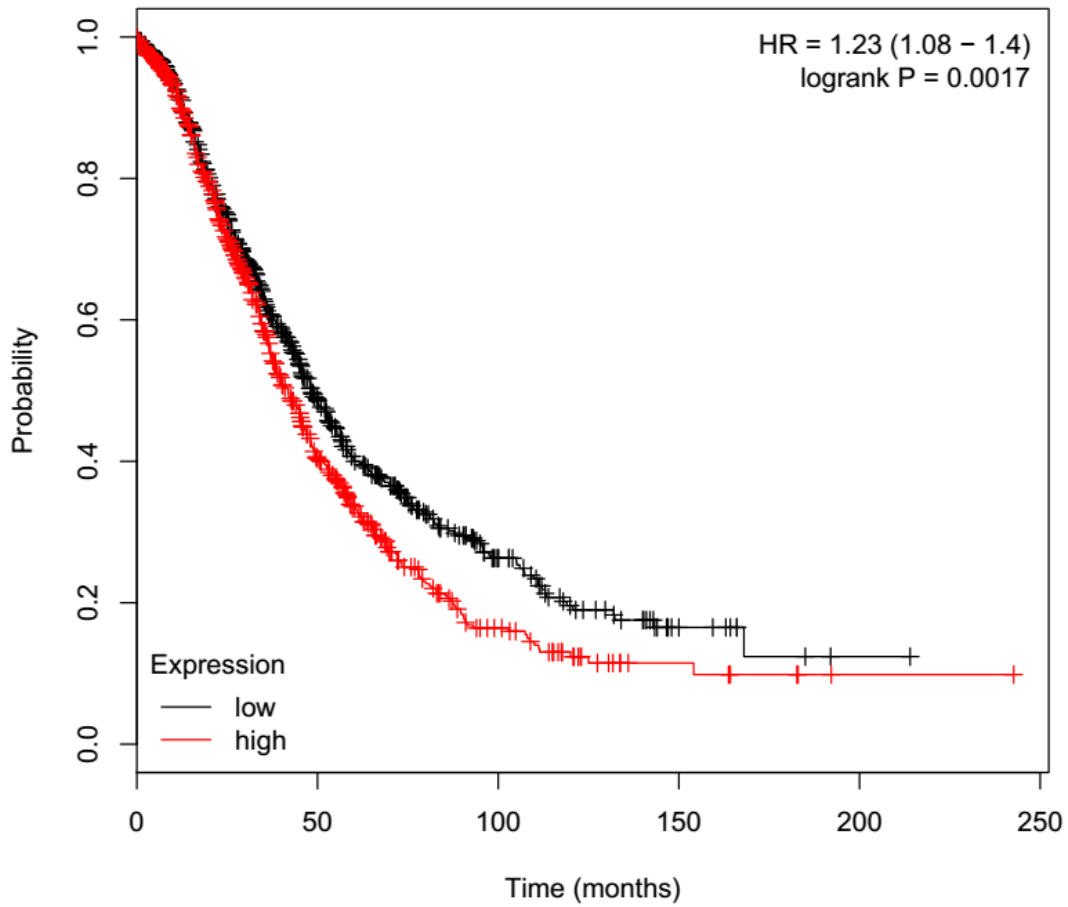

|      | Number at risk |     |     |     |     |     |
|------|----------------|-----|-----|-----|-----|-----|
|      | 0              | 50  | 100 | 150 | 200 | 250 |
| low  | 842            | 234 | 60  | 11  | 1   | 0   |
| high | 814            | 194 | 37  | 7   | 1   | 0   |

11. ERO1L

218498\_s\_at

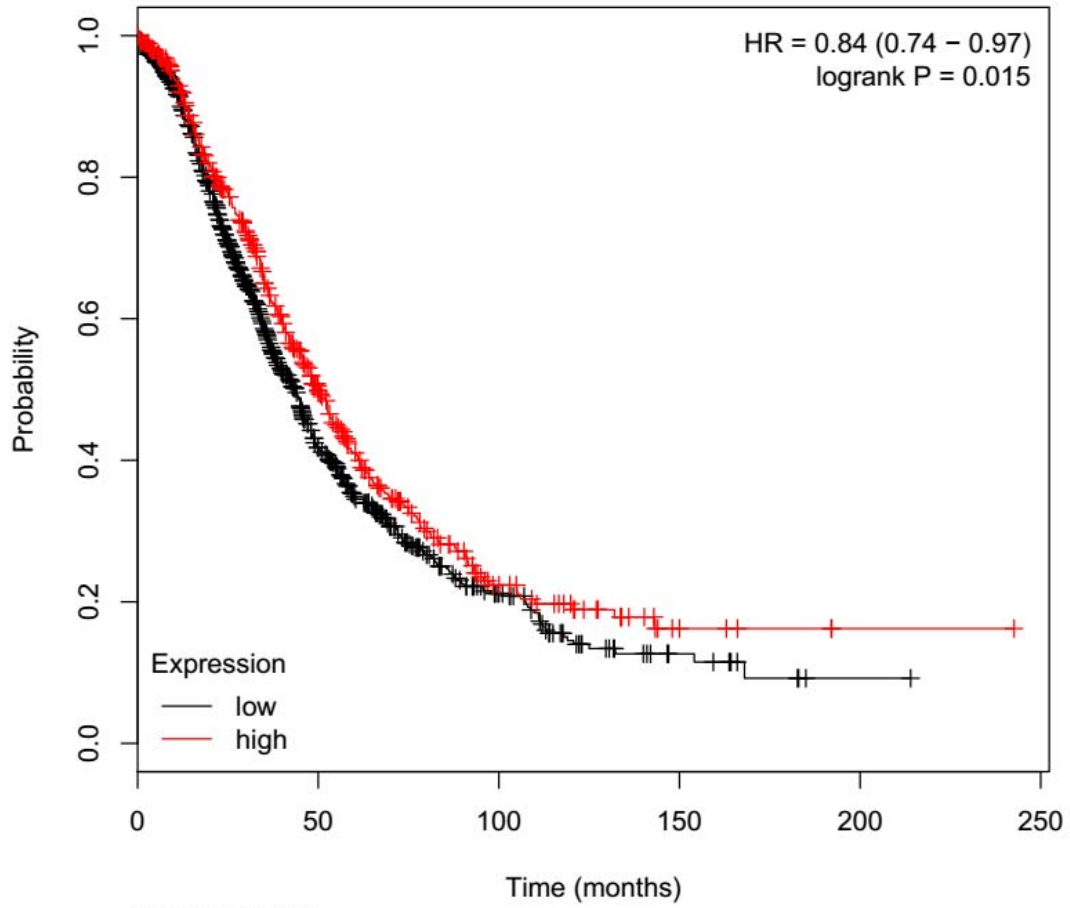

|      | Number at risk |     |     |     |     |     |
|------|----------------|-----|-----|-----|-----|-----|
|      | 0              | 50  | 100 | 150 | 200 | 250 |
| low  | 1107           | 258 | 60  | 11  | 1   | 0   |
| high | 549            | 170 | 37  | 7   | 1   | 0   |

12. GFM1

225153\_at

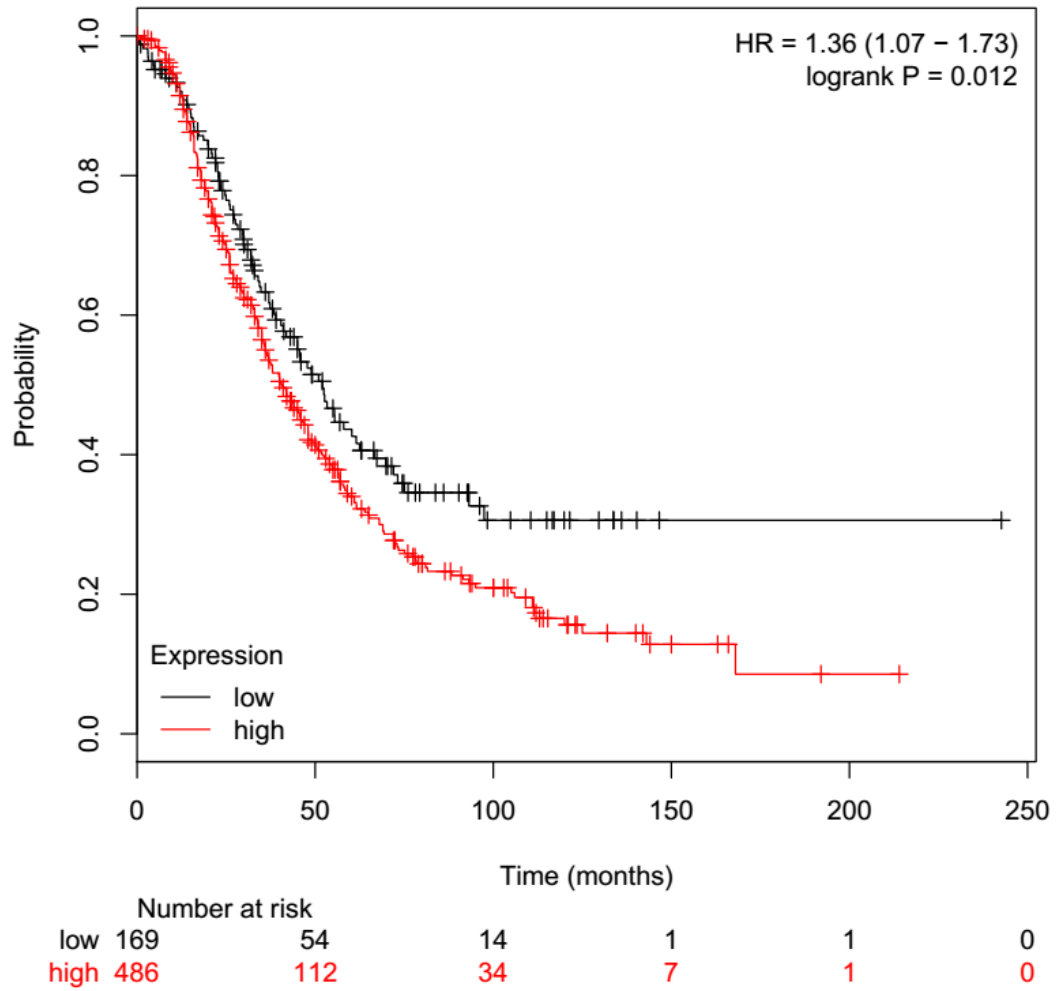

13. GGT5

205582\_s\_at

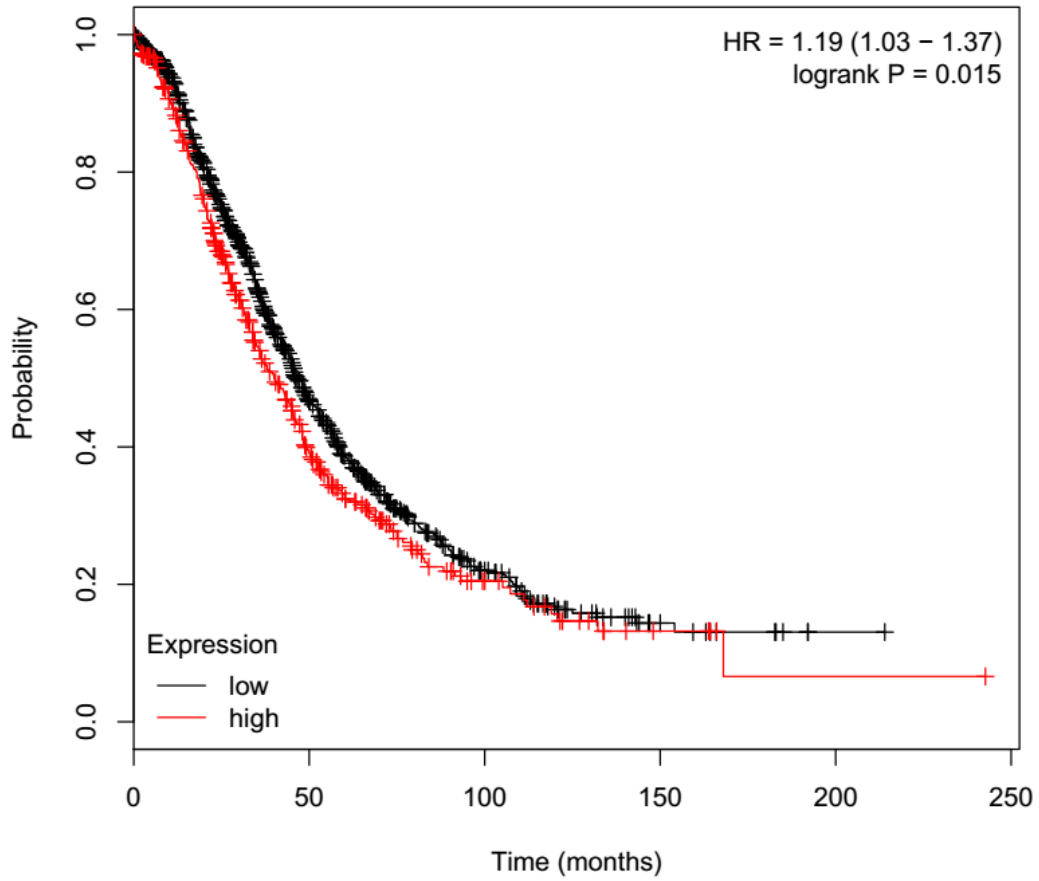

|      | Number at risk |     |     |     |     |
|------|----------------|-----|-----|-----|-----|
|      | 0              | 50  | 100 | 150 | 200 |
| low  | 1215           | 315 | 73  | 13  | 1   |
| high | 441            | 113 | 24  | 5   | 1   |

14. GLDC

204836\_at

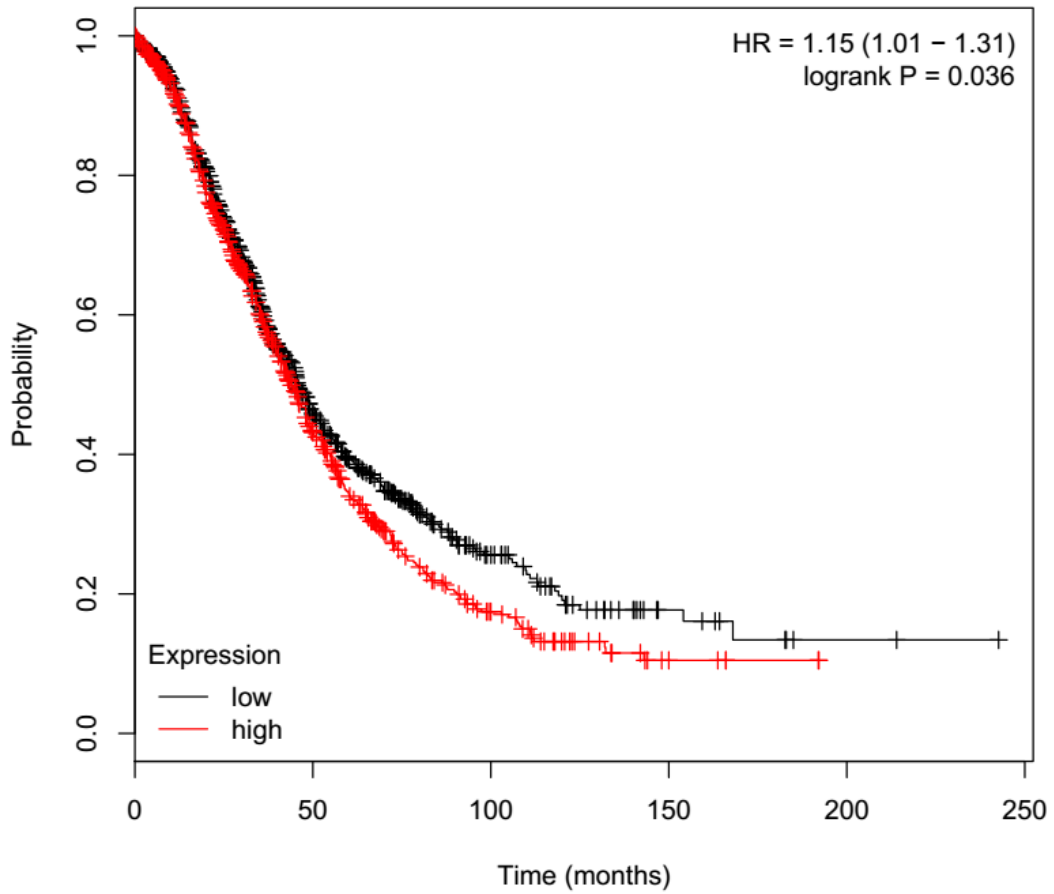

|      |     | 0   | 50 | 100 | 150 | 200 | 250 |
|------|-----|-----|----|-----|-----|-----|-----|
| low  | 918 | 231 | 52 | 11  | 2   | 0   |     |
| high | 738 | 197 | 45 | 7   | 0   | 0   |     |

15. GNAI1

227692\_at

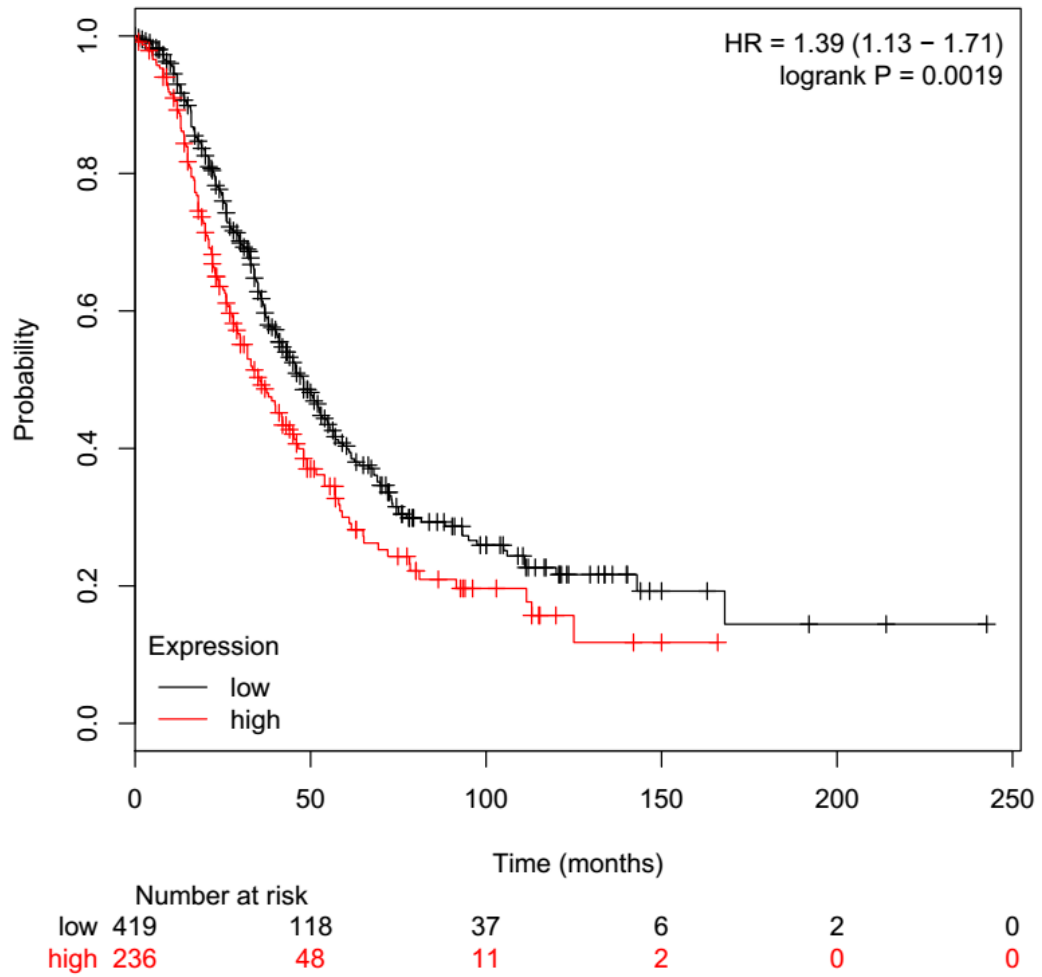

16. GNB4

225710\_at

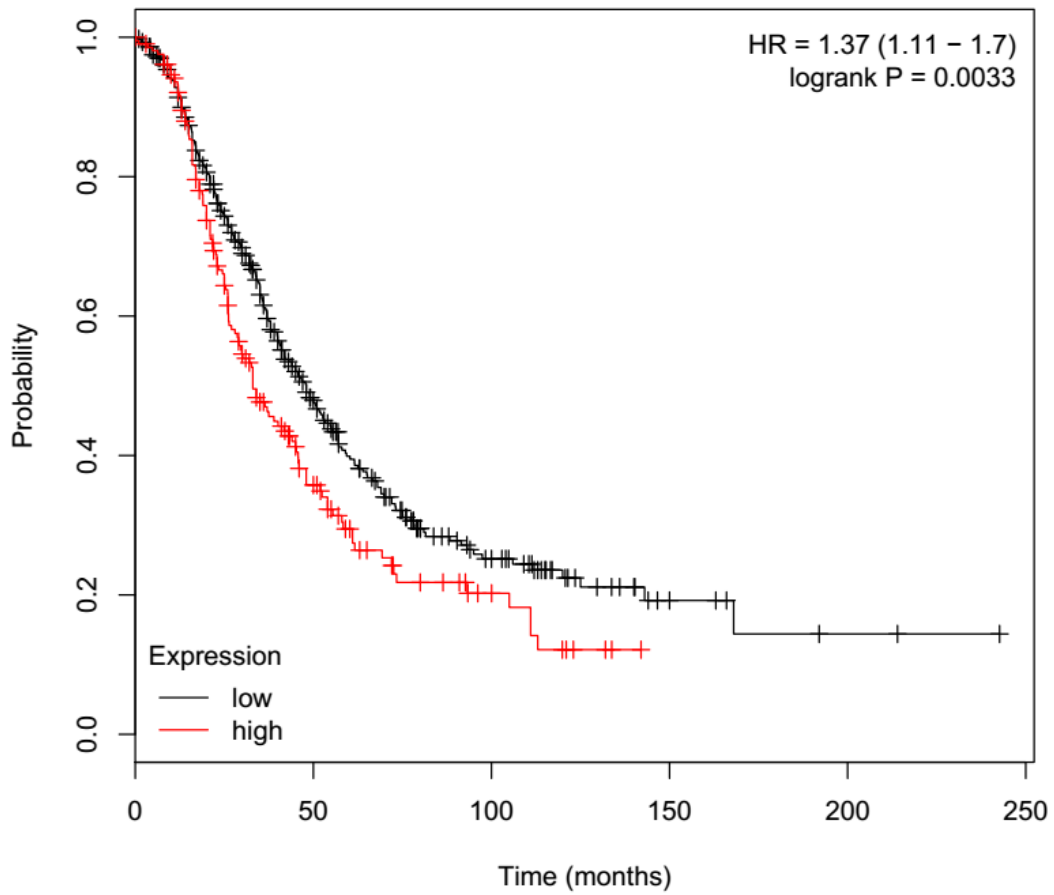

|      | Number at risk |     |     |     |     |     |
|------|----------------|-----|-----|-----|-----|-----|
|      | 0              | 50  | 100 | 150 | 200 | 250 |
| low  | 447            | 121 | 37  | 8   | 2   | 0   |
| high | 208            | 45  | 11  | 0   | 0   | 0   |



17. GSTM5

205752\_s\_at

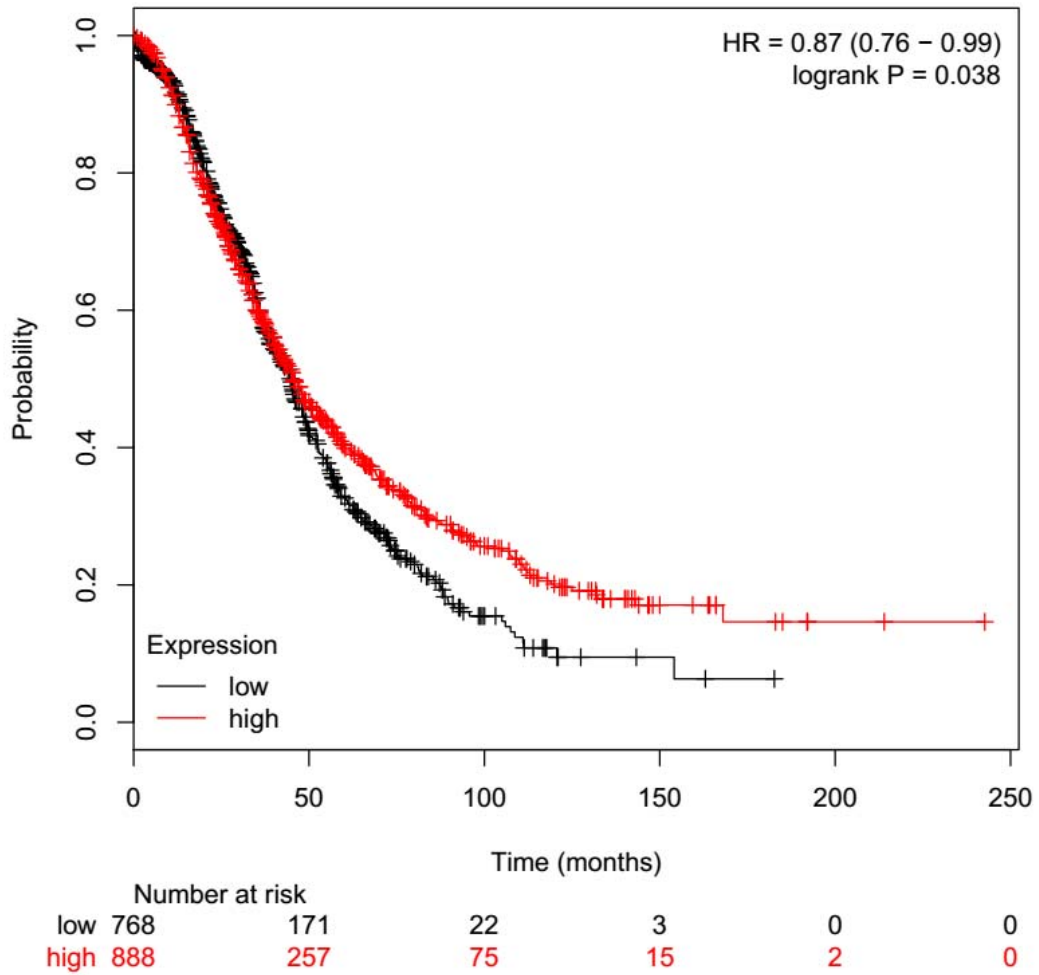

18. H1F0

208886\_at

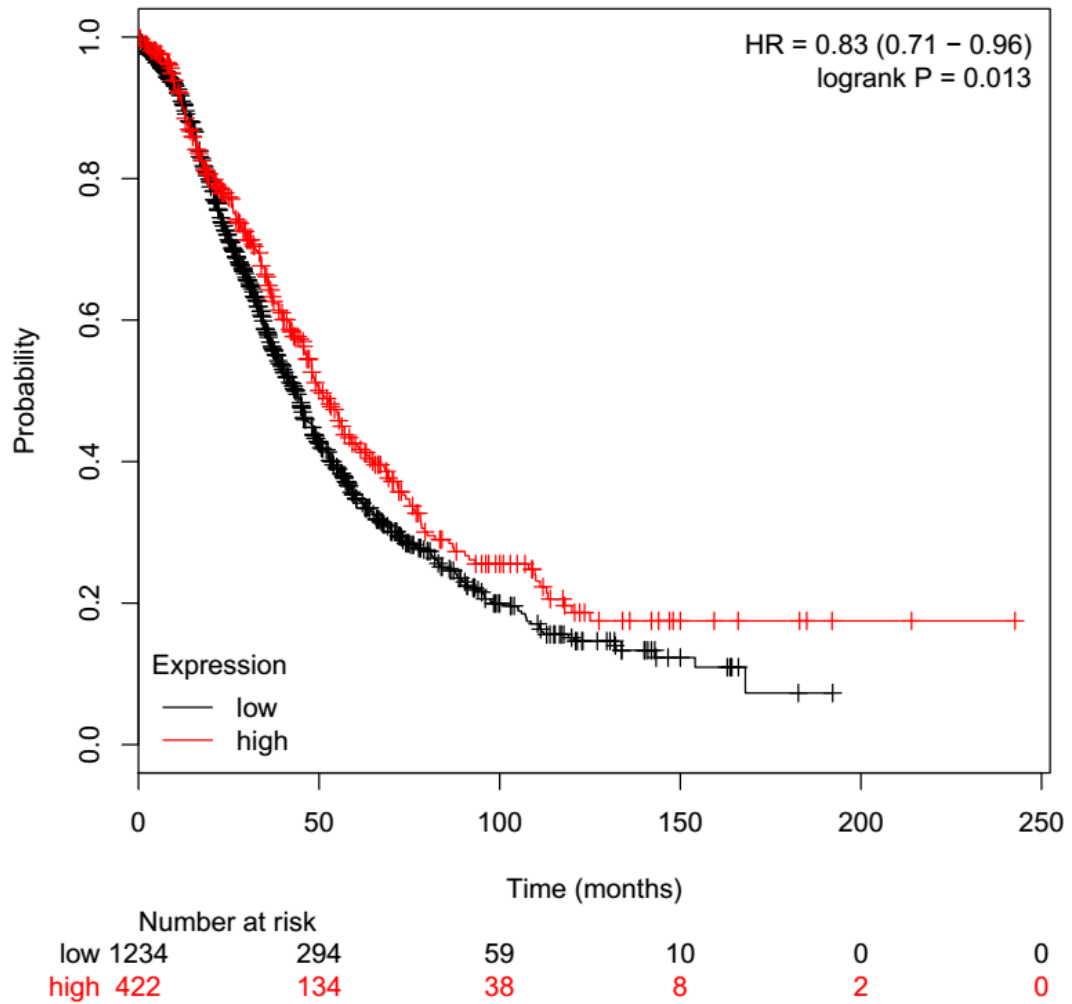

19. H1FX

204805\_s\_at

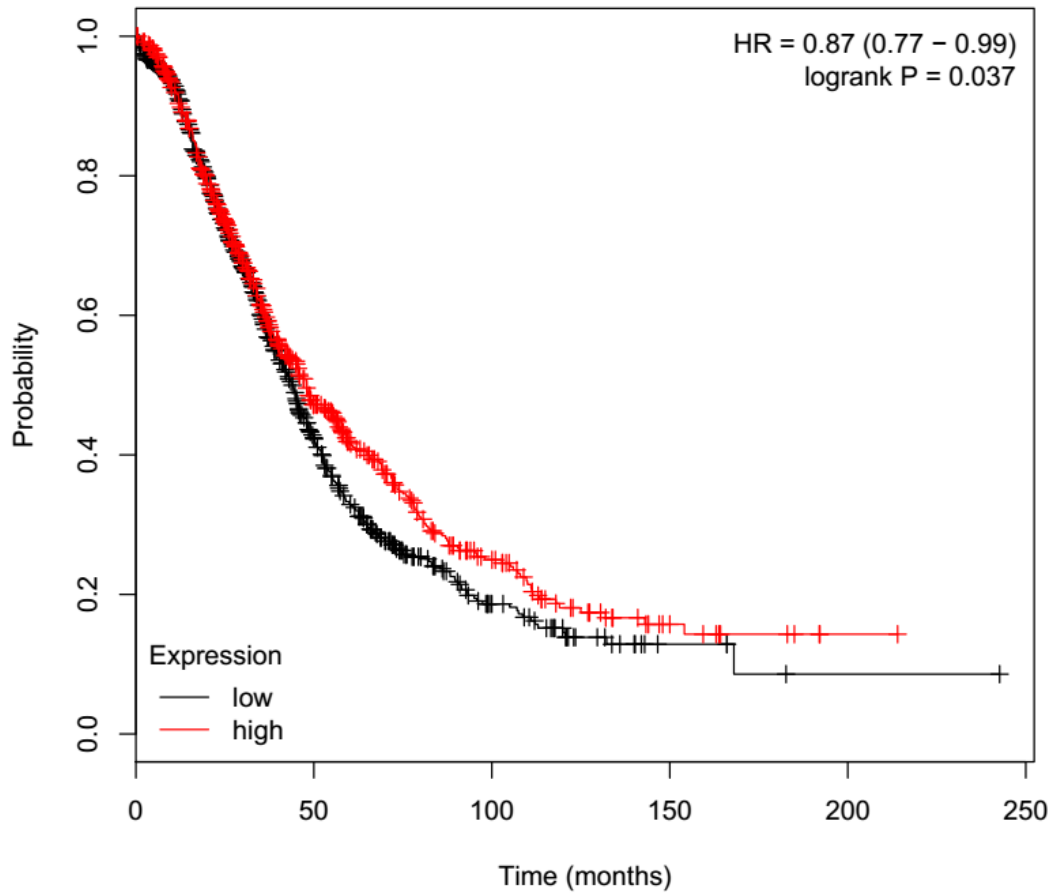

|      | Number at risk |     |     |     |     |     |
|------|----------------|-----|-----|-----|-----|-----|
|      | 0              | 50  | 100 | 150 | 200 | 250 |
| low  | 914            | 219 | 41  | 5   | 1   | 0   |
| high | 742            | 209 | 56  | 13  | 1   | 0   |

20. H2AFY

207168\_s\_at

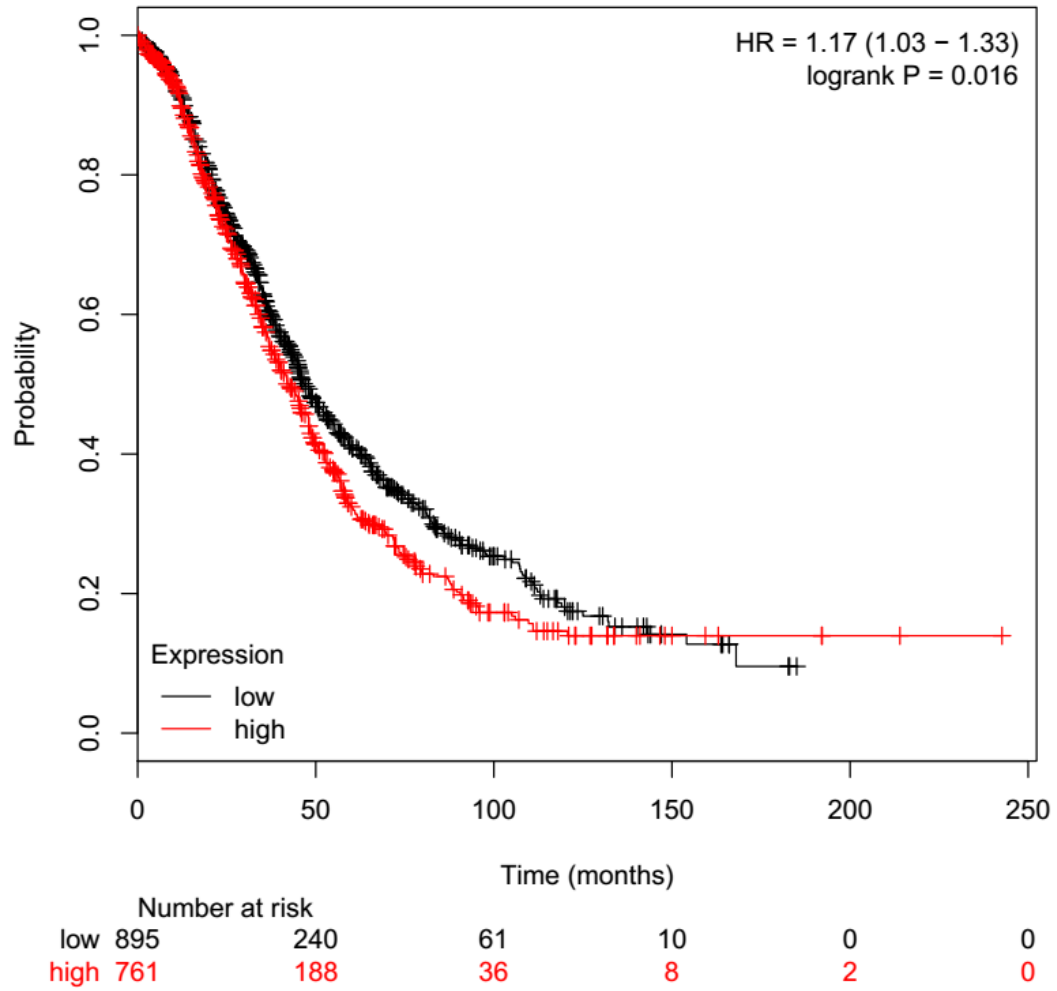

21. H2AFZ

213911\_s\_at

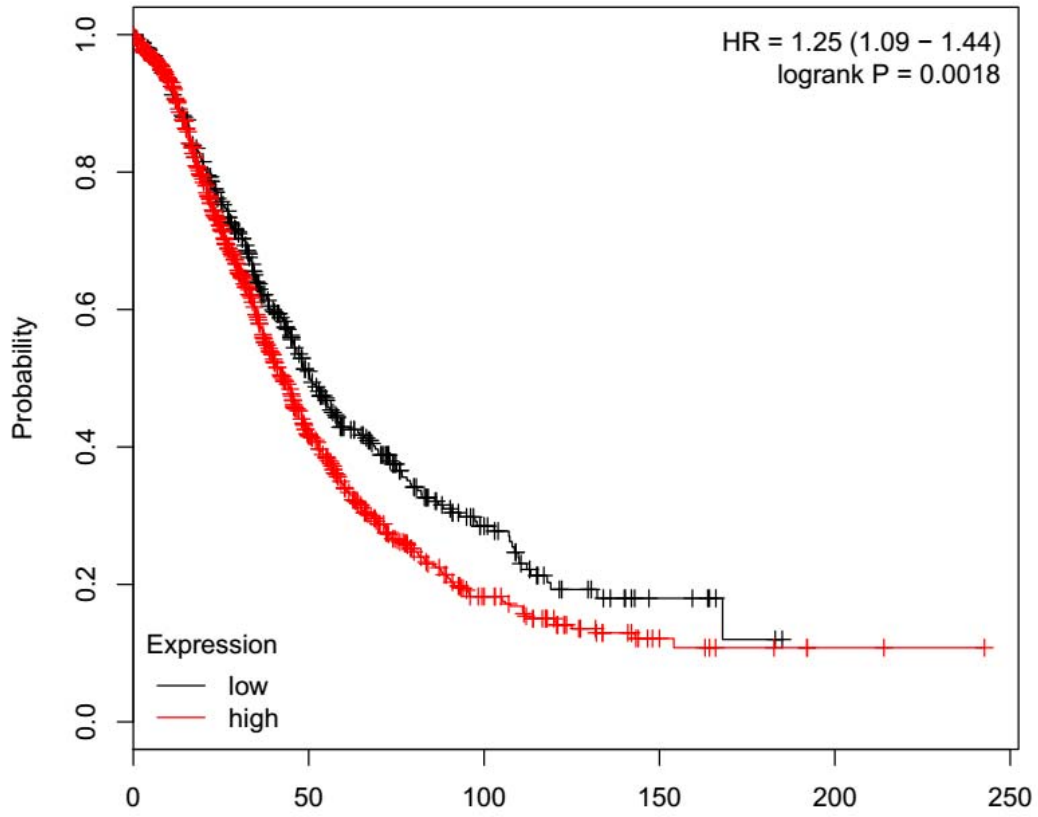

|      | Number at risk |     |     |     |     |     |
|------|----------------|-----|-----|-----|-----|-----|
|      | 0              | 50  | 100 | 150 | 200 | 250 |
| low  | 497            | 161 | 41  | 7   | 0   | 0   |
| high | 1159           | 267 | 56  | 11  | 2   | 0   |

22. HEBP1

218450\_at

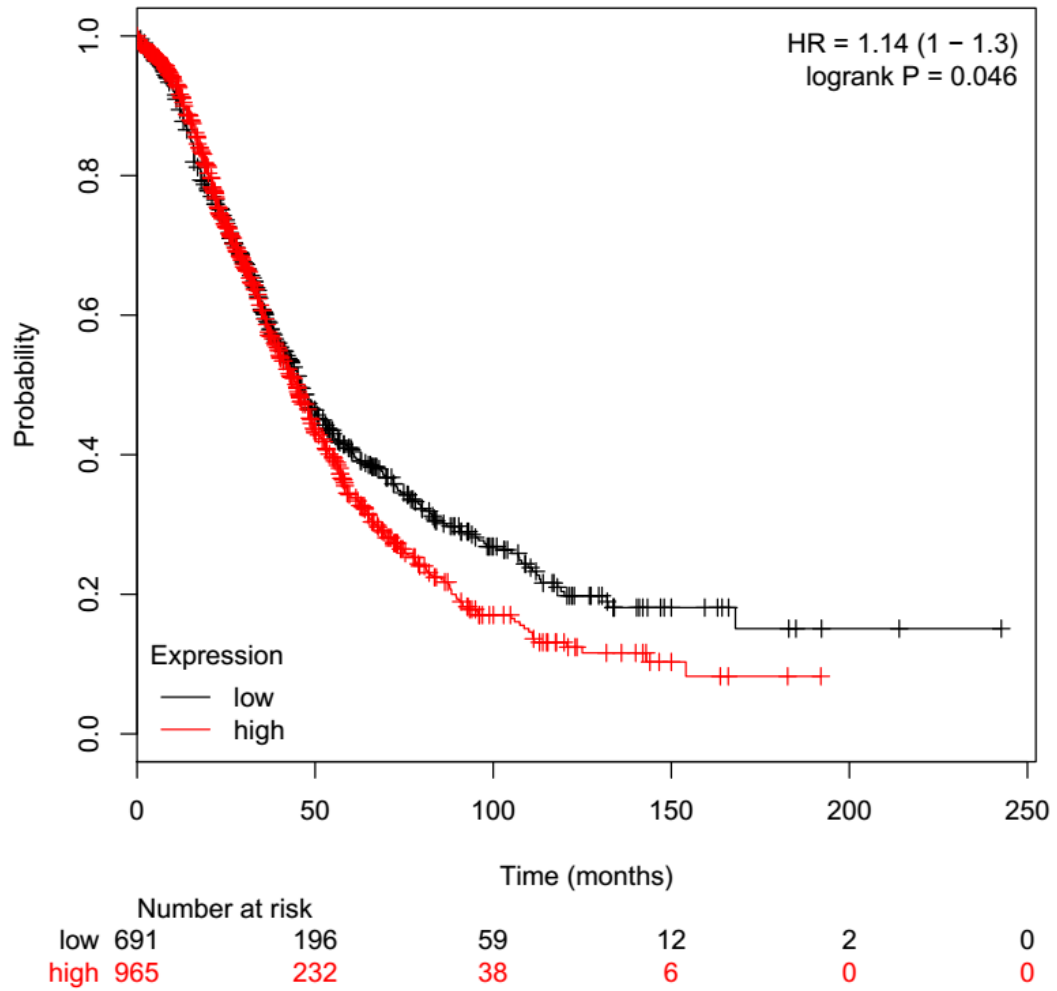

23. HIBCH

213374\_x\_at

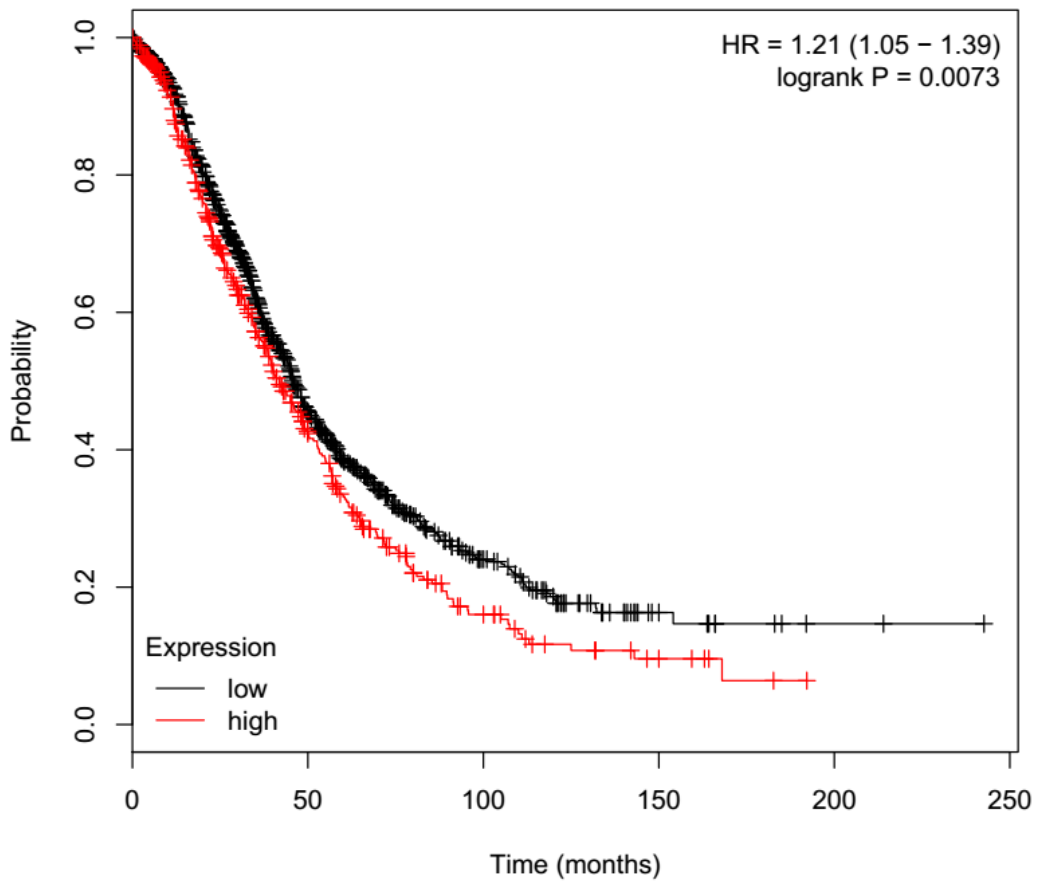

|      | 0    | 50  | 100 | 150 | 200 | 250 |
|------|------|-----|-----|-----|-----|-----|
| low  | 1208 | 310 | 70  | 11  | 2   | 0   |
| high | 448  | 118 | 27  | 7   | 0   | 0   |

24. HIST1H1C

209398\_at

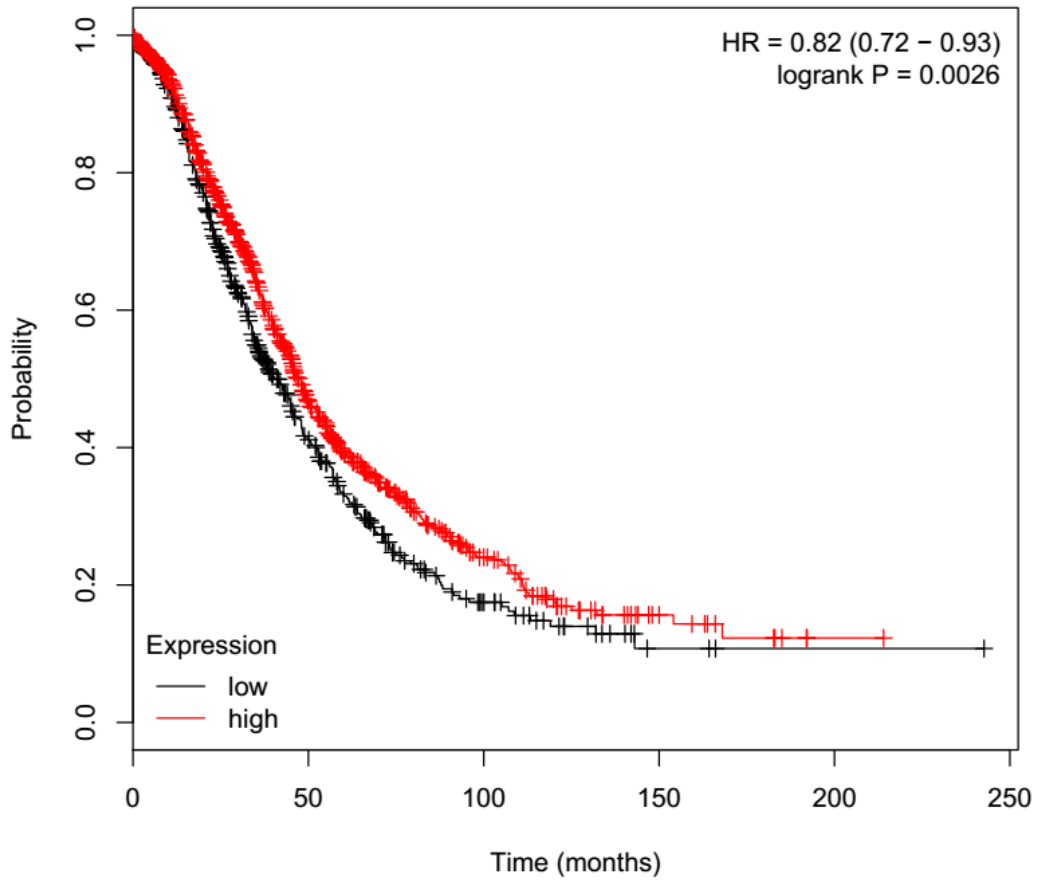

|      |      | Number at risk |     |     |     |     |
|------|------|----------------|-----|-----|-----|-----|
|      | 0    | 50             | 100 | 150 | 200 | 250 |
| low  | 606  | 149            | 31  | 4   | 1   | 0   |
| high | 1050 | 279            | 66  | 14  | 1   | 0   |



25. HIST1H2BJ

214502\_at

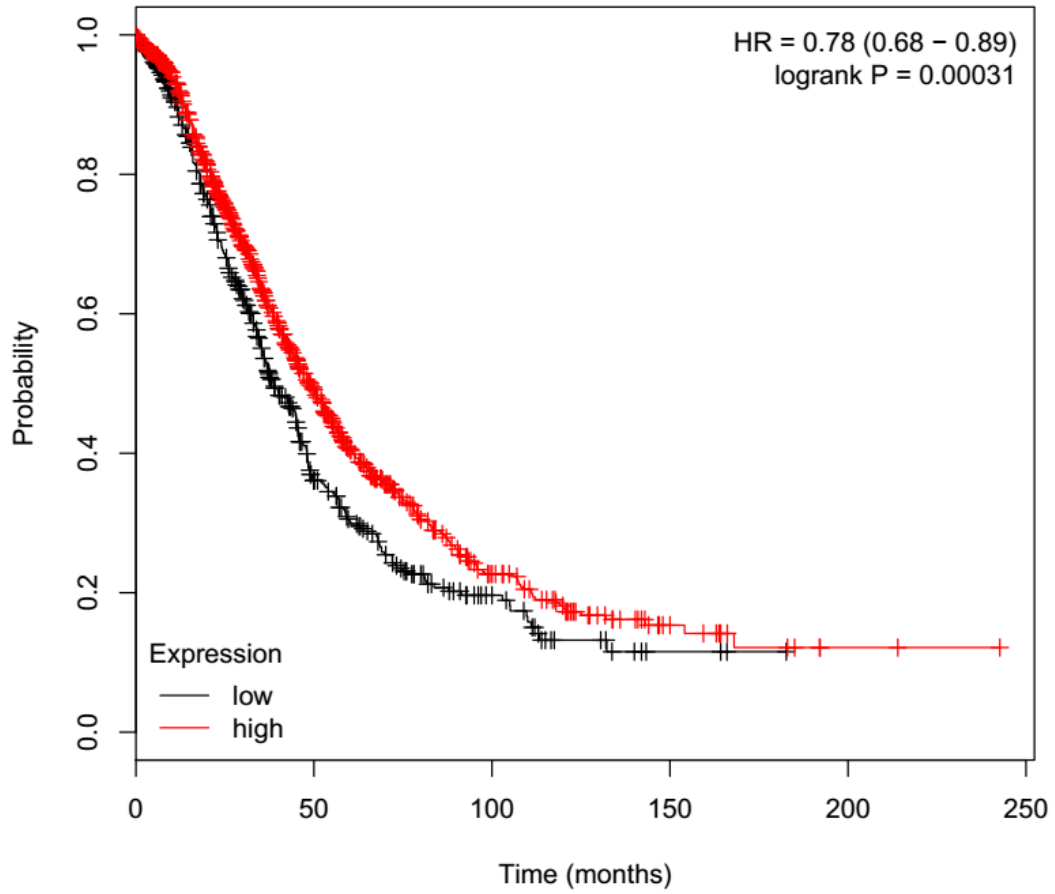

|      | 0    | 50  | 100 | 150 | 200 | 250 |
|------|------|-----|-----|-----|-----|-----|
| low  | 576  | 119 | 28  | 3   | 0   | 0   |
| high | 1080 | 309 | 69  | 15  | 2   | 0   |

26. HIST1H2BK

209806\_at

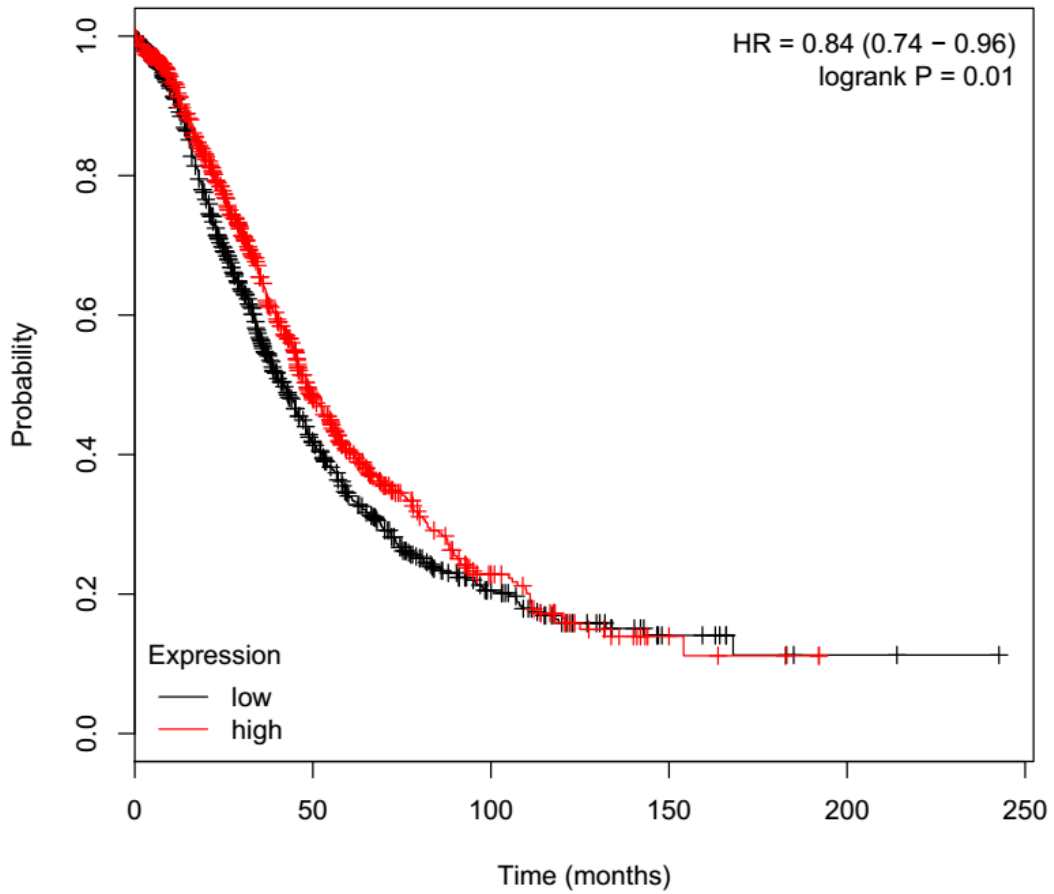

|      | Number at risk |     |     |     |     |     |
|------|----------------|-----|-----|-----|-----|-----|
|      | 0              | 50  | 100 | 150 | 200 | 250 |
| low  | 876            | 219 | 52  | 11  | 2   | 0   |
| high | 780            | 209 | 45  | 7   | 0   | 0   |

27. HIST1H4B

214516\_at

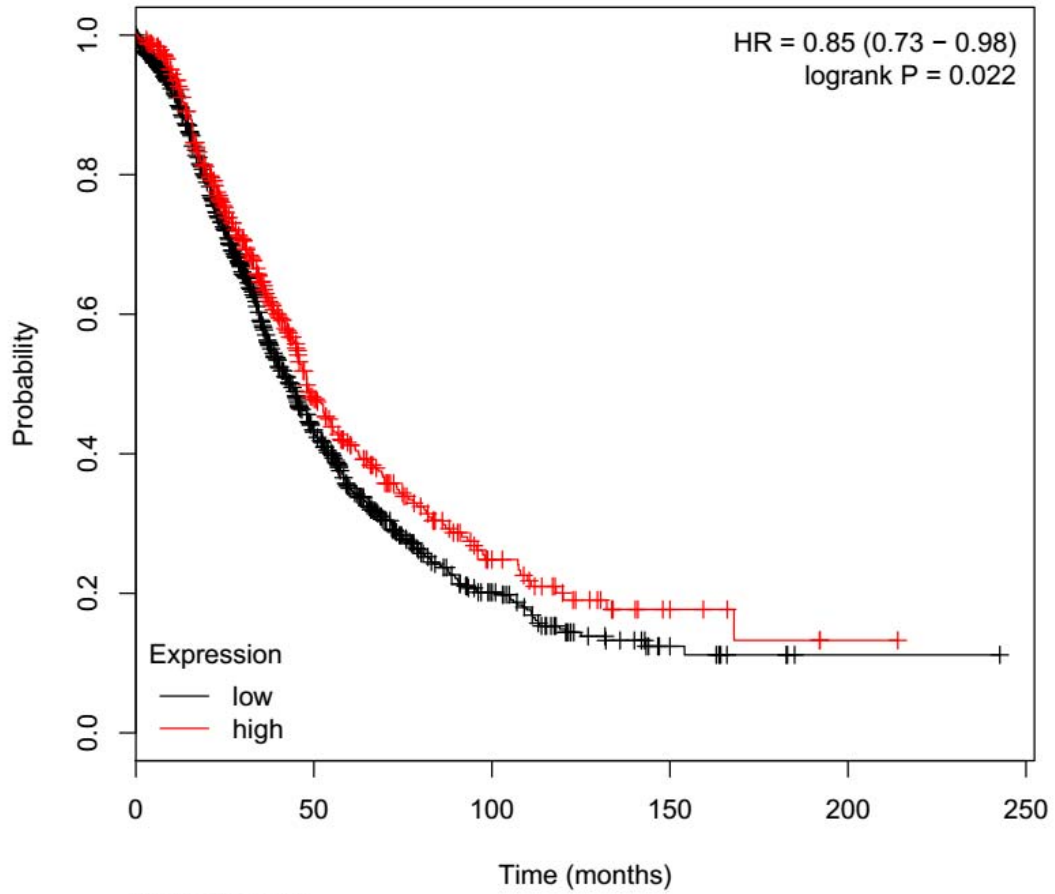

|      | Number at risk |     |     |     |     |     |
|------|----------------|-----|-----|-----|-----|-----|
|      | 0              | 50  | 100 | 150 | 200 | 250 |
| low  | 1177           | 289 | 62  | 11  | 1   | 0   |
| high | 479            | 139 | 35  | 7   | 1   | 0   |

28. HIST1H4D

208076\_at

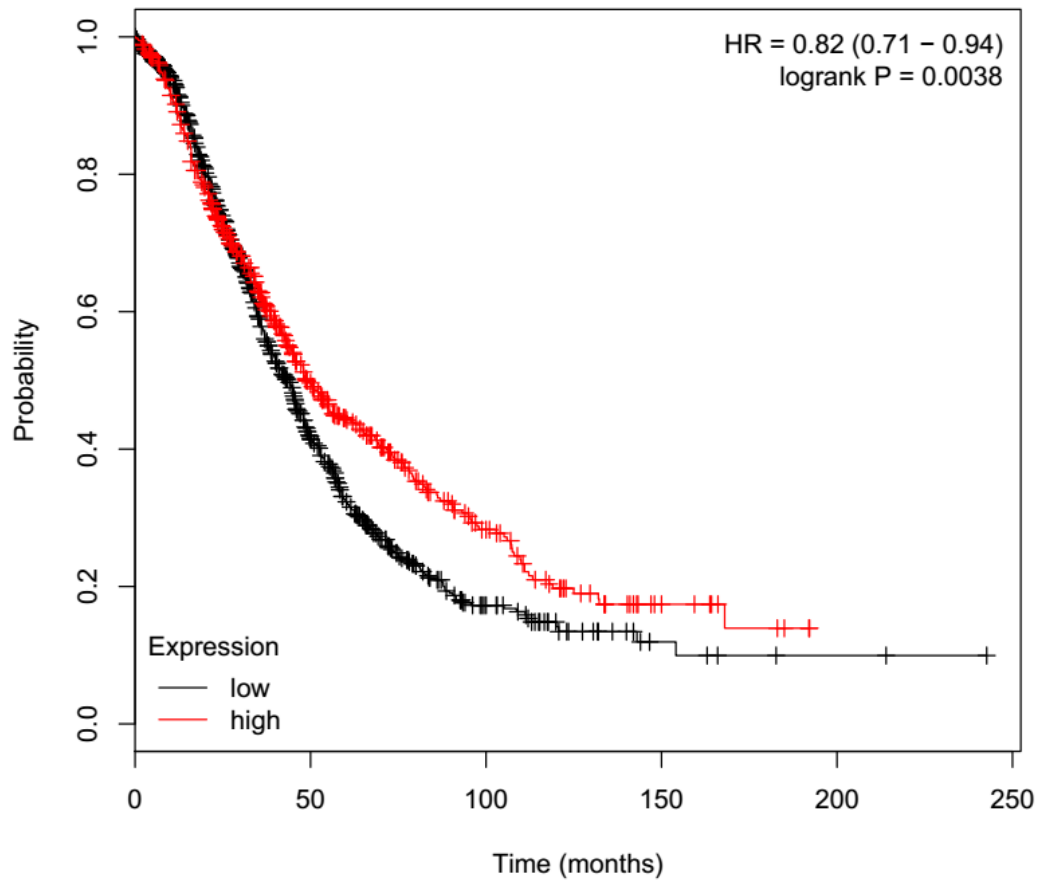

|      | Number at risk |     |     |     |     |     |
|------|----------------|-----|-----|-----|-----|-----|
|      | 0              | 50  | 100 | 150 | 200 | 250 |
| low  | 1095           | 244 | 41  | 6   | 2   | 0   |
| high | 561            | 184 | 56  | 12  | 0   | 0   |

29. HIST1H4F

208026\_at

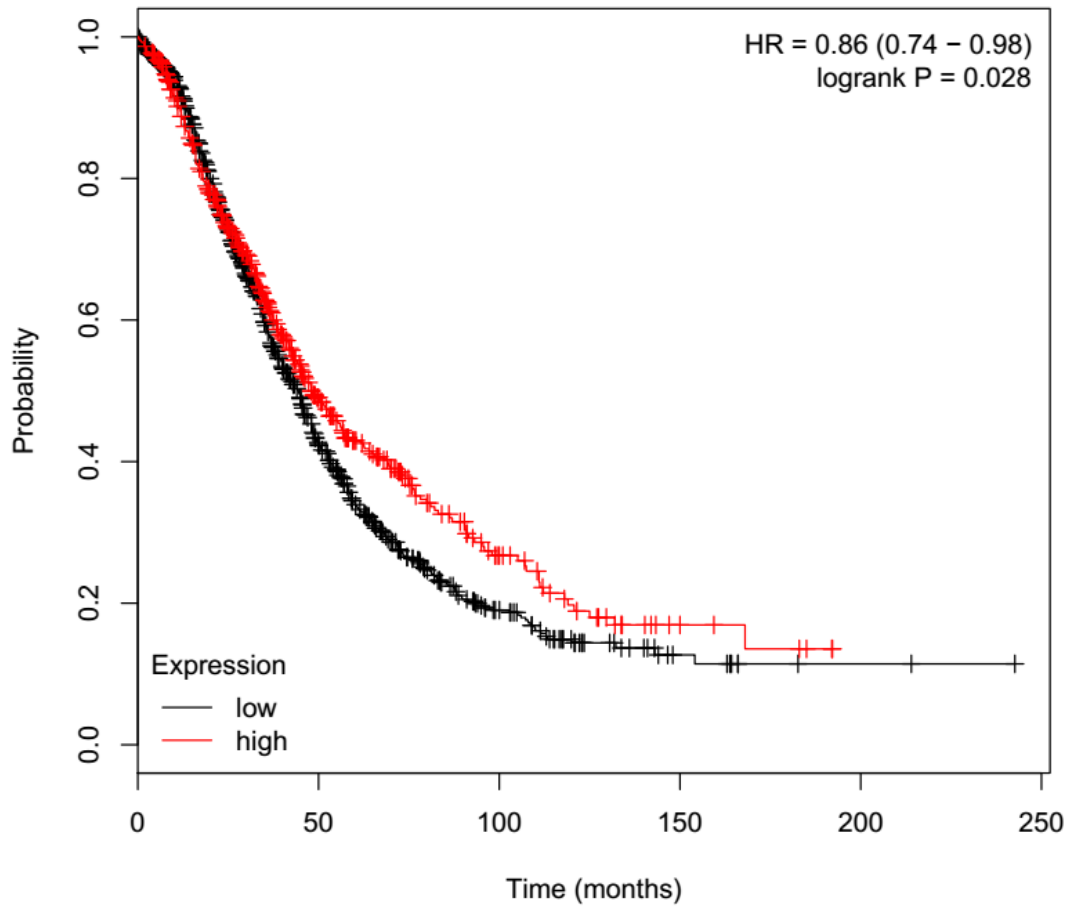

|      | Number at risk |     |     |     |     |     |
|------|----------------|-----|-----|-----|-----|-----|
|      | 0              | 50  | 100 | 150 | 200 | 250 |
| low  | 1131           | 273 | 57  | 10  | 2   | 0   |
| high | 525            | 155 | 40  | 8   | 0   | 0   |

30. HIST1H4H

208180\_s\_at

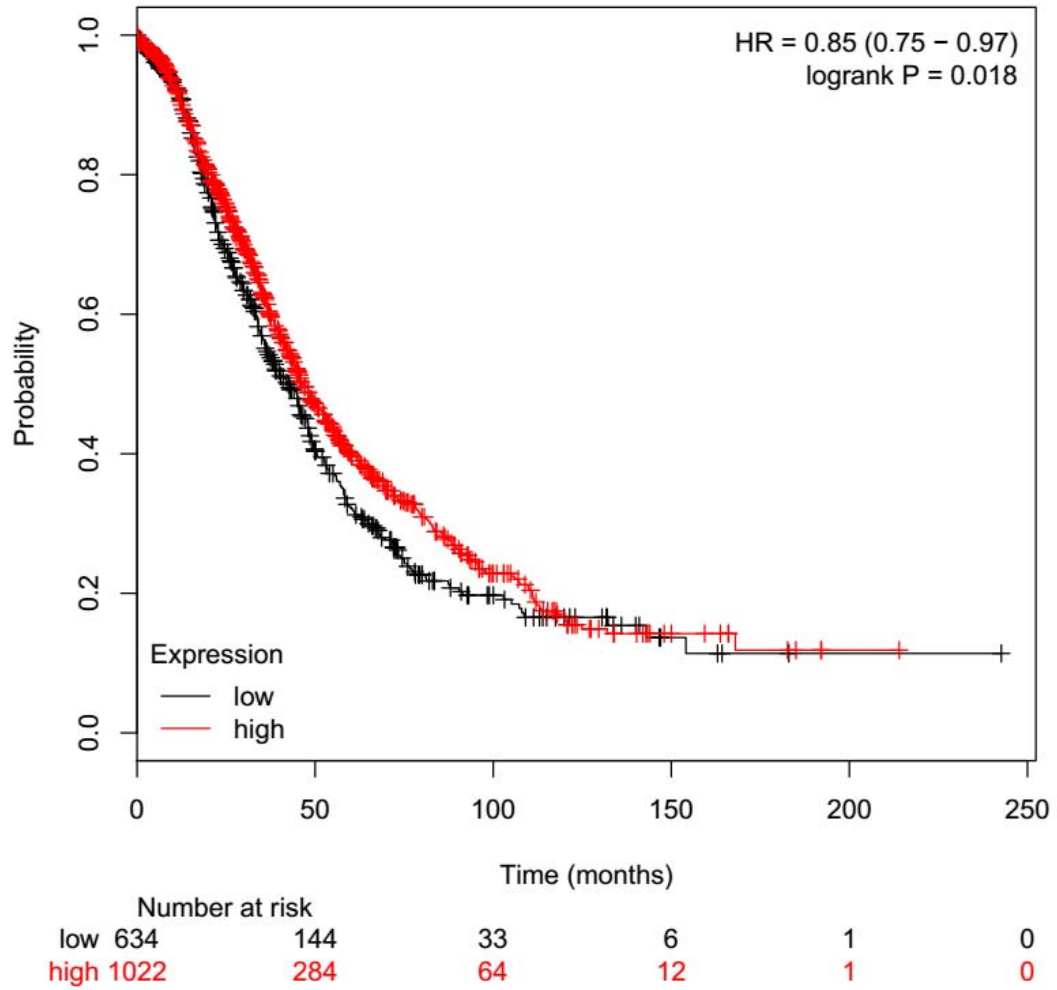

31. HIST1H4J

214463\_x\_at

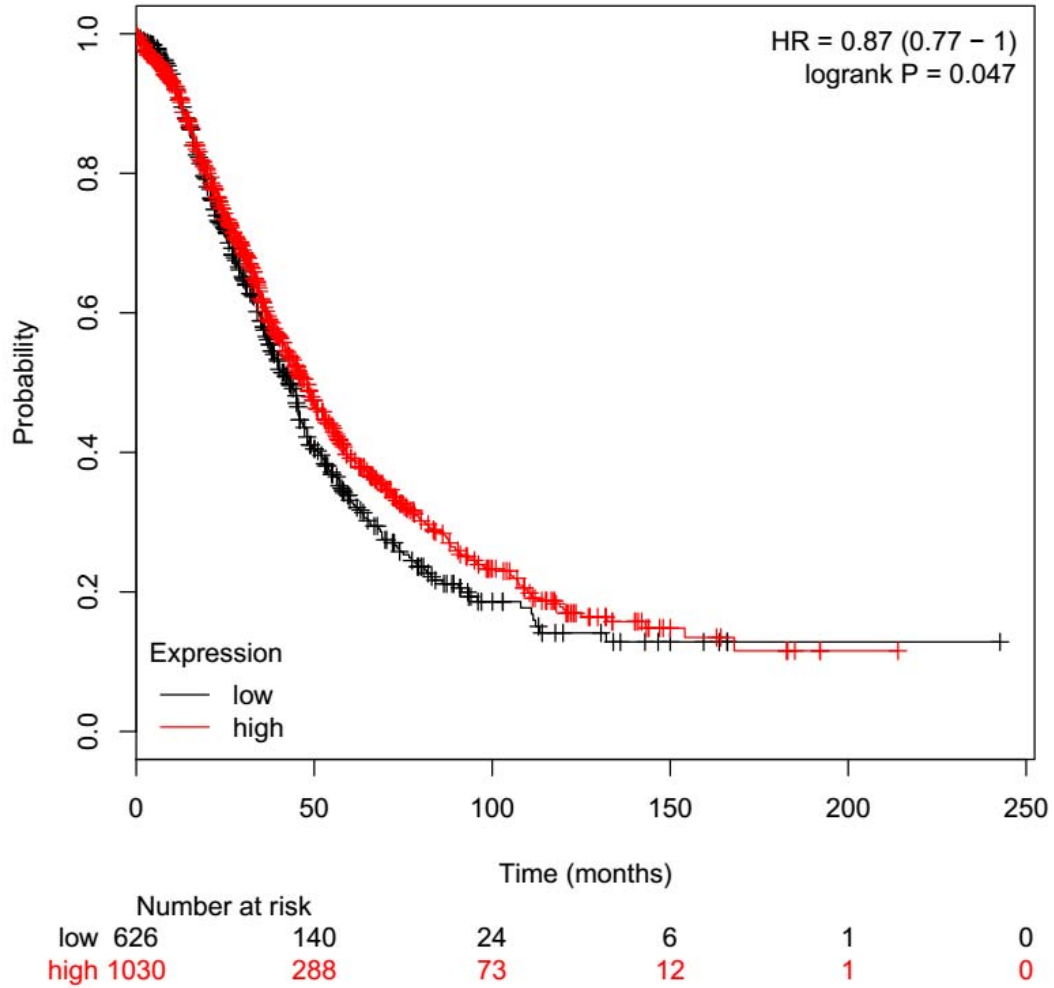

32. HSD11B1

205404\_at

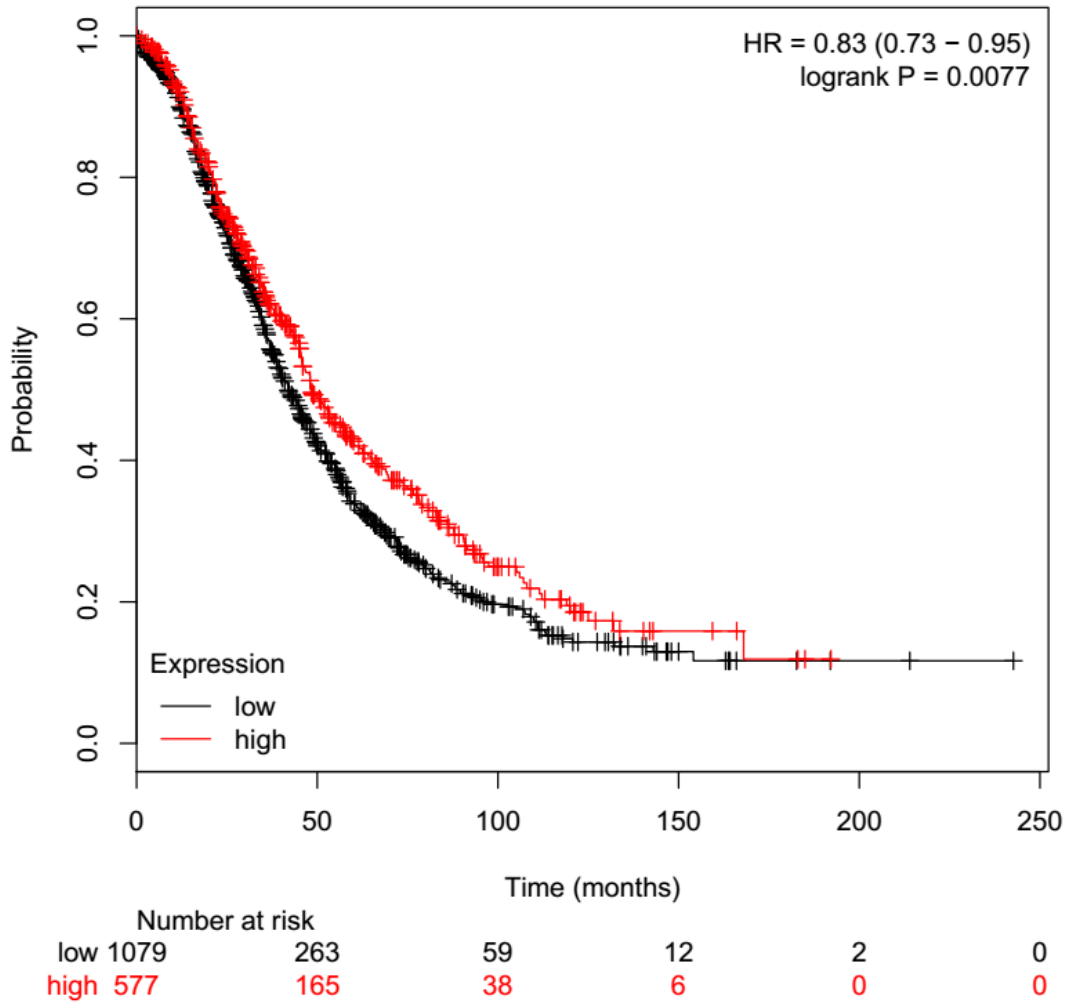



33. HYOU1

200825\_s\_at

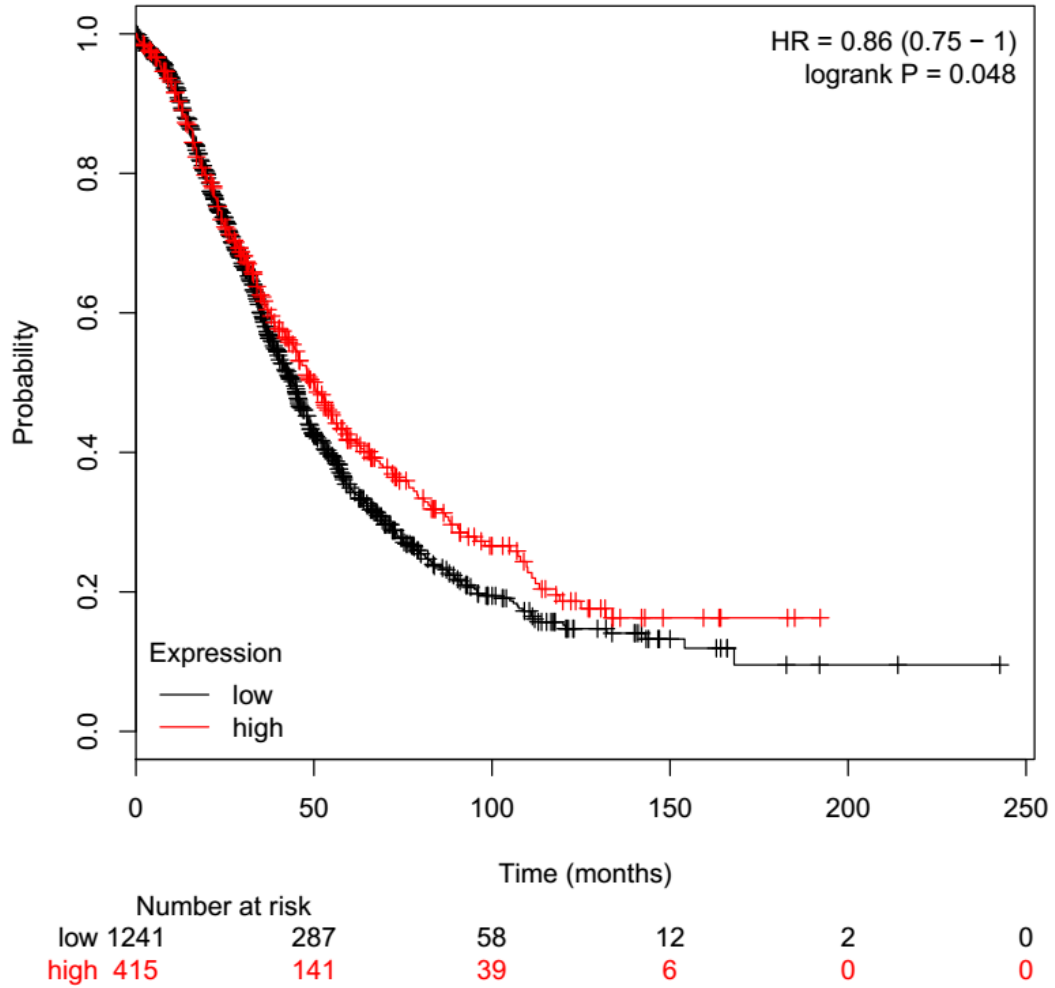

34. MRPL41

227186\_s\_at

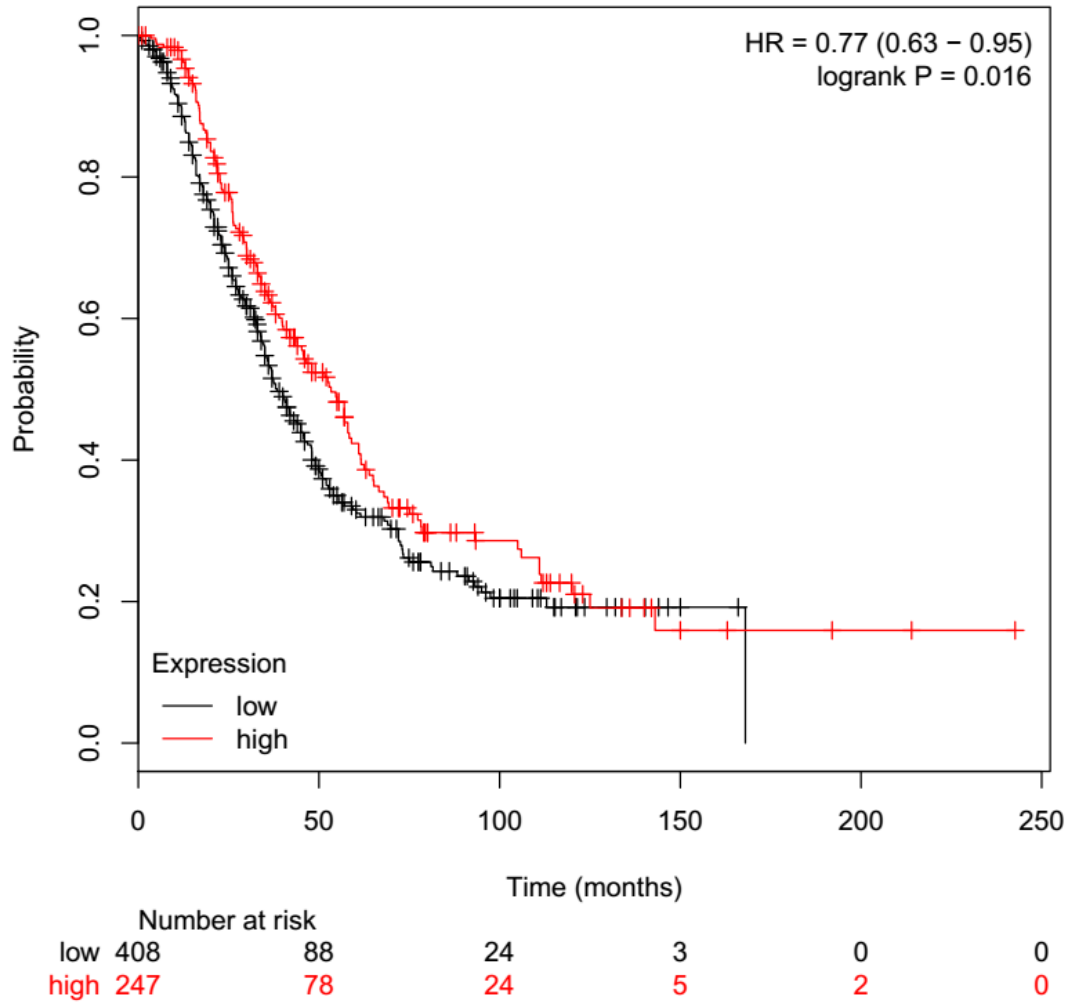

35. MRPL46

219244\_s\_at

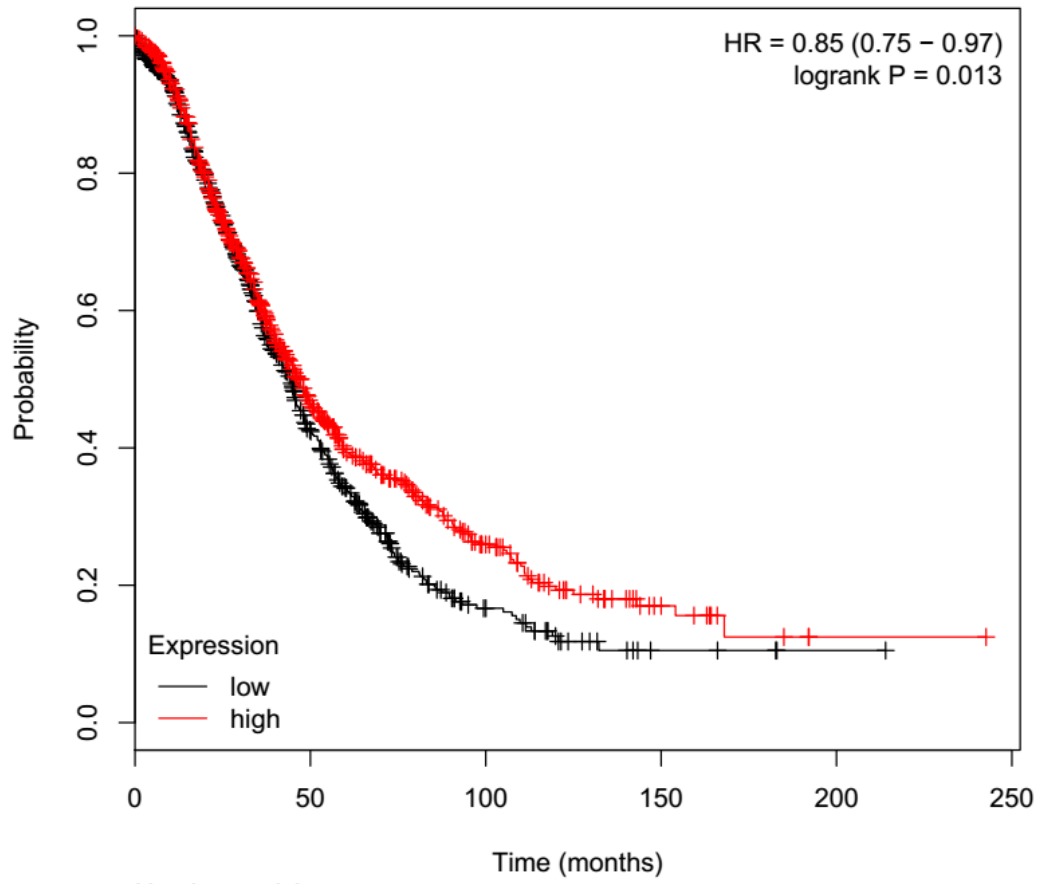

|      | 0   | 50  | 100 | 150 | 200 | 250 |
|------|-----|-----|-----|-----|-----|-----|
| low  | 753 | 192 | 32  | 4   | 1   | 0   |
| high | 903 | 236 | 65  | 14  | 1   | 0   |

36. MRPL53

225523\_at

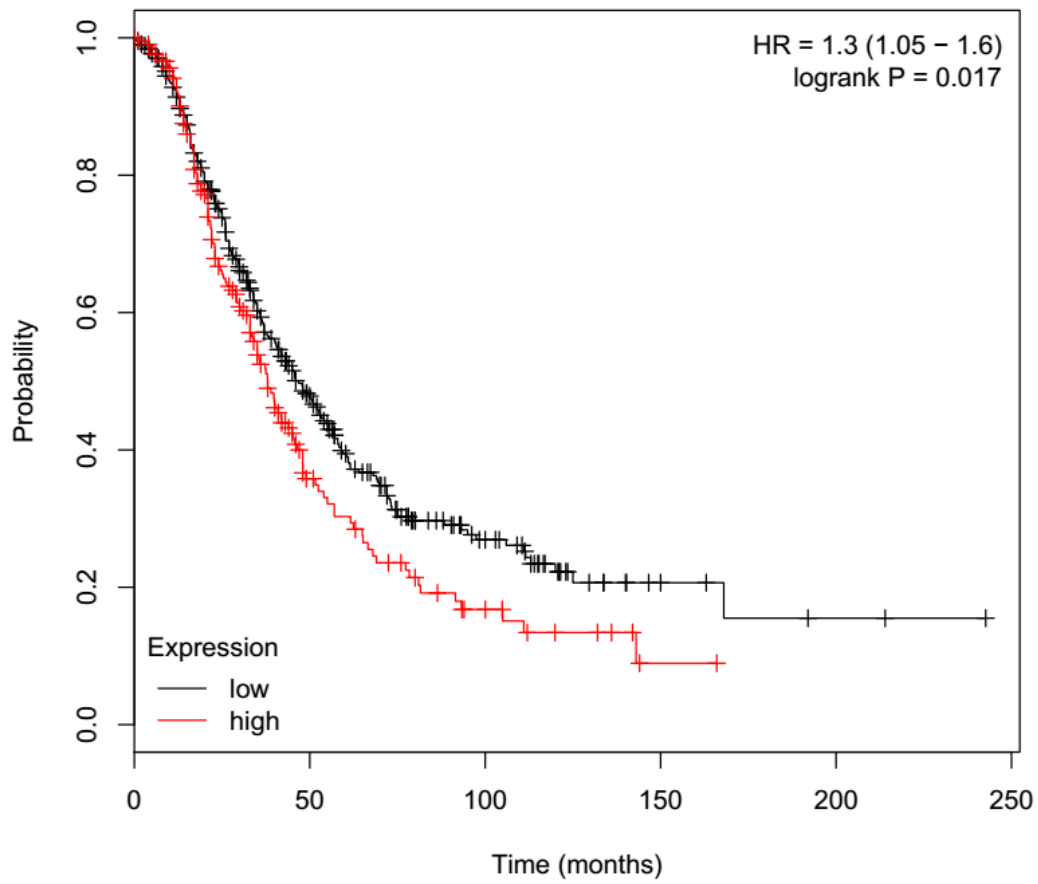

|      | Number at risk |     |     |     |     |     |
|------|----------------|-----|-----|-----|-----|-----|
|      | 0              | 50  | 100 | 150 | 200 | 250 |
| low  | 443            | 125 | 36  | 7   | 2   | 0   |
| high | 212            | 41  | 12  | 1   | 0   | 0   |

37. MRPL54

225797\_at

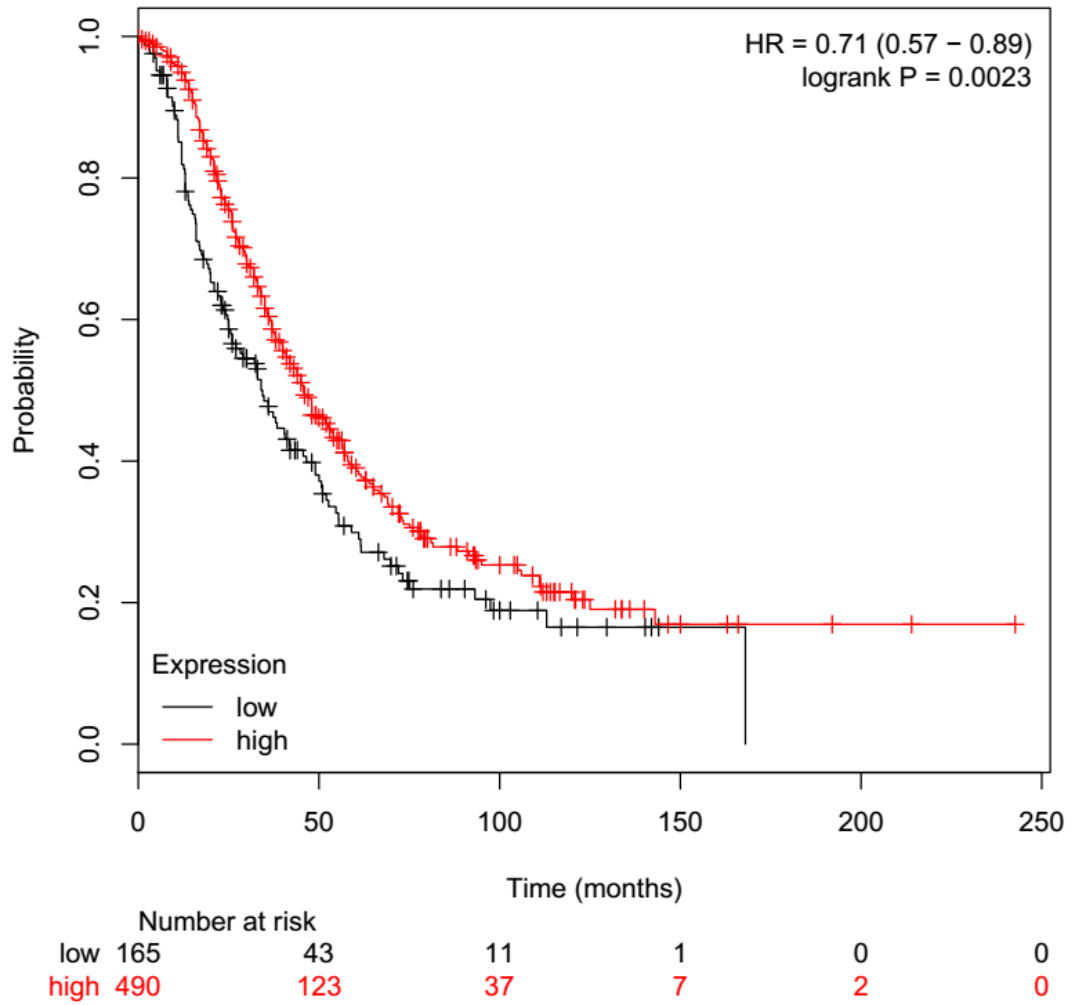

38. MRPS9

226749\_at

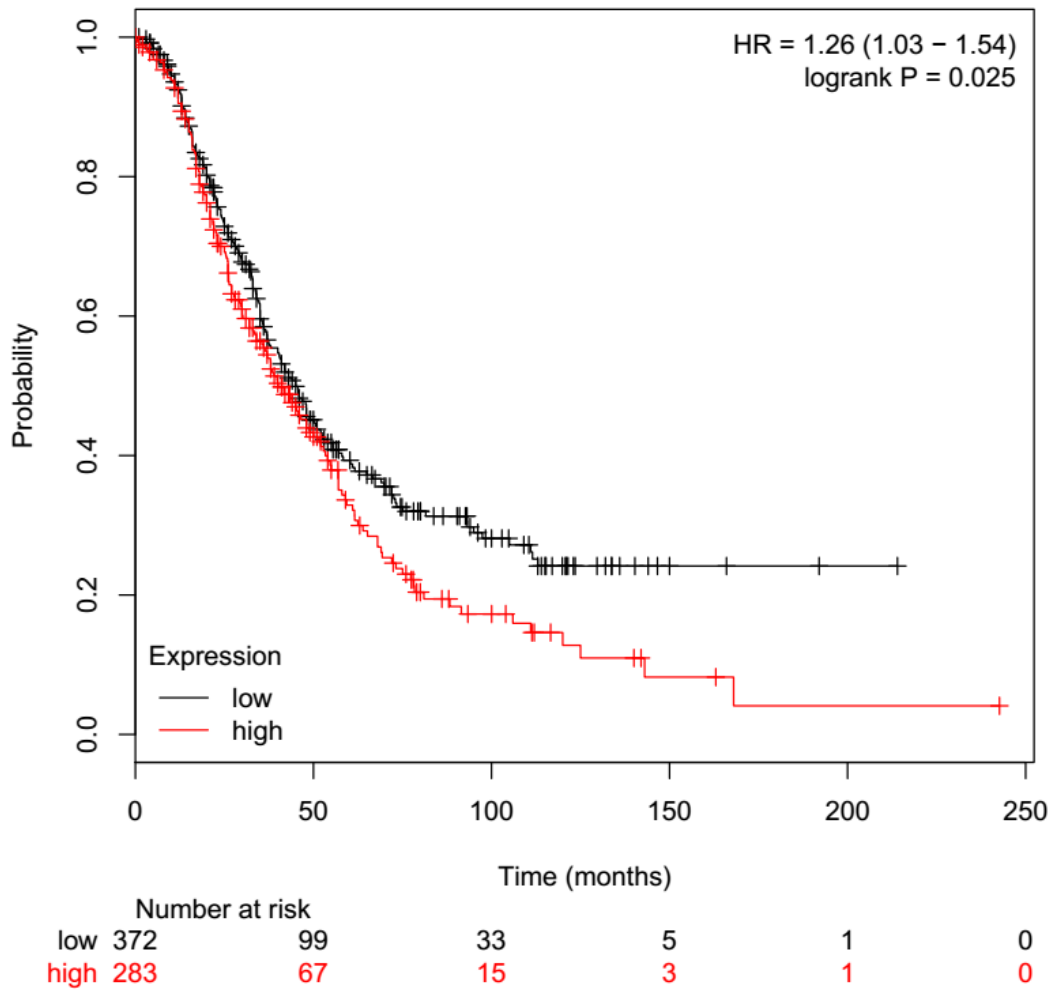

39. MRPS12

204331\_s\_at

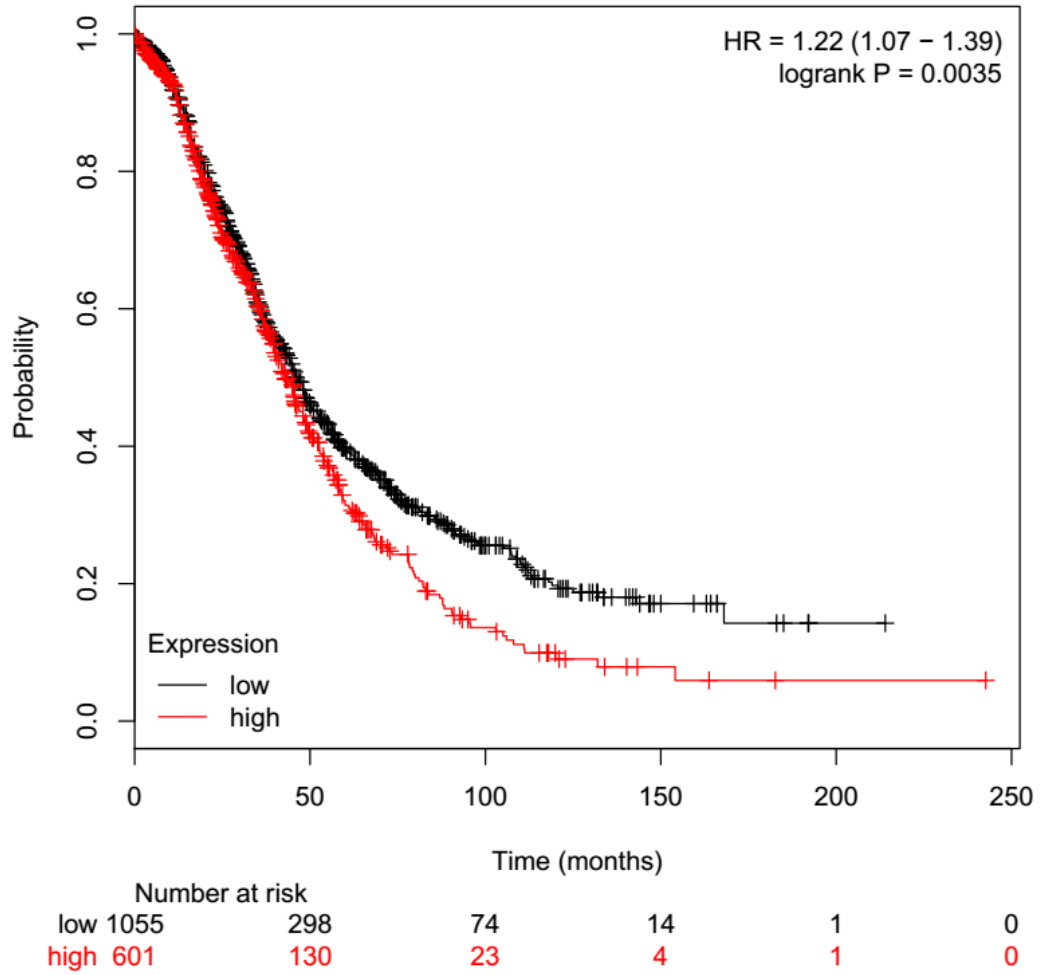

40. MRPS15

226296\_s\_at

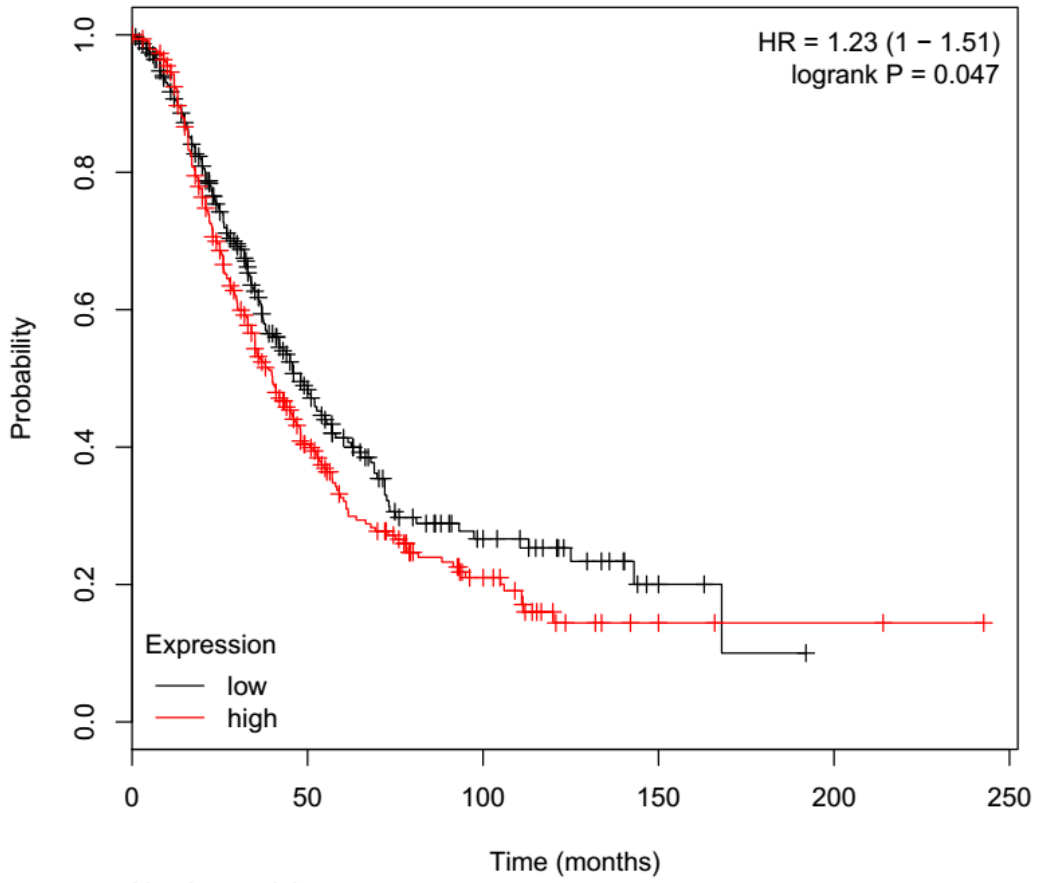

|      | Number at risk |    |     |     |     |     |
|------|----------------|----|-----|-----|-----|-----|
|      | 0              | 50 | 100 | 150 | 200 | 250 |
| low  | 317            | 82 | 23  | 4   | 0   | 0   |
| high | 338            | 84 | 25  | 4   | 2   | 0   |



41. OGN

222722\_at

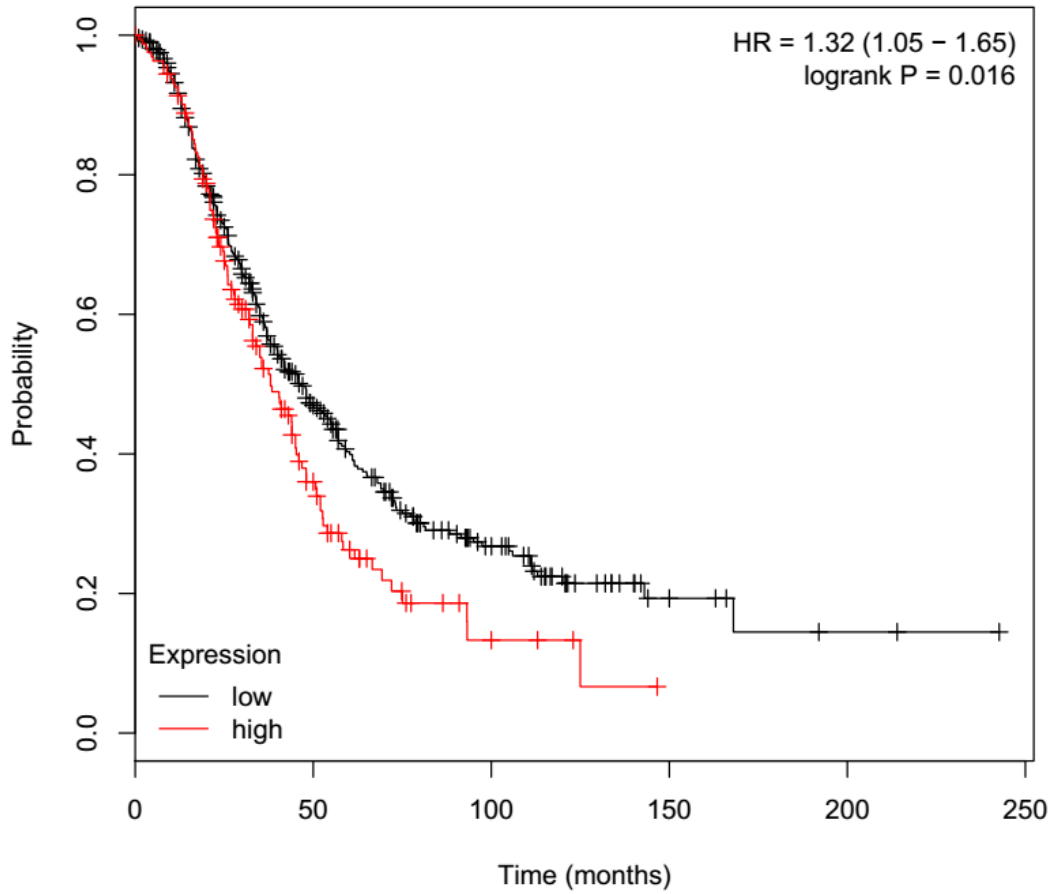

|      | 0   | 50  | 100 | 150 | 200 | 250 |
|------|-----|-----|-----|-----|-----|-----|
| low  | 490 | 130 | 43  | 8   | 2   | 0   |
| high | 165 | 36  | 5   | 0   | 0   | 0   |

42. PDIA5

203857\_s\_at

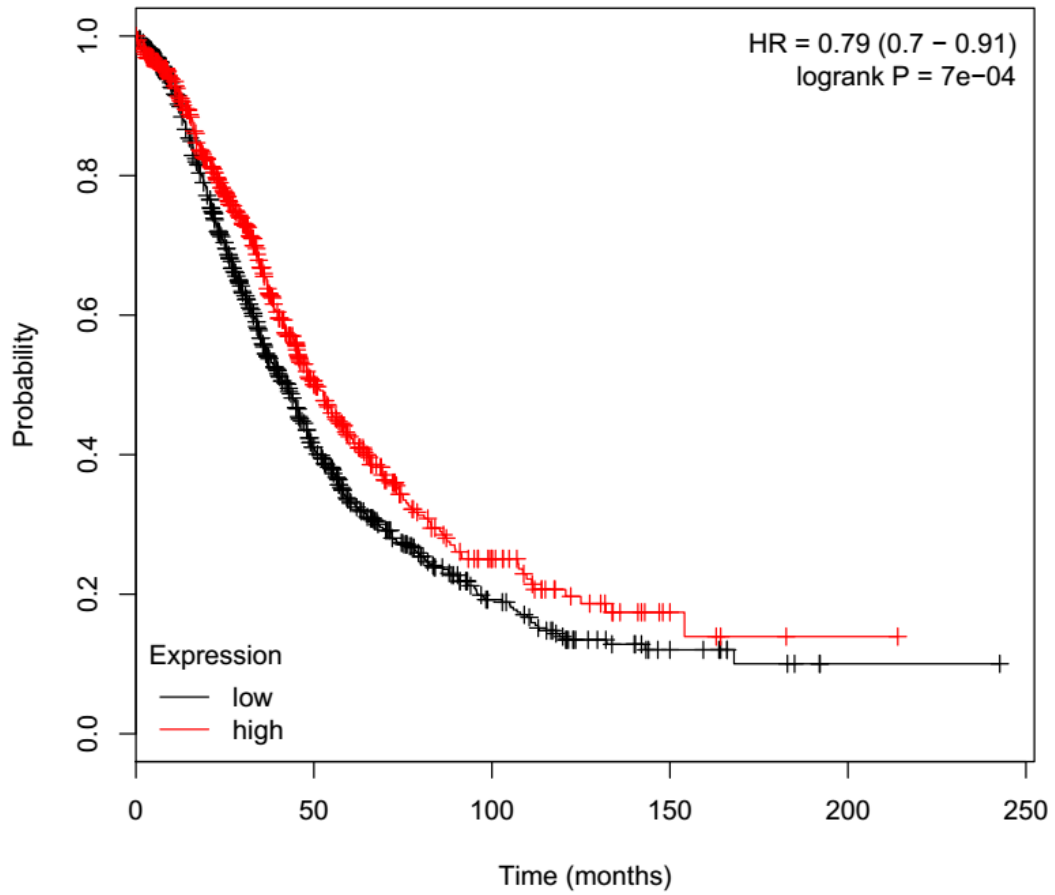

|      | Number at risk |     |     |     |     |     |
|------|----------------|-----|-----|-----|-----|-----|
|      | 0              | 50  | 100 | 150 | 200 | 250 |
| low  | 964            | 247 | 55  | 12  | 1   | 0   |
| high | 692            | 181 | 42  | 6   | 1   | 0   |

43. PECR

221142\_s\_at

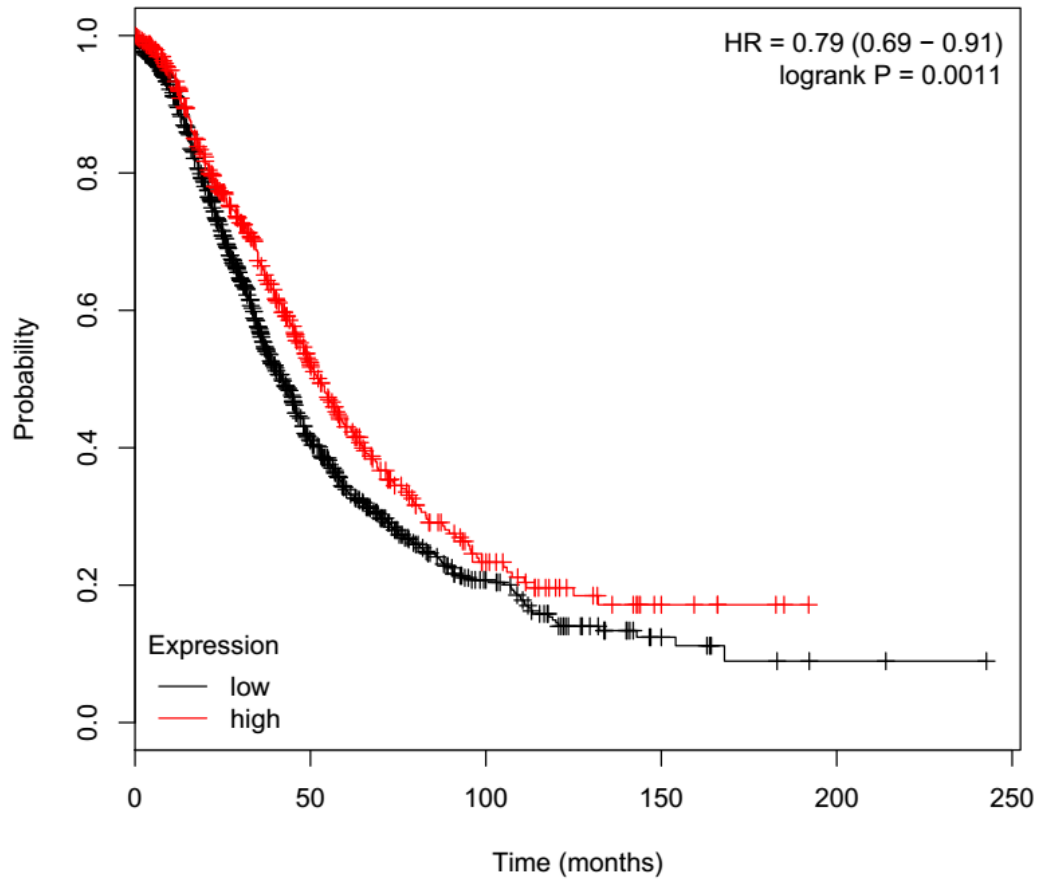

|      | Number at risk |     |    |    |   |   |
|------|----------------|-----|----|----|---|---|
|      |                |     |    |    |   |   |
| low  | 1114           | 269 | 61 | 11 | 2 | 0 |
| high | 542            | 159 | 36 | 7  | 0 | 0 |

44. PRELP

228224\_at

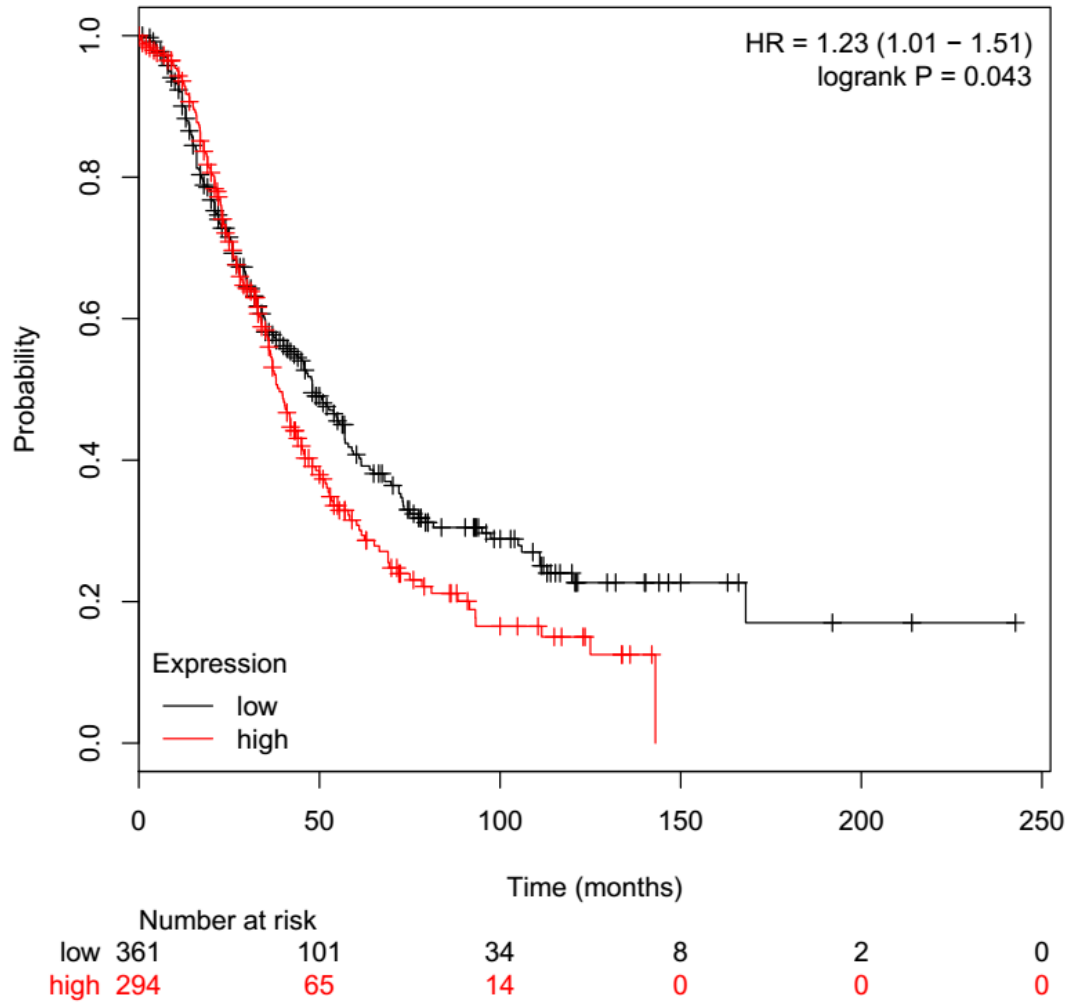

45. RDH10

227467\_at

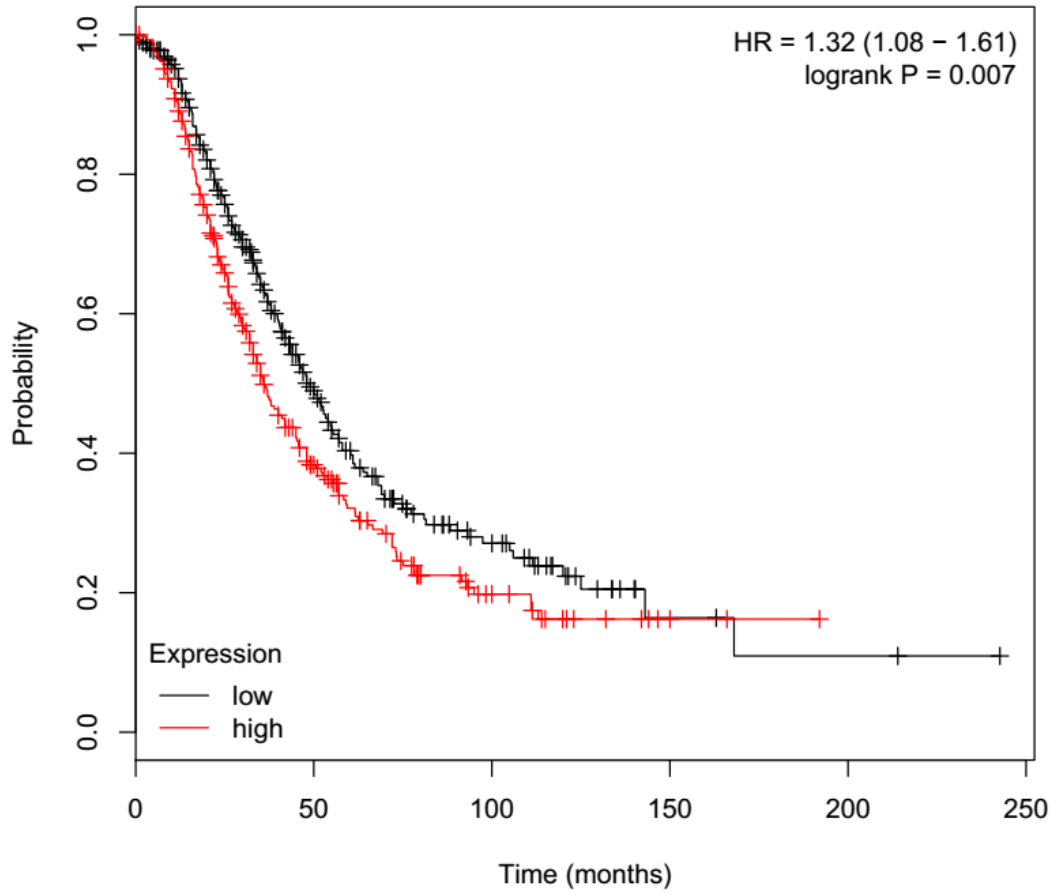

|      |     | Number at risk |    |     |     |     |     |
|------|-----|----------------|----|-----|-----|-----|-----|
|      |     | 0              | 50 | 100 | 150 | 200 | 250 |
| low  | 366 | 91             | 29 | 4   | 2   | 0   |     |
| high | 289 | 75             | 19 | 4   | 0   | 0   |     |

46. RPS3

208692\_at

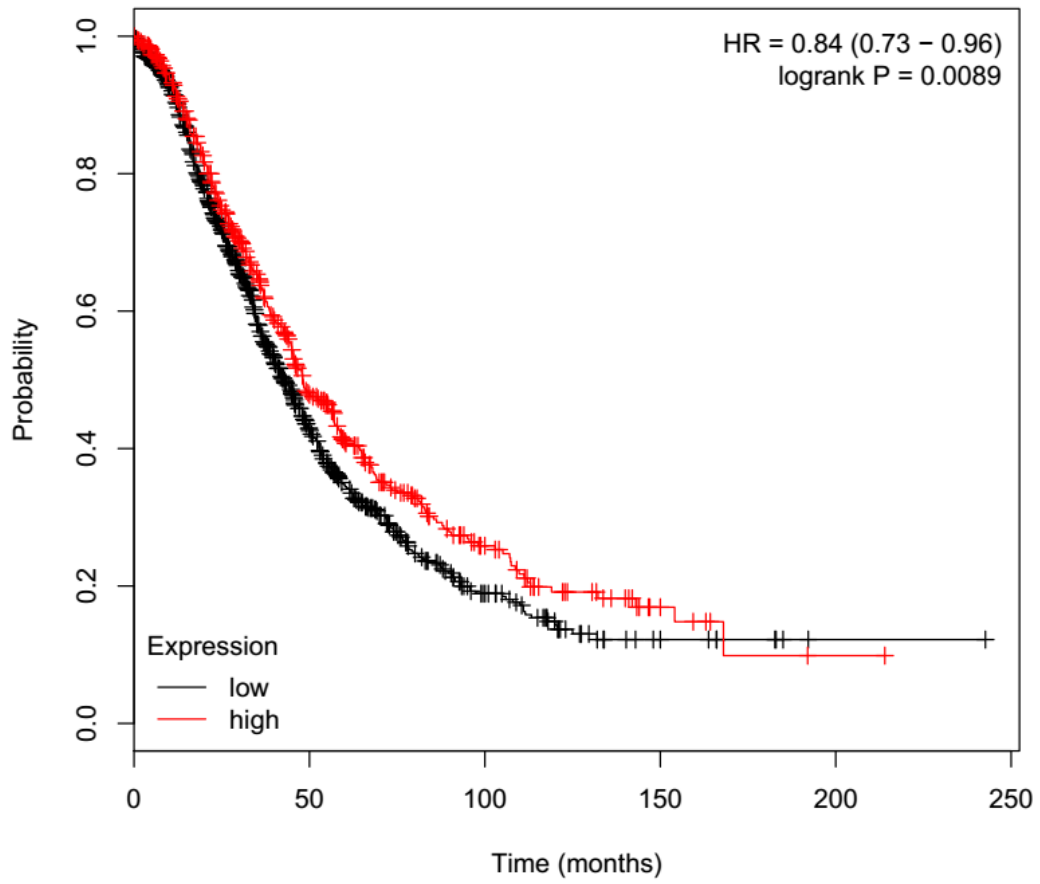

|      | Number at risk |     |     |     |     |     |
|------|----------------|-----|-----|-----|-----|-----|
|      | 0              | 50  | 100 | 150 | 200 | 250 |
| low  | 1051           | 257 | 50  | 9   | 1   | 0   |
| high | 605            | 171 | 47  | 9   | 1   | 0   |

47. RRAS

212647\_at

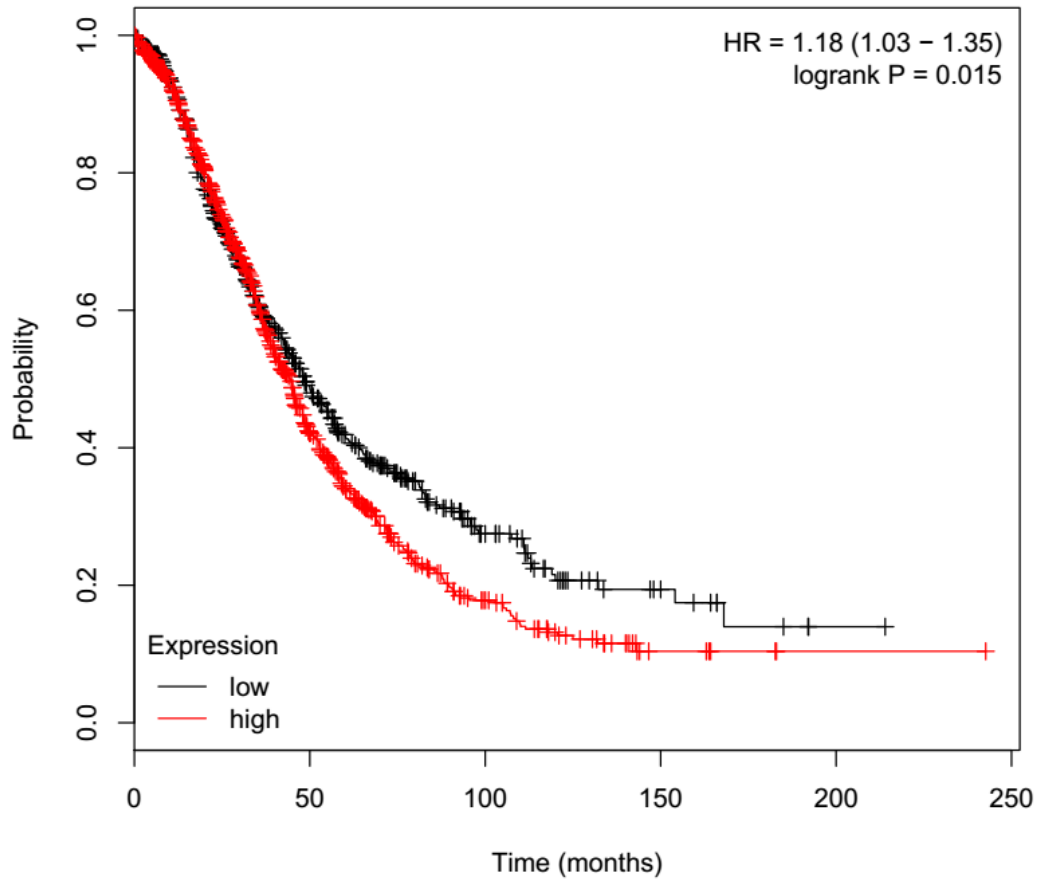

|      |      | Number at risk |    |    |   |   |
|------|------|----------------|----|----|---|---|
|      |      |                |    |    |   |   |
| low  | 647  | 180            | 46 | 12 | 1 | 0 |
| high | 1009 | 248            | 51 | 6  | 1 | 0 |

48. RRAS2

212589\_at

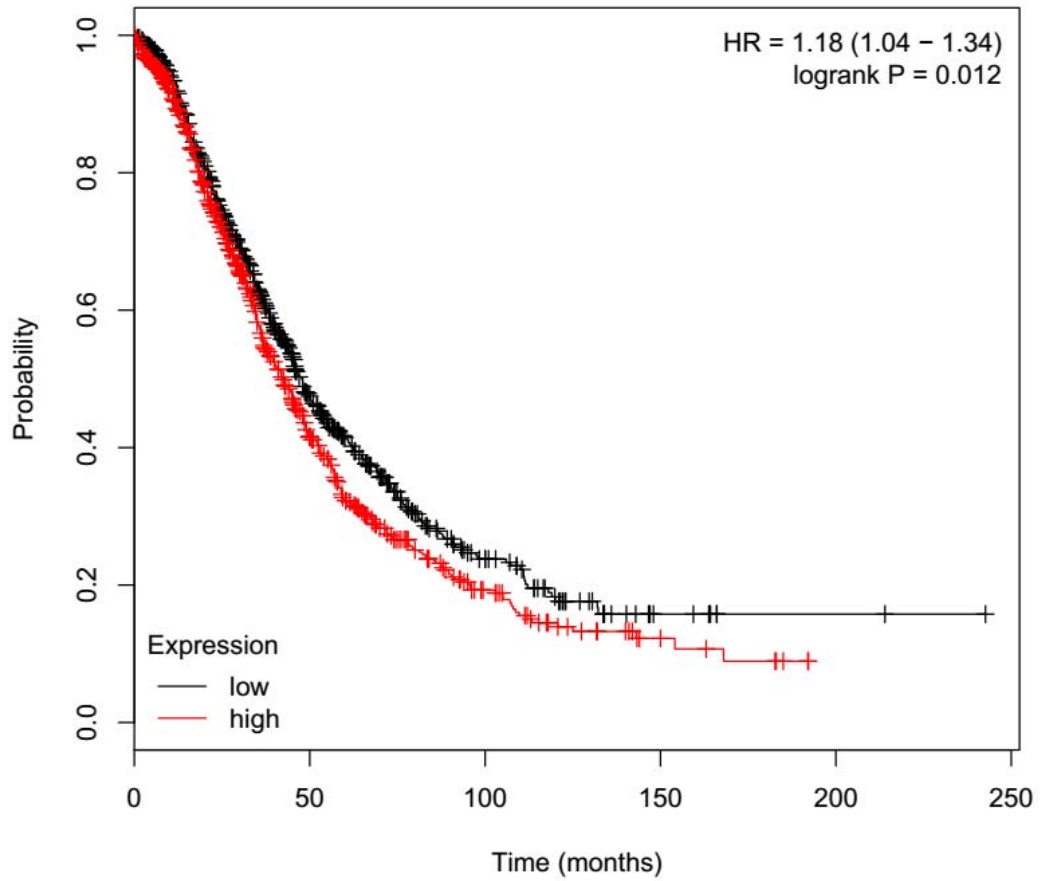

|      |     | Number at risk |     |     |     |     |
|------|-----|----------------|-----|-----|-----|-----|
|      | 0   | 50             | 100 | 150 | 200 | 250 |
| low  | 868 | 228            | 52  | 8   | 2   | 0   |
| high | 788 | 200            | 45  | 10  | 0   | 0   |



49. SRPRB

227737\_at

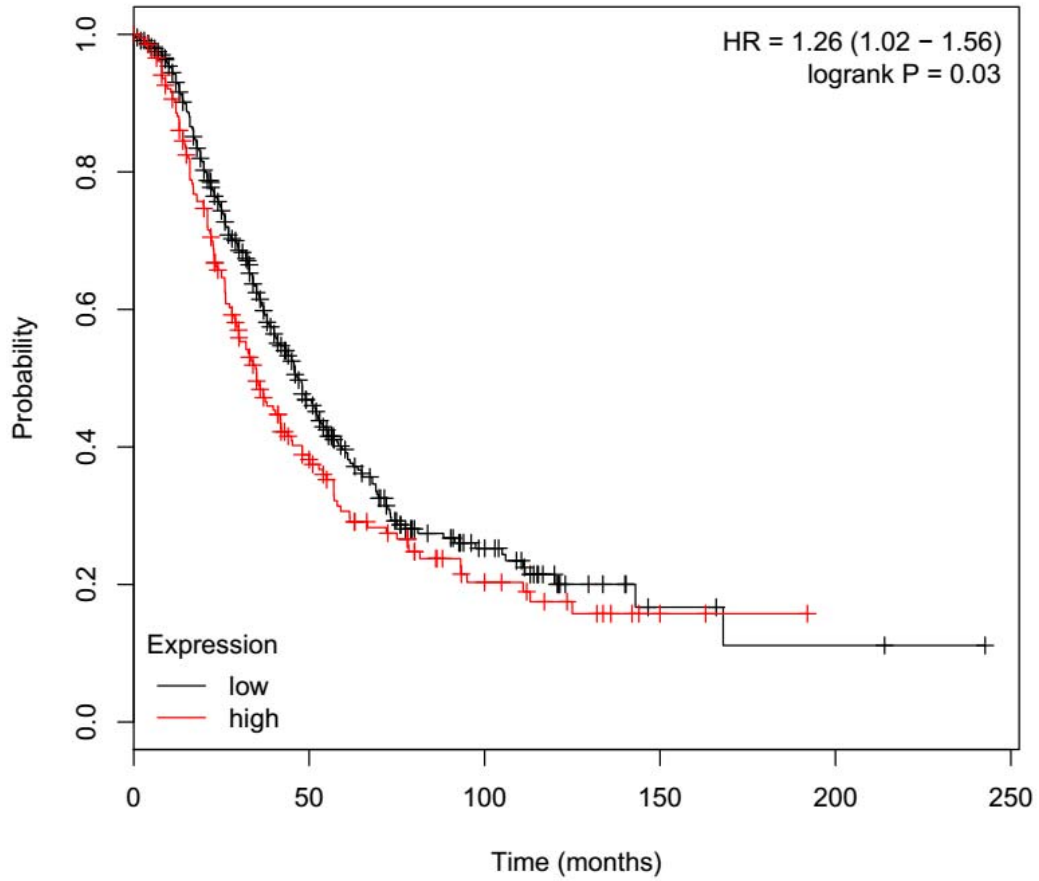

|      | Number at risk |     |     |     |     |     |
|------|----------------|-----|-----|-----|-----|-----|
|      | 0              | 50  | 100 | 150 | 200 | 250 |
| low  | 449            | 110 | 31  | 4   | 2   | 0   |
| high | 206            | 56  | 17  | 4   | 0   | 0   |

50. TXNDC12

223017\_at

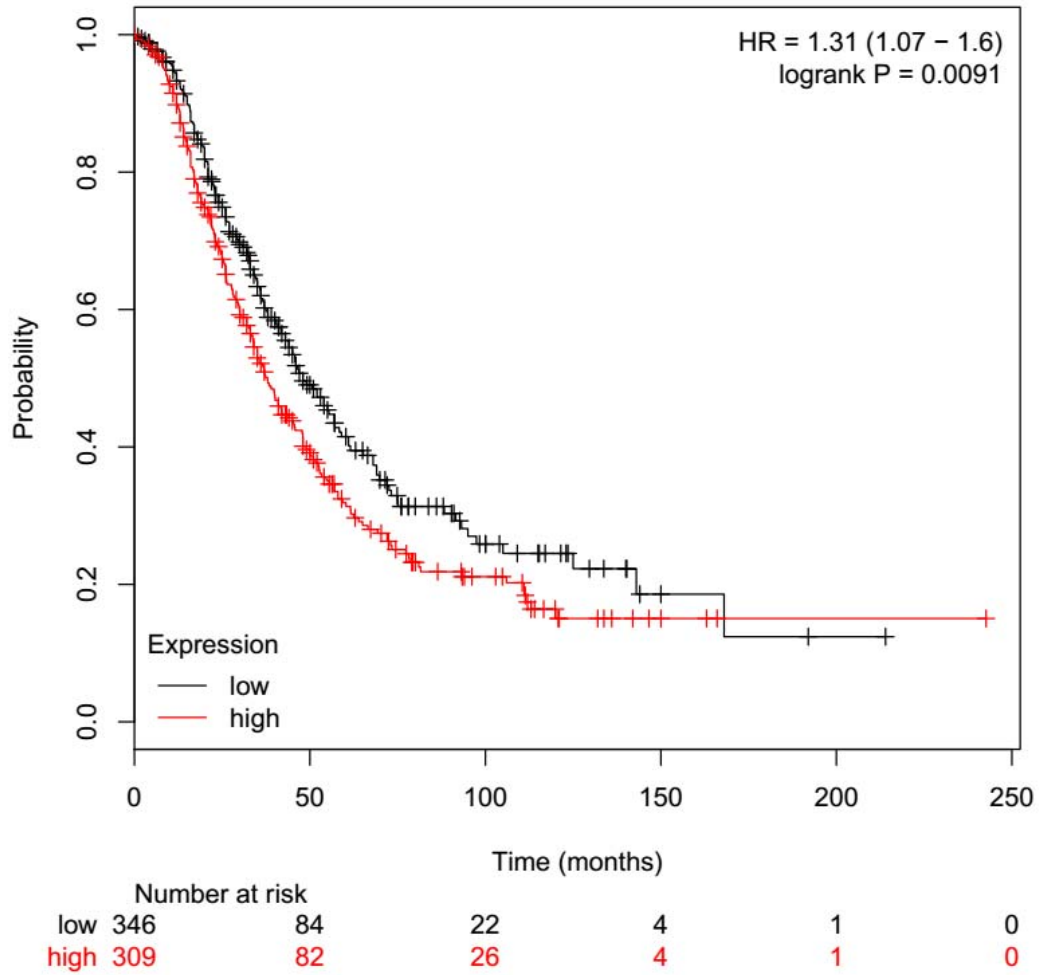

Supplement: 13167_2019_170_MOESM4_ESM.pdf [file 13167_2019_170_MOESM4_ESM.pdf]
